# Supplementary material for: Co-Catalyzed decarbonylative alkylative esterification of styrenes with aliphatic aldehydes and hypervalent iodine(iii) reagents
Source: Royal Society of Chemistry journal article supplement (doi:10.1039/c9qo00748b), 2019-01-01

## Electronic supplementary information

### Co-catalyzed decarbonylative alkylative esterification of styrenes with aliphatic aldehydes and hypervalent iodine(III) reagents

Yong Peng, Yuan-Yuan Jiang, Xue-Jiao Du, Da-You Ma, Luo Yang\*

#### Table of Contents

|                                                                                                                           |     |
|---------------------------------------------------------------------------------------------------------------------------|-----|
| I. General information.....                                                                                               | S1  |
| II. General experimental procedure .....                                                                                  | S1  |
| III. Condition optimization .....                                                                                         | S2  |
| IV. Spectra data of products <b>3a-3m</b> , <b>4b-4m</b> , <b>6a-6f</b> .....                                             | S3  |
| V. References .....                                                                                                       | S14 |
| VI. Copies of <sup>1</sup> H and <sup>13</sup> C NMR spectra of products <b>3a-3m</b> , <b>4b-4m</b> , <b>6a-6f</b> ..... | S14 |

#### I. General information

Unless otherwise noted, all commercially available compounds were used as purchased without further purification. Dry solvents (toluene, ethyl acetate, dichloromethane, acetonitrile, chlorobenzene, fluorobenzene, trifluoromethyl benzene) were used as commercially available. Thin-layer chromatography (TLC) was performed using E. Merck silica gel 60 F254 precoated plates (0.25 mm) or Sorbent Silica Gel 60 F254 plates. The developed chromatography was analyzed by UV lamp (254 nm). High-resolution mass spectra (HRMS) were obtained from a JEOL JMS-700 instrument (ESI) or Thermo Scientific LTQ Orbitrap XL (ESI). Melting points are uncorrected. Nuclear magnetic resonance (NMR) spectra were recorded on a Bruker Avance 400 spectrometer at ambient temperature. Chemical shifts for <sup>1</sup>H NMR spectra are reported in parts per million (ppm) from tetramethylsilane with the solvent resonance as the internal standard (chloroform:  $\delta$  7.26 ppm). Chemical shifts for <sup>13</sup>C NMR spectra are reported in parts per million (ppm) from tetramethylsilane with the solvent as the internal standard (CDCl<sub>3</sub>:  $\delta$  77.16 ppm). Data are reported as following: chemical shift, multiplicity (s = singlet, d = doublet, dd = doublet of doublets, t = triplet, q = quartet, m = multiplet, br = broad signal), coupling constant (Hz), and integration.

#### II. General experimental procedure

A general experimental procedure for the synthesis of **acetates (3a-3m, 4b-4m)** is described as following:

An oven-dried reaction vessel was successively charged with Co(OAc)<sub>2</sub>·4H<sub>2</sub>O (0.01 mmol, 5 mol%), iodobenzene diacetate (0.4 mmol, 2.0 equiv), styrene (**1a**, 0.2 mmol, 1.0 equiv), isobutyraldehyde (**2a**, 0.6 mmol, 3 equiv), trifluoromethyl benzene (1.0 mL) and di-*tert*-butyl

peroxide (DTBP, 0.24 mmol, 1.2 equiv). The vessel was sealed and stirred at 120 °C (oil bath temperature) for 12 h. Afterwards the resulting mixture was cooled to room temperature, the solvent was removed in vacuum. The residue was purified by column chromatography on silica gel with a mixture of dichloromethane/petroleum ether as eluent to give products **3a**.

A general experimental procedure for the synthesis of **benzoates (6a-6f)** is described as following:

An oven-dried reaction vessel was successively charged with Co(OAc)<sub>2</sub>·4H<sub>2</sub>O (0.01 mmol, 5 mol%), iodobenzene diacetate (0.3 mmol, 1.5 equiv), PhCOOH (0.64 mmol, 3.2 equiv), Na<sub>2</sub>CO<sub>3</sub> (0.32 mmol, 1.6 equiv), styrene (**1a**, 0.2 mmol, 1.0 equiv), isobutyraldehyde (**2a**, 0.6 mmol, 3 equiv), trifluoromethyl benzene (1.2 mL) and di-*tert*-butyl peroxide (DTBP, 0.4 mmol, 2 equiv). The vessel was sealed and stirred at 120 °C (oil bath temperature) for 12 h. Afterwards the resulting mixture was cooled to room temperature, the solvent was removed in vacuum. The residue was purified by column chromatography on silica gel with a mixture of dichloromethane/petroleum ether as eluent to give products **6a**.

### III. Condition optimization

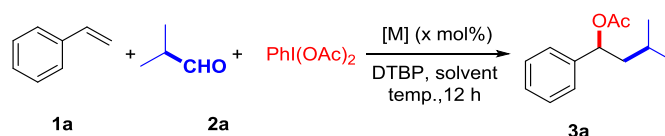

| entry | Cat.<br>(mol%)                               | Sol.<br>(1 mL)     | [O]<br>(3 equiv) | Temp. (°C) | Yield<br>[%] |
|-------|----------------------------------------------|--------------------|------------------|------------|--------------|
| 1     | --                                           | CH <sub>3</sub> CN | DTBP             | 120        | 0            |
| 2     | FeCl <sub>3</sub> (5)                        | CH <sub>3</sub> CN | DTBP             | 120        | 0            |
| 3     | Fe(acac) <sub>3</sub> (5)                    | CH <sub>3</sub> CN | DTBP             | 120        | 0            |
| 4     | Fe(OAc) <sub>2</sub> (5)                     | CH <sub>3</sub> CN | DTBP             | 120        | 0            |
| 5     | CuCl <sub>2</sub> (5)                        | CH <sub>3</sub> CN | DTBP             | 120        | 0            |
| 6     | Cu(OAc) <sub>2</sub> (5)                     | CH <sub>3</sub> CN | DTBP             | 120        | 0            |
| 7     | Cu(acac) <sub>2</sub> (5)                    | CH <sub>3</sub> CN | DTBP             | 120        | 0            |
| 8     | MnCl <sub>2</sub> (5)                        | CH <sub>3</sub> CN | DTBP             | 120        | 0            |
| 9     | NiCl <sub>2</sub> (5)                        | CH <sub>3</sub> CN | DTBP             | 120        | 0            |
| 10    | CoCl <sub>2</sub> (5)                        | CH <sub>3</sub> CN | DTBP             | 120        | 25           |
| 11    | Co <sub>2</sub> (CO) <sub>8</sub> (5)        | CH <sub>3</sub> CN | DTBP             | 120        | 15           |
| 12    | Co(OAc) <sub>2</sub> (5)                     | CH <sub>3</sub> CN | DTBP             | 120        | 34           |
| 13    | CoSO <sub>4</sub> (5)                        | CH <sub>3</sub> CN | DTBP             | 120        | 0            |
| 14    | Co(acac) <sub>2</sub> (5)                    | CH <sub>3</sub> CN | DTBP             | 120        | 22           |
| 15    | Co(acac) <sub>3</sub> (5)                    | CH <sub>3</sub> CN | DTBP             | 120        | 19           |
| 16    | Co(OAc) <sub>2</sub> ·4H <sub>2</sub> O(5)   | CH <sub>3</sub> CN | DTBP             | 120        | 43           |
| 17    | Co(OAc) <sub>2</sub> ·4H <sub>2</sub> O(7.5) | PhCF <sub>3</sub>  | DTBP             | 120        | 51           |
| 18    | Co(OAc) <sub>2</sub> ·4H <sub>2</sub> O(5)   | PhCF <sub>3</sub>  | DTBP             | 120        | 75           |
| 19    | Co(OAc) <sub>2</sub> ·4H <sub>2</sub> O(2.5) | PhCF <sub>3</sub>  | DTBP             | 120        | 66           |
| 20    | Co(OAc) <sub>2</sub> ·4H <sub>2</sub> O(5)   | PhCl               | DTBP             | 120        | 53           |
| 21    | Co(OAc) <sub>2</sub> ·4H <sub>2</sub> O(5)   | PhCH <sub>3</sub>  | DTBP             | 120        | 0            |

|    |                                            |                   |                               |     |    |
|----|--------------------------------------------|-------------------|-------------------------------|-----|----|
| 22 | Co(OAc) <sub>2</sub> ·4H <sub>2</sub> O(5) | DMF               | DTBP                          | 120 | 0  |
| 23 | Co(OAc) <sub>2</sub> ·4H <sub>2</sub> O(5) | DMSO              | DTBP                          | 120 | 0  |
| 24 | Co(OAc) <sub>2</sub> ·4H <sub>2</sub> O(5) | DCM               | DTBP                          | 120 | 0  |
| 25 | Co(OAc) <sub>2</sub> ·4H <sub>2</sub> O(5) | EA                | DTBP                          | 120 | 0  |
| 26 | Co(OAc) <sub>2</sub> ·4H <sub>2</sub> O(5) | PhF               | DTBP                          | 120 | 68 |
| 27 | Co(OAc) <sub>2</sub> ·4H <sub>2</sub> O(5) | PhCF <sub>3</sub> | DTBP                          | 120 | 75 |
| 28 | Co(OAc) <sub>2</sub> ·4H <sub>2</sub> O(5) | PhCF <sub>3</sub> | TBHP in decane                | 120 | 0  |
| 29 | Co(OAc) <sub>2</sub> ·4H <sub>2</sub> O(5) | PhCF <sub>3</sub> | H <sub>2</sub> O <sub>2</sub> | 120 | 0  |
| 30 | Co(OAc) <sub>2</sub> ·4H <sub>2</sub> O(5) | PhCF <sub>3</sub> | DTBP(1)                       | 120 | 84 |
| 31 | Co(OAc) <sub>2</sub> ·4H <sub>2</sub> O(5) | PhCF <sub>3</sub> | DTBP(1.2)                     | 120 | 90 |
| 32 | Co(OAc) <sub>2</sub> ·4H <sub>2</sub> O(5) | PhCF <sub>3</sub> | DTBP(1.5)                     | 120 | 86 |
| 33 | Co(OAc) <sub>2</sub> ·4H <sub>2</sub> O(5) | PhCF <sub>3</sub> | DTBP(1.2)                     | 110 | 81 |
| 34 | Co(OAc) <sub>2</sub> ·4H <sub>2</sub> O(5) | PhCF <sub>3</sub> | DTBP(1.2)                     | 120 | 90 |
| 35 | Co(OAc) <sub>2</sub> ·4H <sub>2</sub> O(5) | PhCF <sub>3</sub> | DTBP(1.2)                     | 130 | 50 |

Reaction conditions: **1a** (0.2 mmol, 1.0 equiv), **2a** (0.6 mmol, 3.0 equiv), PhI(OAc)<sub>2</sub> (0.4 mmol, 2.0 equiv), DTBP (0.6 mmol, 3.0 equiv), Cat. (0.01 mmol, x mol%), solvent (1.0 mL), stirred at y °C for 12 h under air.

#### IV Spectra data of products **3a-3m**, **4b-4m**, **6a-6f**

##### (**3a**) 3-methyl-1-phenylbutyl acetate<sup>1</sup>

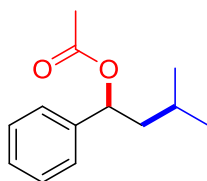

The title compound was prepared according to the general procedure described above by the reaction between styrene (**1a**) with iodobenzene diacetate and isobutyraldehyde (**2a**), and purified by flash column chromatography as colorless oil (37.1 mg, 90%).

<sup>1</sup>H NMR (400 MHz, CDCl<sub>3</sub>) δ 7.33 – 7.26 (m, 5H), 5.83 – 5.80 (m, 1H), 2.05 (d, *J* = 1.6 Hz, 3H), 1.85 (dd, *J* = 9.2, 16.4 Hz, 1H), 1.62 – 1.57 (m, 2H), 0.94 (t, *J* = 13.2 Hz, 6H). <sup>13</sup>C NMR (100 MHz, CDCl<sub>3</sub>) δ 170.48, 141.23, 128.54, 127.93, 126.63, 74.66, 45.54, 24.83, 22.88, 22.48, 21.40. IR (cm<sup>-1</sup>): 2958, 2871, 2837, 1736, 1073, 699.

##### (**3b**) 1-(4-methoxyphenyl)-3-methylbutyl acetate

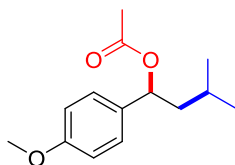

The title compound was prepared according to the general procedure described above by the reaction between 4-methoxystyrene (**1b**) with iodobenzene diacetate and isobutyraldehyde (**2a**), and purified by flash column chromatography as colorless oil (27.4 mg, 58%).

<sup>1</sup>H NMR (400 MHz, CDCl<sub>3</sub>) δ 7.28 (d, *J* = 8.8 Hz, 2H), 6.87 (d, *J* = 8.4 Hz, 2H), 5.79 (dd, *J* = 8.4, 6.0 Hz, 1H), 3.79 (s, 3H), 2.03 (s, 3H), 1.88 – 1.81 (m, 1H), 1.62 – 1.50 (m, 2H), 0.92 (dd, *J* = 10.8,

6.4 Hz, 6H).  $^{13}\text{C}$  NMR (100 MHz,  $\text{CDCl}_3$ )  $\delta$  170.58, 159.34, 133.24, 128.16, 113.91, 74.41, 55.38, 45.21, 24.86, 22.77, 22.60, 21.49. IR ( $\text{cm}^{-1}$ ): 2958, 2871, 2837, 1736, 1073, 699. HRMS: calcd. for  $\text{C}_{14}\text{H}_{20}\text{O}_3\text{Na}^+$   $[\text{M}+\text{Na}]^+$ : 259.1305; Found: 259.1293.

**(3c) 1-(4-(tert-butyl)phenyl)-3-methylbutyl acetate**

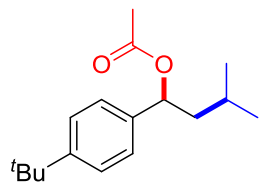

The title compound was prepared according to the general procedure described above by the reaction between 4-*tert*-butylstyrene (**1c**) with iodobenzene diacetate and isobutyraldehyde (**2a**), and purified by flash column chromatography as colorless oil (47.3 mg, 83%).

$^1\text{H}$  NMR (400 MHz,  $\text{CDCl}_3$ )  $\delta$  7.36 – 7.34 (m, 2H), 7.27 – 7.25 (m, 2H), 5.83 – 5.80 (m, 1H), 2.04 (s, 3H), 1.88 – 1.83 (m, 1H), 1.61 – 1.56 (m, 2H), 1.31 (s, 9H), 0.96 – 0.92 (m, 6H).  $^{13}\text{C}$  NMR (100 MHz,  $\text{CDCl}_3$ )  $\delta$  170.58, 150.84, 138.15, 126.42, 125.45, 74.51, 45.49, 34.66, 31.57, 31.47, 24.88, 22.92, 22.52, 21.48. IR ( $\text{cm}^{-1}$ ): 2959, 2870, 1736, 1192, 833. HRMS: calcd. for  $\text{C}_{17}\text{H}_{26}\text{O}_2\text{Na}^+$   $[\text{M}+\text{Na}]^+$ : 285.1825; Found: 285.1818.

**(3d) 3-methyl-1-(p-tolyl)butyl acetate**

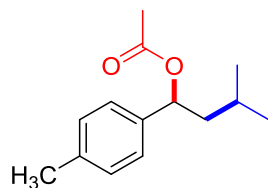

The title compound was prepared according to the general procedure described above by the reaction between 4-methylstyrene (**1d**) with iodobenzene diacetate and isobutyraldehyde (**2a**), and purified by flash column chromatography as colorless oil (34.3 mg, 78%).

$^1\text{H}$  NMR (400 MHz,  $\text{CDCl}_3$ )  $\delta$  7.23 (t,  $J$  = 4.4 Hz, 2H), 7.14 (d,  $J$  = 7.6 Hz, 2H), 5.80 – 5.77 (m, 1H), 2.33 (s, 3H), 2.03 (s, 3H), 1.88 – 1.82 (m, 1H), 1.61 – 1.51 (m, 2H), 0.93 (dd,  $J$  = 10.4, 6.4 Hz, 6H).  $^{13}\text{C}$  NMR (100 MHz,  $\text{CDCl}_3$ )  $\delta$  170.49, 138.19, 137.66, 129.21, 126.67, 74.58, 45.38, 24.83, 22.81, 22.53, 21.42, 21.24. IR ( $\text{cm}^{-1}$ ): 2957, 2870, 1736, 1240, 812. HRMS: calcd. for  $\text{C}_{14}\text{H}_{20}\text{O}_2\text{Na}^+$   $[\text{M}+\text{Na}]^+$ : 243.1356; Found: 243.1348.

**(3e) 1-(4-(chloromethyl)phenyl)-3-methylbutyl acetate**

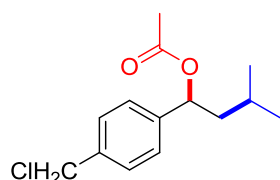

The title compound was prepared according to the general procedure described above by the reaction between 4-chloromethylstyrene (**1e**) with iodobenzene diacetate and isobutyraldehyde (**2a**), and purified by flash column chromatography as colorless oil (47.6 mg, 86%).

$^1\text{H}$  NMR (400 MHz,  $\text{CDCl}_3$ )  $\delta$  7.37 – 7.32 (m, 4H), 5.82 – 5.79 (m, 1H), 4.57 (s, 2H), 2.05 (s, 3H), 1.89 – 1.80 (m, 1H), 1.59 – 1.53 (m, 2H), 0.95 – 0.92 (dd,  $J = 9.2, 6.4$  Hz, 6H).  $^{13}\text{C}$  NMR (100 MHz,  $\text{CDCl}_3$ )  $\delta$  170.47, 141.59, 137.12, 128.84, 127.05, 74.30, 46.04, 45.49, 24.83, 22.88, 22.47, 21.39. IR ( $\text{cm}^{-1}$ ): 2958, 2870, 1735, 1236, 826. HRMS: calcd. for  $\text{C}_{14}\text{H}_{19}\text{ClO}_2\text{Na}^+$   $[\text{M}+\text{Na}]^+$ : 277.0966; Found: 277.0951.

**(3f) 3-methyl-1-(4-(trifluoromethyl)phenyl)butyl acetate**

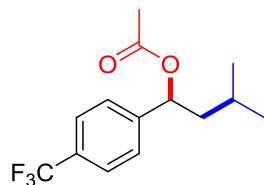

The title compound was prepared according to the general procedure described above by the reaction between 4-trifluoromethylstyrene (**1f**) with iodobenzene diacetate and isobutyraldehyde (**2a**), and purified by flash column chromatography as colorless oil (33.8 mg, 57%).

$^1\text{H}$  NMR (400 MHz,  $\text{CDCl}_3$ )  $\delta$  7.60 (d,  $J = 8.4$  Hz, 2H), 7.44 (d,  $J = 8$  Hz, 2H), 5.85 – 5.81 (m, 1H), 2.07 (s, 3H), 1.89 – 1.83 (m, 1H), 1.59 – 1.52 (m, 2H), 0.97 – 0.93 (t,  $J = 7$  Hz, 6H).  $^{13}\text{C}$  NMR (100 MHz,  $\text{CDCl}_3$ )  $\delta$  170.45, 145.36, 130.12 (q,  $J = 32.1$  Hz), 127.06, 125.61 (q,  $J = 2.7$  Hz), 124.18 (d,  $J = 270.6$  Hz), 74.03, 45.55, 24.82, 22.91, 22.38, 21.30. IR ( $\text{cm}^{-1}$ ): 2959, 2870, 1741, 1125, 825. HRMS: calcd. for  $\text{C}_{14}\text{H}_{17}\text{F}_3\text{O}_2\text{Na}^+$   $[\text{M}+\text{Na}]^+$ : 297.1073; Found: 297.1074.

**(3g) 1-(4-chlorophenyl)-3-methylbutyl acetate**

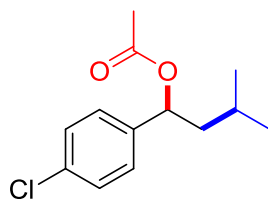

The title compound was prepared according to the general procedure described above by the reaction between 4-chlorostyrene (**1g**) with iodobenzene diacetate and isobutyraldehyde (**2a**), and purified by flash column chromatography as colorless oil (45.2 mg, 86%).

$^1\text{H}$  NMR (400 MHz,  $\text{CDCl}_3$ )  $\delta$  7.32 – 7.30 (m, 2H), 7.28 (d,  $J = 6.4$  Hz, 2H), 5.78 – 5.75 (m, 1H), 2.05 (s, 3H), 1.87 – 1.80 (m, 1H), 1.57 – 1.51 (m, 2H), 0.93 (dd,  $J = 9.2, 6.4$  Hz, 6H).  $^{13}\text{C}$  NMR (400 MHz,  $\text{CDCl}_3$ )  $\delta$  170.43, 139.79, 133.71, 128.77, 128.10, 73.99, 45.40, 24.82, 22.85, 22.47, 21.37. IR ( $\text{cm}^{-1}$ ): 2959, 2870, 2097, 1736, 699. HRMS: calcd. For  $\text{C}_{13}\text{H}_{17}\text{ClO}_2\text{Na}^+$   $[\text{M}+\text{Na}]^+$ : 263.0809; Found: 263.0795.

**(3h) 1-(3-chlorophenyl)-3-methylbutyl acetate**

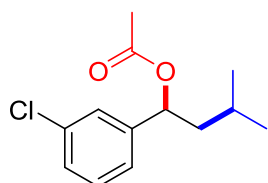

The title compound was prepared according to the general procedure described above by the reaction between 3-chlorostyrene (**1h**) with iodobenzene diacetate and isobutyraldehyde (**2a**), and purified by flash column chromatography as colorless oil (42.1 mg, 80%).

$^1\text{H}$  NMR (400 MHz,  $\text{CDCl}_3$ )  $\delta$  7.32 (s, 1H), 7.26 – 7.25(m, 2H), 7.21 – 7.19 (m, 1H), 5.78 – 5.74 (m, 1H), 2.07 (s, 3H), 1.86 – 1.80 (m, 1H), 1.59 – 1.52 (m, 2H), 0.96 – 0.92 (m, 6H).  $^{13}\text{C}$  NMR (100 MHz,  $\text{CDCl}_3$ )  $\delta$  170.38, 143.42, 134.48, 129.86, 128.10, 126.69, 124.85, 73.93, 45.53, 24.81, 22.92, 22.39, 21.33. IR ( $\text{cm}^{-1}$ ): 2959, 2871, 1736, 1158, 867. HRMS: calcd. For  $\text{C}_{13}\text{H}_{17}\text{ClO}_2\text{Na}^+$   $[\text{M}+\text{Na}]^+$ : 263.0809; Found: 263.0809.

**(3i) 1-(2-chlorophenyl)-3-methylbutyl acetate**

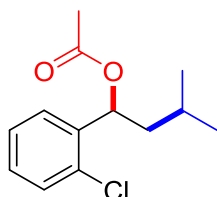

The title compound was prepared according to the general procedure described above by the reaction between 2-chlorostyrene (**1i**) with iodobenzene diacetate and isobutyraldehyde (**2a**), and purified by flash column chromatography as colorless oil (38.9 mg, 74%).

$^1\text{H}$  NMR (400 MHz,  $\text{CDCl}_3$ )  $\delta$  7.37 (dd,  $J$  = 8, 2 Hz, 1H), 7.33 (dd,  $J$  = 8, 1.2 Hz, 1H), 7.25 – 7.19 (m, 2H), 6.21 (dd,  $J$  = 9.2, 3.6 Hz, 1H), 2.10 (s, 3H), 1.80 – 1.69 (m, 2H), 1.58 – 1.54 (m, 1H), 0.97 (dd,  $J$  = 17.2, 6.4 Hz, 6H).  $^{13}\text{C}$  NMR (100 MHz,  $\text{CDCl}_3$ )  $\delta$  170.20, 139.65, 132.14, 129.71, 128.73, 127.17, 126.81, 71.37, 44.86, 25.11, 23.43, 21.89, 21.25. IR ( $\text{cm}^{-1}$ ): 2958, 2870, 1736, 1123, 785. HRMS: calcd. For  $\text{C}_{13}\text{H}_{17}\text{ClO}_2\text{Na}^+$   $[\text{M}+\text{Na}]^+$ : 263.0809; Found: 263.0795.

**(3j) 1-(4-fluorophenyl)-3-methylbutyl acetate**

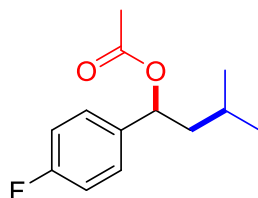

The title compound was prepared according to the general procedure described above by the reaction between 4-fluorostyrene (**1j**) with iodobenzene diacetate and isobutyraldehyde (**2a**), and purified by flash column chromatography as colorless oil (39.0 mg, 79%).

$^1\text{H}$  NMR (400 MHz,  $\text{CDCl}_3$ )  $\delta$  7.33 – 7.29 (m, 2H), 7.04 – 7.00 (m, 2H), 5.80 – 5.77 (m, 1H), 2.04 (s, 3H), 1.86 – 1.80 (m, 1H), 1.57 – 1.51 (m, 2H), 0.95 – 0.91 (m, 6H).  $^{13}\text{C}$  NMR (100 MHz,  $\text{CDCl}_3$ )  $\delta$  170.49, 162.42 (d,  $J$  = 244.6 Hz), 137.04 (d,  $J$  = 3.2 Hz), 128.47 (d,  $J$  = 8.1 Hz), 115.45 (d,  $J$  = 21.3 Hz), 74.02, 45.44, 24.83, 22.83, 22.50, 21.41. IR ( $\text{cm}^{-1}$ ): 2959, 2871, 1740, 1158, 837. HRMS: calcd. For  $\text{C}_{13}\text{H}_{17}\text{FO}_2\text{Na}^+$   $[\text{M}+\text{Na}]^+$ : 247.1105; Found: 247.1091.

**(3k) 1-(4-bromophenyl)-3-methylbutyl acetate**

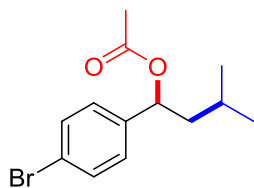

The title compound was prepared according to the general procedure described above by the reaction between 4-bromostyrene (**1k**) with iodobenzene diacetate and isobutyraldehyde (**2a**), and purified by flash column chromatography as colorless oil (45.4 mg, 74%).

$^1\text{H}$  NMR (400 MHz,  $\text{CDCl}_3$ )  $\delta$  7.46 (d,  $J = 8.4$  Hz, 2H), 7.21 (d,  $J = 8.4$  Hz, 2H), 5.77 - 5.73 (m, 1H), 2.05 (s, 3H), 1.88 - 1.78 (m, 1H), 1.59 - 1.50 (m, 2H), 0.93 (dd,  $J = 2, 6.4$  Hz, 6H).  $^{13}\text{C}$  NMR (100 MHz,  $\text{CDCl}_3$ )  $\delta$  170.40, 140.30, 131.71, 128.41, 121.82, 74.01, 45.35, 24.79, 22.84, 22.45, 21.34. IR ( $\text{cm}^{-1}$ ): 2958, 2870, 1736, 1299, 817. HRMS: calcd. For  $\text{C}_{13}\text{H}_{17}\text{BrO}_2\text{Na}^+$   $[\text{M}+\text{Na}]^+$ : 307.0304; Found: 307.0296.

**(3l) 1-(3-bromophenyl)-3-methylbutyl acetate**

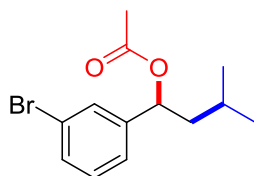

The title compound was prepared according to the general procedure described above by the reaction between 3-bromostyrene (**1l**) with iodobenzene diacetate and isobutyraldehyde (**2a**), and purified by flash column chromatography as colorless oil (47.9 mg, 78%).

$^1\text{H}$  NMR (400 MHz,  $\text{CDCl}_3$ )  $\delta$  7.47 (t,  $J = 1.8$  Hz, 1H), 7.42 - 7.39 (m, 1H), 7.25 - 7.18 (m, 2H), 5.76 - 5.73 (m, 1H), 2.07 (s, 3H), 1.87 - 1.80 (m, 1H), 1.58 - 1.50 (m, 2H), 0.94 (dd,  $J = 4.8, 6.8$  Hz, 6H).  $^{13}\text{C}$  NMR (100 MHz,  $\text{CDCl}_3$ )  $\delta$  170.37, 143.67, 131.04, 130.16, 129.59, 125.33, 122.68, 73.86, 45.54, 24.81, 22.92, 22.38, 21.34. IR ( $\text{cm}^{-1}$ ): 2958, 2870, 1739, 782. HRMS: calcd. For  $\text{C}_{13}\text{H}_{17}\text{BrO}_2\text{Na}^+$   $[\text{M}+\text{Na}]^+$ : 307.0304; Found: 307.0296.

**(3m) 3-methyl-1,2-diphenylbutyl acetate**

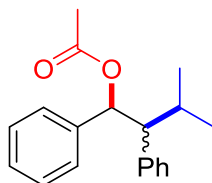

The title compound was prepared according to the general procedure described above by the reaction between trans-1,2-diphenylethene (**1m**) with iodobenzene diacetate and isobutyraldehyde (**2a**), and purified by flash column chromatography as colorless oil (32.9 mg, 54%, d.r. = 1.7 : 1).

$^1\text{H}$  NMR (400 MHz,  $\text{CDCl}_3$ )  $\delta$  7.24 - 7.07 (m, 9H), 6.93 - 6.91 (m, 1H), 6.25 (dd,  $J = 17.6, 7.6$  Hz, 1H), 3.10 - 2.78 (m, 1H), 2.80 (t,  $J = 7.2$  Hz, 0.37 $\times$ 1H), 2.28 - 2.20 (m, 0.6 $\times$ 1H), 2.08 (s, 1.88 $\times$ 1H), 1.90 (s, 1.12 $\times$ 1H), 1.88 - 1.83 (m, 0.37 $\times$ 1H), 0.87 (m, 6H).  $^{13}\text{C}$  NMR (100 MHz,  $\text{CDCl}_3$ )  $\delta$  170.33, 170.24, 140.08, 139.42, 138.85, 137.93, 130.31, 129.84, 128.24, 127.86, 127.78, 127.66, 127.64, 127.56, 126.93, 126.44, 76.53, 76.18, 58.36, 57.01, 28.74, 28.44, 21.88, 21.86, 21.44, 21.10, 19.29, 18.44. IR ( $\text{cm}^{-1}$ ): 2960, 2930, 2873, 1739, 1234, 761. HRMS: calcd. For  $\text{C}_{19}\text{H}_{22}\text{O}_2\text{Na}^+$   $[\text{M}+\text{Na}]^+$ : 305.1512; Found: 305.1503.

**(4b) 3,3-dimethyl-1-phenylbutyl acetate<sup>2</sup>**

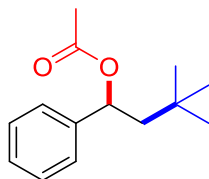

The title compound was prepared according to the general procedure described above by the reaction between styrene (**1a**) with iodobenzene diacetate and pivaldehyde (**2b**), and purified by flash column chromatography as colorless oil (37.8 mg, 86%).

<sup>1</sup>H NMR (400 MHz, CDCl<sub>3</sub>)  $\delta$  7.33 – 7.24 (m, 5H), 5.88 – 5.85 (m, 1H), 2.03 (s, 3H), 1.99 – 1.93 (m, 1H), 1.63 – 1.61 (m, 1H), 0.95 (s, 9H). <sup>13</sup>C NMR (100 MHz, CDCl<sub>3</sub>)  $\delta$  170.42, 142.56, 128.58, 127.80, 126.45, 74.11, 50.05, 30.60, 30.02, 21.60. IR (cm<sup>-1</sup>): 3030, 2955, 2870, 1739, 1239, 699.

**(4c) 3-methyl-1-phenylpentyl acetate**

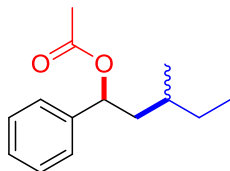

The title compound was prepared according to the general procedure described above by the reaction between styrene (**1a**) with iodobenzene diacetate and 2-methylbutanal (**2c**), and purified by flash column chromatography as colorless oil (36.5 mg, 75%, d.r. = 1.2 : 1).

<sup>1</sup>H NMR (400 MHz, CDCl<sub>3</sub>)  $\delta$  7.34 – 7.27 (m, 5H), 5.86 – 5.80 (m, 1H), 2.05 (d,  $J$  = 6.4 Hz, 3H), 1.76 (t,  $J$  = 7.0 Hz, 1H), 1.50 – 1.12 (m, 4H), 0.93 – 0.81 (m, 6H). <sup>13</sup>C NMR (100 MHz, CDCl<sub>3</sub>)  $\delta$  170.56, 170.50, 141.59, 141.03, 128.56, 128.01, 127.89, 126.84, 126.52, 74.89, 74.36, 43.72, 43.08, 31.05, 29.78, 29.33, 21.48, 21.42, 19.36, 19.05, 11.26, 11.10. IR (cm<sup>-1</sup>): 2964, 2930, 2875, 1739, 1236, 698. HRMS: calcd. For C<sub>14</sub>H<sub>20</sub>O<sub>2</sub>Na<sup>+</sup> [M+Na]<sup>+</sup>: 243.1356; Found: 243.1348.

**(4d) 3-ethyl-1-phenylpentyl acetate**

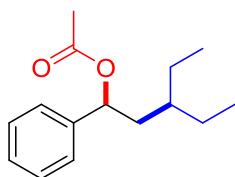

The title compound was prepared according to the general procedure described above by the reaction between styrene (**1a**) with iodobenzene diacetate and 2-ethylbutanal (**2d**), and purified by flash column chromatography as colorless oil (41.6 mg, 81%).

<sup>1</sup>H NMR (400 MHz, CDCl<sub>3</sub>)  $\delta$  7.34 – 7.25 (m, 5H), 5.81 (dd,  $J$  = 8.8, 6.0 Hz, 1H), 2.05 (s, 3H), 1.91 – 1.84 (m, 1H), 1.65 (dd,  $J$  = 13.2, 6.0 Hz, 1H), 1.40 – 1.28 (m, 4H), 1.22 (dd,  $J$  = 12.4, 6.0 Hz, 1H), 0.83 (dt,  $J$  = 19.2, 7.2 Hz, 6H). <sup>13</sup>C NMR (100 MHz, CDCl<sub>3</sub>)  $\delta$  170.53, 141.36, 128.54, 127.93, 126.66, 74.70, 39.98, 36.79, 25.48, 25.15, 21.42, 10.67, 10.51. IR (cm<sup>-1</sup>): 2963, 2932, 2875, 1736, 1236, 699. HRMS: calcd. For C<sub>15</sub>H<sub>22</sub>O<sub>2</sub>Na<sup>+</sup> [M+Na]<sup>+</sup>: 257.1512; Found: 257.1509.

**(4e) 3-ethyl-1-phenylheptyl acetate**



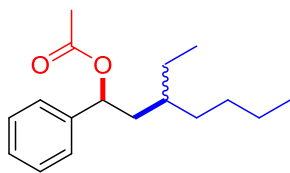

The title compound was prepared according to the general procedure described above by the reaction between styrene (**1a**) with iodobenzene diacetate and 2-ethylhexanal (**2e**), and purified by flash column chromatography as colorless oil (47.9 mg, 84%, d.r. = 1.2 : 1).

$^1\text{H}$  NMR (400 MHz,  $\text{CDCl}_3$ )  $\delta$  7.33 – 7.25 (m, 5H), 5.81 (t,  $J$  = 7.0 Hz, 1H), 2.05 (s, 3H), 1.89 – 1.85 (m, 1H), 1.65 (d,  $J$  = 8.8 Hz, 1H), 1.35 – 1.21 (m, 9H), 0.89 – 0.79 (m, 6H).  $^{13}\text{C}$  NMR (100 MHz,  $\text{CDCl}_3$ )  $\delta$  170.52, 141.40, 141.34, 128.53, 127.92, 126.68, 126.64, 74.77, 74.72, 40.45, 40.40, 35.38, 32.87, 32.59, 28.72, 28.58, 26.03, 25.66, 23.16, 23.10, 21.42, 14.25, 14.22, 10.62, 10.47. IR ( $\text{cm}^{-1}$ ): 2963, 2932, 2875, 1739, 1235, 699. HRMS: calcd. For  $\text{C}_{17}\text{H}_{26}\text{O}_2\text{Na}^+$   $[\text{M}+\text{Na}]^+$ : 285.1825; Found: 285.1822.

**(4f) 2-cyclohexyl-1-phenylethyl acetate**

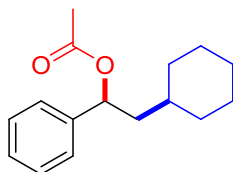

The title compound was prepared according to the general procedure described above by the reaction between styrene (**1a**) with iodobenzene diacetate and cyclohexanecarboxaldehyde (**2f**), and purified by flash column chromatography as colorless oil (43.0 mg, 80%).

$^1\text{H}$  NMR (400 MHz,  $\text{CDCl}_3$ )  $\delta$  7.33 – 7.26 (m, 5H), 5.84 (dd,  $J$  = 8.8, 6.0 Hz, 1H), 2.05 (s, 3H), 1.88 – 1.81 (m, 1H), 1.76 – 1.61 (m, 6H), 1.29 – 1.14 (m, 4H), 1.01 – 0.90 (m, 2H).  $^{13}\text{C}$  NMR (100 MHz,  $\text{CDCl}_3$ )  $\delta$  170.52, 141.37, 128.54, 127.90, 126.63, 74.11, 44.20, 34.19, 33.60, 33.09, 26.58, 26.27, 26.18, 21.45. IR ( $\text{cm}^{-1}$ ): 3064, 2923, 2851, 1736, 1237, 699. HRMS: calcd. For  $\text{C}_{16}\text{H}_{22}\text{O}_2\text{Na}^+$   $[\text{M}+\text{Na}]^+$ : 269.1512; Found: 269.1503.

**(4g) 2-cyclopentyl-1-phenylethyl acetate**

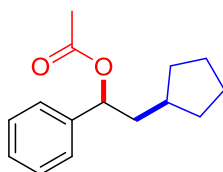

The title compound was prepared according to the general procedure described above by the reaction between styrene (**1a**) with iodobenzene diacetate and cyclopentanecarbaldehyde (**2g**), and purified by flash column chromatography as colorless oil (37.6 mg, 81%).

$^1\text{H}$  NMR (400 MHz,  $\text{CDCl}_3$ )  $\delta$  7.34 – 7.28 (m, 5H), 5.78 – 5.74 (m, 1H), 2.06 (s, 3H), 1.99 – 1.92 (m, 1H), 1.81 – 1.67 (m, 4H), 1.59 – 1.41 (m, 4H), 1.20 – 1.08 (m, 2H).  $^{13}\text{C}$  NMR (100 MHz,  $\text{CDCl}_3$ )  $\delta$  170.52, 141.37, 128.54, 127.90, 126.63, 74.11, 44.20, 34.19, 33.60, 33.09, 26.58, 26.27, 26.18, 21.45. IR ( $\text{cm}^{-1}$ ): 3064, 2950, 2867, 1736, 1237, 699. HRMS: calcd. For  $\text{C}_{15}\text{H}_{20}\text{O}_2\text{Na}^+$   $[\text{M}+\text{Na}]^+$ : 255.1356; Found: 255.1370.

**(4h) 4,6,6-trimethyl-1-phenylheptyl acetate**

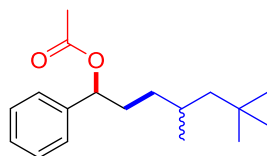

The title compound was prepared according to the general procedure described above by the reaction between styrene (**1a**) with iodobenzene diacetate and 3,5,5-trimethylhexanal (**2h**), and purified by flash column chromatography as colorless oil (40.9 mg, 78%, d.r. = 1.2 : 1).

$^1\text{H}$  NMR (400 MHz,  $\text{CDCl}_3$ )  $\delta$  7.34 – 7.28 (m, 5H), 5.72 – 5.64 (m, 1H), 2.06 (s, 3H), 1.92 – 1.73 (m, 2H), 1.49 – 1.42 (m, 1H), 1.23 – 1.14 (m, 2H), 1.10 – 1.01 (m, 2H), 0.90 – 0.85 (m, 12H).  $^{13}\text{C}$  NMR (100 MHz,  $\text{CDCl}_3$ )  $\delta$  170.56, 141.06, 140.94, 128.53, 127.96, 126.73, 126.67, 126.65, 76.62, 76.48, 51.15, 50.69, 38.33, 35.12 (d,  $J = 5.4$  Hz), 34.07, 31.31, 31.16, 30.13, 29.19, 29.11, 27.73, 25.62, 24.22, 22.64, 22.61, 21.43. IR ( $\text{cm}^{-1}$ ): 3064, 2950, 2867, 1736, 1236, 699. HRMS: calcd. For  $\text{C}_{18}\text{H}_{28}\text{O}_2\text{Na}^+$   $[\text{M}+\text{Na}]^+$ : 299.1982; Found: 299.1987.

**(4i) 5-methyl-1-phenylhexyl acetate**

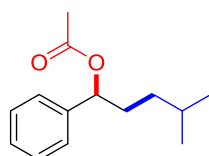

The title compound was prepared according to the general procedure described above by the reaction between styrene (**1a**) with iodobenzene diacetate and 4-methylpentanal (**2i**), and purified by flash column chromatography as colorless oil (33.7 mg, 72%).

$^1\text{H}$  NMR (400 MHz,  $\text{CDCl}_3$ )  $\delta$  7.34 – 7.28 (m, 5H), 5.70 (dd,  $J = 7.2, 6.4$  Hz, 1H), 2.07 (s, 3H), 1.95 – 1.85 (m, 1H), 1.81 – 1.72 (m, 1H), 1.57 – 1.49 (m, 1H), 1.26 – 1.19 (m, 1H), 1.13 – 1.06 (m, 1H), 0.86 (dd,  $J = 6.4, 2.4$  Hz, 6H).  $^{13}\text{C}$  NMR (100 MHz,  $\text{CDCl}_3$ )  $\delta$  170.56, 141.01, 128.54, 127.95, 126.68, 76.56, 34.66, 34.35, 27.98, 22.63, 22.60, 21.44. IR ( $\text{cm}^{-1}$ ): 3064, 2956, 2870, 1736, 1237, 700. HRMS: calcd. For  $\text{C}_{14}\text{H}_{20}\text{O}_2\text{Na}^+$   $[\text{M}+\text{Na}]^+$ : 243.1356; Found: 243.1366.

**(4j) 4,4-dimethyl-1-phenylpentyl acetate**

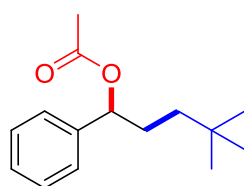

The title compound was prepared according to the general procedure described above by the reaction between styrene (**1a**) with iodobenzene diacetate and 3,3-dimethylbutanal (**2j**), and purified by flash column chromatography as colorless oil (29.6 mg, 63%).

$^1\text{H}$  NMR (400 MHz,  $\text{CDCl}_3$ )  $\delta$  7.35 – 7.27 (m, 5H), 5.69 – 5.65 (m, 1H), 2.07 (s, 3H), 1.92 – 1.83 (m, 1H), 1.79 – 1.71 (m, 1H), 1.26 – 1.21 (m, 1H), 1.10 – 0.94 (m, 1H), 0.85 (s, 9H).  $^{13}\text{C}$  NMR (100 MHz,  $\text{CDCl}_3$ )  $\delta$  170.57, 141.00, 128.55, 127.97, 126.72, 76.99, 39.63, 31.68, 30.19, 29.39, 21.45. IR ( $\text{cm}^{-1}$ ): 3064, 2956, 2870, 1736, 1236, 699. HRMS: calcd. For  $\text{C}_{15}\text{H}_{22}\text{O}_2\text{Na}^+$   $[\text{M}+\text{Na}]^+$ : 257.1512; Found: 257.1499.

**(4k) 1-phenylbutyl acetate**

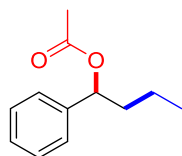

The title compound was prepared according to the general procedure described above by the reaction between styrene (**1a**) with iodobenzene diacetate and propionaldehyde (**2k**), and purified by flash column chromatography as colorless oil (20.7 mg, 54%).

$^1\text{H}$  NMR (400 MHz,  $\text{CDCl}_3$ )  $\delta$  7.34 – 7.27 (m, 5H), 5.76 – 5.72 (m, 1H), 2.06 (s, 3H), 1.93 – 1.86 (m, 1H), 1.77 – 1.71 (m, 1H), 1.40 – 1.32 (m, 1H), 1.29 – 1.23 (m, 1H), 0.91 (t,  $J$  = 7.2 Hz, 3H).  $^{13}\text{C}$  NMR (100 MHz,  $\text{CDCl}_3$ )  $\delta$  170.56, 141.00, 128.52, 127.93, 126.65, 76.05, 38.56, 21.42, 18.92, 13.92. IR ( $\text{cm}^{-1}$ ): 3064, 2956, 2870, 1736, 1236, 699. HRMS: calcd. For  $\text{C}_{12}\text{H}_{16}\text{O}_2\text{Na}^+$  [ $\text{M}+\text{Na}$ ] $^+$ : 215.1043; Found: 215.1050.

**(4l) 3-acetoxy-3-phenylpropyl benzoate**

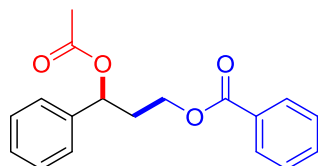

The title compound was prepared according to the general procedure described above by the reaction between styrene (**1a**) with iodobenzene diacetate and 2-oxopropyl benzoate (**2l**), and purified by flash column chromatography as colorless oil (32.2 mg, 54%).

$^1\text{H}$  NMR (400 MHz,  $\text{CDCl}_3$ )  $\delta$  8.02 – 7.98 (m, 2H), 7.56 (t,  $J$  = 7.4 Hz, 1H), 7.44 (t,  $J$  = 7.6 Hz, 2H), 7.37 – 7.28 (m, 5H), 5.97 (dd,  $J$  = 8.0, 6.0 Hz, 1H), 4.42 – 4.28 (m, 2H), 2.45 – 2.36 (m, 1H), 2.30 – 2.22 (m, 1H), 2.07 (s, 3H).  $^{13}\text{C}$  NMR (100 MHz,  $\text{CDCl}_3$ )  $\delta$  170.31, 166.57, 139.99, 133.30, 133.16, 130.14, 129.84, 129.72, 128.78, 128.51, 128.32, 126.55, 73.23, 61.36, 35.49, 21.33. IR ( $\text{cm}^{-1}$ ): 3063, 2962, 2933, 1720, 1275, 700. HRMS: calcd. For  $\text{C}_{18}\text{H}_{18}\text{O}_4\text{Na}^+$  [ $\text{M}+\text{Na}$ ] $^+$ : 321.1097; Found: 321.1083.

**(4m) 2-(2,2-dimethyl-1,3-dioxolan-4-yl)-1-phenylethyl acetate**

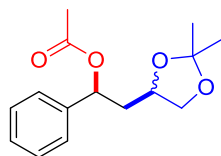

The title compound was prepared according to the general procedure described above by the reaction between styrene (**1a**) with iodobenzene diacetate and (R)-2,2-dimethyl-1,3-dioxolane-4-carbaldehyde (**2m**), and purified by flash column chromatography as colorless oil (33.8 mg, 64%, d.r. = 1.5 : 1).

$^1\text{H}$  NMR (400 MHz,  $\text{CDCl}_3$ )  $\delta$  7.35 – 7.29 (m, 5H), 5.89 – 5.85 (m, 1H), 4.18 – 4.12 (m, 1H), 4.05 – 4.01 (m, 1H), 3.59 – 3.52 (m, 1H), 2.08 (s, 3H), 1.42 – 1.34 (m, 6H), 1.30 (s, 1H), 1.26 (s, 1H).  $^{13}\text{C}$  NMR (100 MHz,  $\text{CDCl}_3$ )  $\delta$  170.18, 140.64, 128.72, 128.20, 126.69, 126.31, 108.93, 73.39,

73.06, 69.60, 41.08, 40.32, 27.13, 25.86, 21.34. IR (cm<sup>-1</sup>): 2959, 2870, 2097, 1245, 699. HRMS: calcd. For C<sub>15</sub>H<sub>20</sub>O<sub>4</sub>Na<sup>+</sup> [M+Na]<sup>+</sup>: 301.1410; Found: 301.1420.

**(6a) 3-methyl-1-phenylbutyl benzoate**

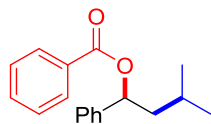

The title compound was prepared according to the general procedure described above by the reaction between styrene (**1a**) with benzoic acid (**5a**) and isobutyraldehyde (**2a**), and purified by flash column chromatography as colorless oil (43.4 mg, 81%).

<sup>1</sup>H NMR (400 MHz, CDCl<sub>3</sub>) δ 8.07 (d, *J* = 8.0 Hz, 2H), 7.56 – 7.52 (m, 1H), 7.45 – 7.41 (m, 4H), 7.34 (t, *J* = 7.6 Hz, 2H), 7.27 (t, *J* = 7.4 Hz, 1H), 6.07 (dd, *J* = 8.8, 4.8 Hz, 1H), 2.05 – 1.99 (m, 1H), 1.74 – 1.66 (m, 2H), 0.97 (dd, *J* = 8.4, 6.4 Hz, 6H). <sup>13</sup>C NMR (100 MHz, CDCl<sub>3</sub>) δ 165.93, 141.32, 132.96, 130.62, 129.71, 128.57, 128.42, 127.94, 126.52, 75.29, 45.82, 24.95, 23.01, 22.47. IR (cm<sup>-1</sup>): 3089, 3064, 2957, 2870, 1716, 1271, 712. HRMS: calcd. For C<sub>18</sub>H<sub>20</sub>O<sub>2</sub>Na<sup>+</sup> [M+Na]<sup>+</sup>: 291.1356; Found: 291.1360.

**(6b) 3-methyl-1-phenylbutyl 4-fluorobenzoate**

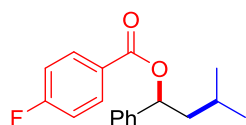

The title compound was prepared according to the general procedure described above by the reaction between styrene (**1a**) with 4-fluorobenzoic acid (**5b**) and isobutyraldehyde (**2a**), and purified by flash column chromatography as colorless oil (42.3 mg, 74%).

<sup>1</sup>H NMR (400 MHz, CDCl<sub>3</sub>) δ 8.08 (dd, *J* = 8.8, 5.6 Hz, 2H), 7.41 (d, *J* = 7.6 Hz, 2H), 7.34 (t, *J* = 7.4 Hz, 2H), 7.30 – 7.26 (m, 1H), 7.10 (t, *J* = 8.6 Hz, 2H), 6.05 (dd, *J* = 8.4, 4.8 Hz, 1H), 2.06 – 2.00 (m, 1H), 1.75 – 1.63 (m, 2H), 0.98 (dd, *J* = 9.2, 6.4 Hz, 6H). <sup>13</sup>C NMR (100 MHz, CDCl<sub>3</sub>) δ 167.13, 165.04, 164.61, 141.18, 132.33, 132.23, 128.65, 128.07, 126.57, 115.71, 115.49, 75.55, 45.76, 24.98, 23.00, 22.51. IR (cm<sup>-1</sup>): 2958, 2871, 2837, 1736, 1073, 699. HRMS: calcd. For C<sub>18</sub>H<sub>19</sub>FO<sub>2</sub>Na<sup>+</sup> [M+Na]<sup>+</sup>: 309.1261; Found: 309.1257.

**(6c) 4-methoxybenzoic acid**

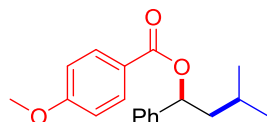

The title compound was prepared according to the general procedure described above by the reaction between styrene (**1a**) with 4-methoxybenzoic acid (**5c**) and isobutyraldehyde (**2a**), and purified by flash column chromatography as colorless oil (50.1 mg, 84%).

<sup>1</sup>H NMR (400 MHz, CDCl<sub>3</sub>) δ 8.03 (d, *J* = 8.8 Hz, 2H), 7.41 (d, *J* = 7.2 Hz, 2H), 7.34 (t, *J* = 7.4 Hz, 2H), 7.29 – 7.25 (m, 1H), 6.92 (d, *J* = 9.2 Hz, 2H), 6.03 (dd, *J* = 8.8, 5.2 Hz, 1H), 3.85 (s, 3H), 2.06 – 1.97 (m, 1H), 1.74 – 1.64 (m, 2H), 0.97 (dd, *J* = 8.0, 6.4 Hz, 6H). <sup>13</sup>C NMR (100 MHz, CDCl<sub>3</sub>) δ

165.76, 163.44, 141.58, 131.77, 128.57, 127.87, 126.51, 123.05, 113.70, 77.48, 77.16, 76.84, 74.95, 55.54, 45.91, 24.97, 23.06, 22.51. IR (cm<sup>-1</sup>): 3018, 2871, 2834, 1746, 1073, 699. HRMS: calcd. For C<sub>19</sub>H<sub>22</sub>O<sub>3</sub>Na<sup>+</sup> [M+Na]<sup>+</sup>: 321.1461; Found: 321.1476.

**(6d) 3-methyl-1-phenylbutyl 2-naphthoate**

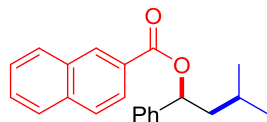

The title compound was prepared according to the general procedure described above by the reaction between styrene (**1a**) with 2-naphthoic acid (**5d**) and isobutyraldehyde (**2a**), and purified by flash column chromatography as colorless oil (50 mg, 79%).

<sup>1</sup>H NMR (400 MHz, CDCl<sub>3</sub>)  $\delta$  8.63 (s, 1H), 8.09 (dd,  $J$  = 8.4, 1.2 Hz, 1H), 7.96 (d,  $J$  = 8.0 Hz, 1H), 7.87 (d,  $J$  = 8.4 Hz, 2H), 7.60 – 7.52 (m, 2H), 7.47 (d,  $J$  = 7.2 Hz, 2H), 7.36 (t,  $J$  = 7.4 Hz, 2H), 7.29 (d,  $J$  = 7.2 Hz, 1H), 6.13 (dd,  $J$  = 8.8, 4.8 Hz, 1H), 2.13 – 2.06 (m, 1H), 1.80 – 1.71 (m, 2H), 1.01 (dd,  $J$  = 9.6, 6.4 Hz, 6H). <sup>13</sup>C NMR (100 MHz, CDCl<sub>3</sub>)  $\delta$  166.18, 141.40, 135.67, 132.65, 131.17, 129.49, 128.65, 128.33, 128.25, 128.01, 127.89, 126.74, 126.64, 125.46, 75.51, 45.89, 25.05, 23.07, 22.57. IR (cm<sup>-1</sup>): 2958, 2871, 2837, 1736, 1073, 699. HRMS: calcd. For C<sub>22</sub>H<sub>22</sub>O<sub>2</sub>Na<sup>+</sup> [M+Na]<sup>+</sup>: 341.1512; Found: 341.1517.

**(6e) 3-methyl-1-phenylbutyl furan-2-carboxylate**

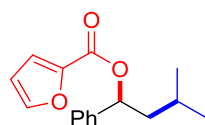

The title compound was prepared according to the general procedure described above by the reaction between styrene (**1a**) with furan-2-carboxylic acid (**5e**) and isobutyraldehyde (**2a**), and purified by flash column chromatography as colorless oil (30 mg, 58%).

<sup>1</sup>H NMR (400 MHz, CDCl<sub>3</sub>)  $\delta$  7.57 (s, 1H), 7.41 (d,  $J$  = 7.2 Hz, 2H), 7.34 (t,  $J$  = 7.0 Hz, 2H), 7.29 (d,  $J$  = 6.4 Hz, 1H), 7.20 (s, 1H), 6.50 (s, 1H), 6.06 – 6.03 (m, 1H), 2.01 (t,  $J$  = 8.0 Hz, 1H), 1.73 – 1.64 (m, 2H), 0.97 (t,  $J$  = 5.6 Hz, 6H). <sup>13</sup>C NMR (100 MHz, CDCl<sub>3</sub>)  $\delta$  158.26, 146.39, 145.10, 140.92, 128.63, 128.11, 126.71, 117.99, 111.89, 75.32, 45.62, 24.93, 23.00, 22.49. IR (cm<sup>-1</sup>): 2958, 2871, 2837, 1736, 1073, 699. HRMS: calcd. For C<sub>16</sub>H<sub>18</sub>O<sub>3</sub>Na<sup>+</sup> [M+Na]<sup>+</sup>: 281.1148; Found: 281.1151.

**(6f) 3-methyl-1-phenylbutyl thiophene-2-carboxylate**

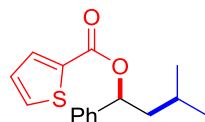

The title compound was prepared according to the general procedure described above by the reaction between styrene (**1a**) with thiophene-2-carboxylic acid (**5f**) and isobutyraldehyde (**2a**), and purified by flash column chromatography as colorless oil (35.1 mg, 64%).

$^1\text{H}$  NMR (400 MHz,  $\text{CDCl}_3$ )  $\delta$  7.81 (d,  $J = 3.2$  Hz, 1H), 7.55 (d,  $J = 4.8$  Hz, 1H), 7.41 (d,  $J = 7.6$  Hz, 2H), 7.34 (t,  $J = 7.4$  Hz, 2H), 7.29 (d,  $J = 7.2$  Hz, 1H), 7.09 (t,  $J = 4.4$  Hz, 1H), 6.01 (dd,  $J = 8.8, 4.8$  Hz, 1H), 2.03 – 1.99 (m, 1H), 1.70 – 1.67 (m, 2H), 0.98 (t,  $J = 6.2$  Hz, 6H).  $^{13}\text{C}$  NMR (100 MHz,  $\text{CDCl}_3$ )  $\delta$  161.71, 141.15, 134.32, 133.51, 132.42, 128.63, 128.04, 127.86, 126.58, 75.64, 45.80, 24.99, 23.05, 22.52. IR ( $\text{cm}^{-1}$ ): 2958, 2871, 2837, 1736, 1073, 699. HRMS: calcd. For  $\text{C}_{16}\text{H}_{18}\text{O}_2\text{SNa}^+ [\text{M}+\text{Na}]^+$ : 297.0920; Found: 297.0936.

## V. References

<sup>1</sup>D. Basavaiah & S. Bhaskar Raju, *Synthetic Communications*, 1991, **21**, 1859.

<sup>2</sup>D. V. Banthorpe, E. D. Hughes and Christopher Ingold Sir, *J. Chem. Soc.*, 1960, 4054.

## VI. Copies of $^1\text{H}$ and $^{13}\text{C}$ NMR spectra of products 3a-3m, 4b-4m, 6a-6f

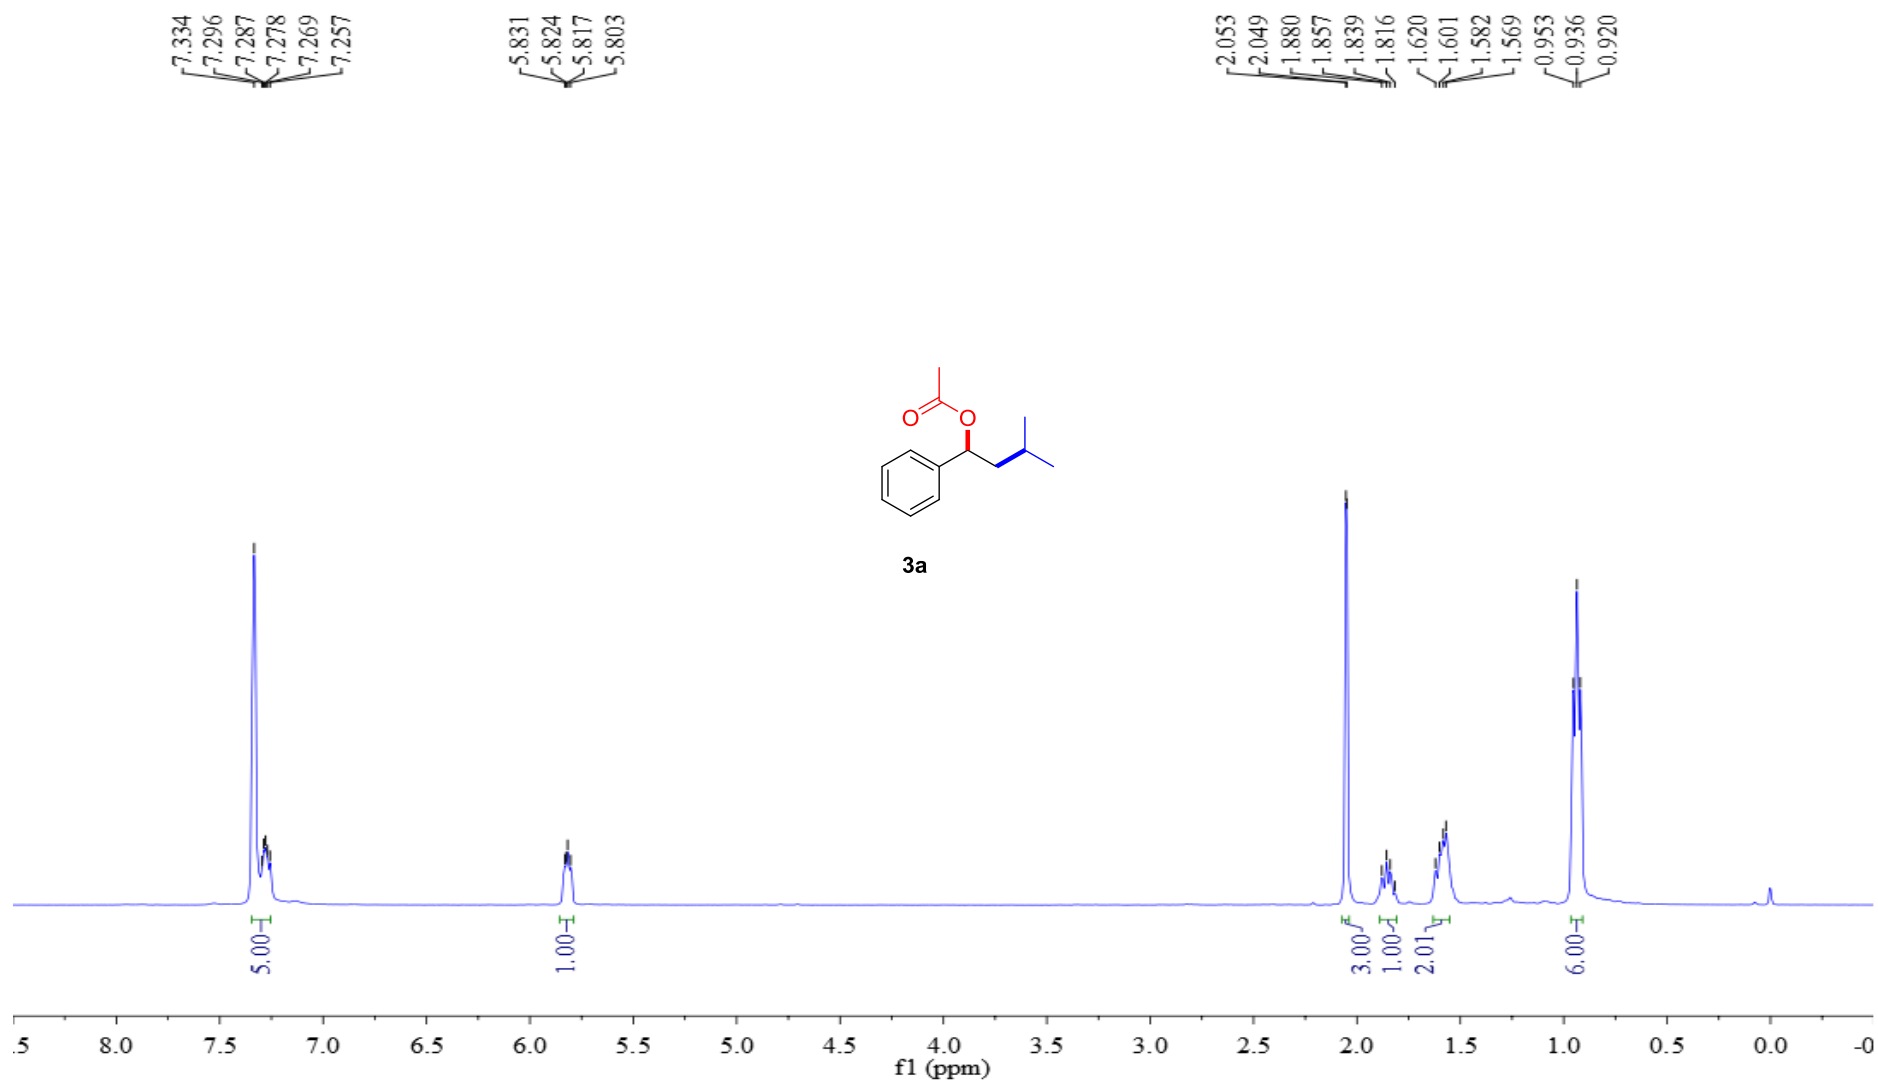

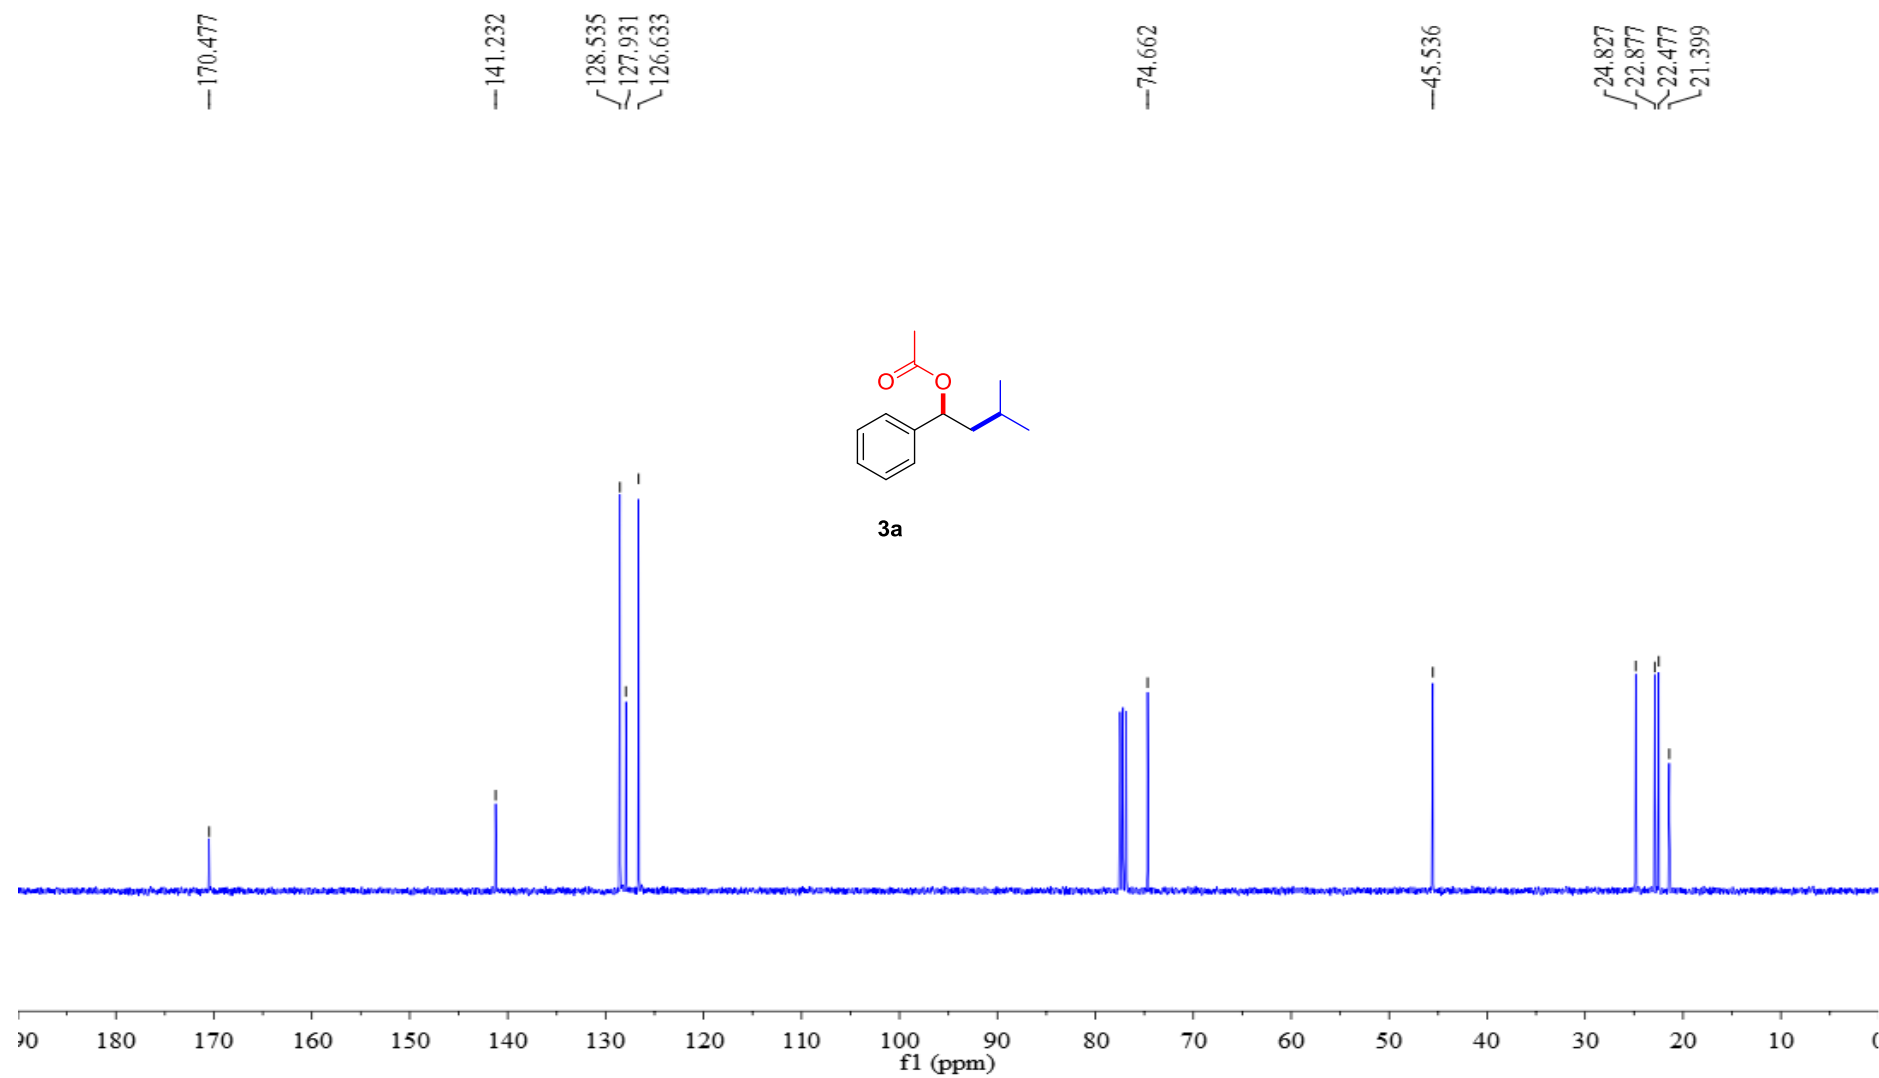



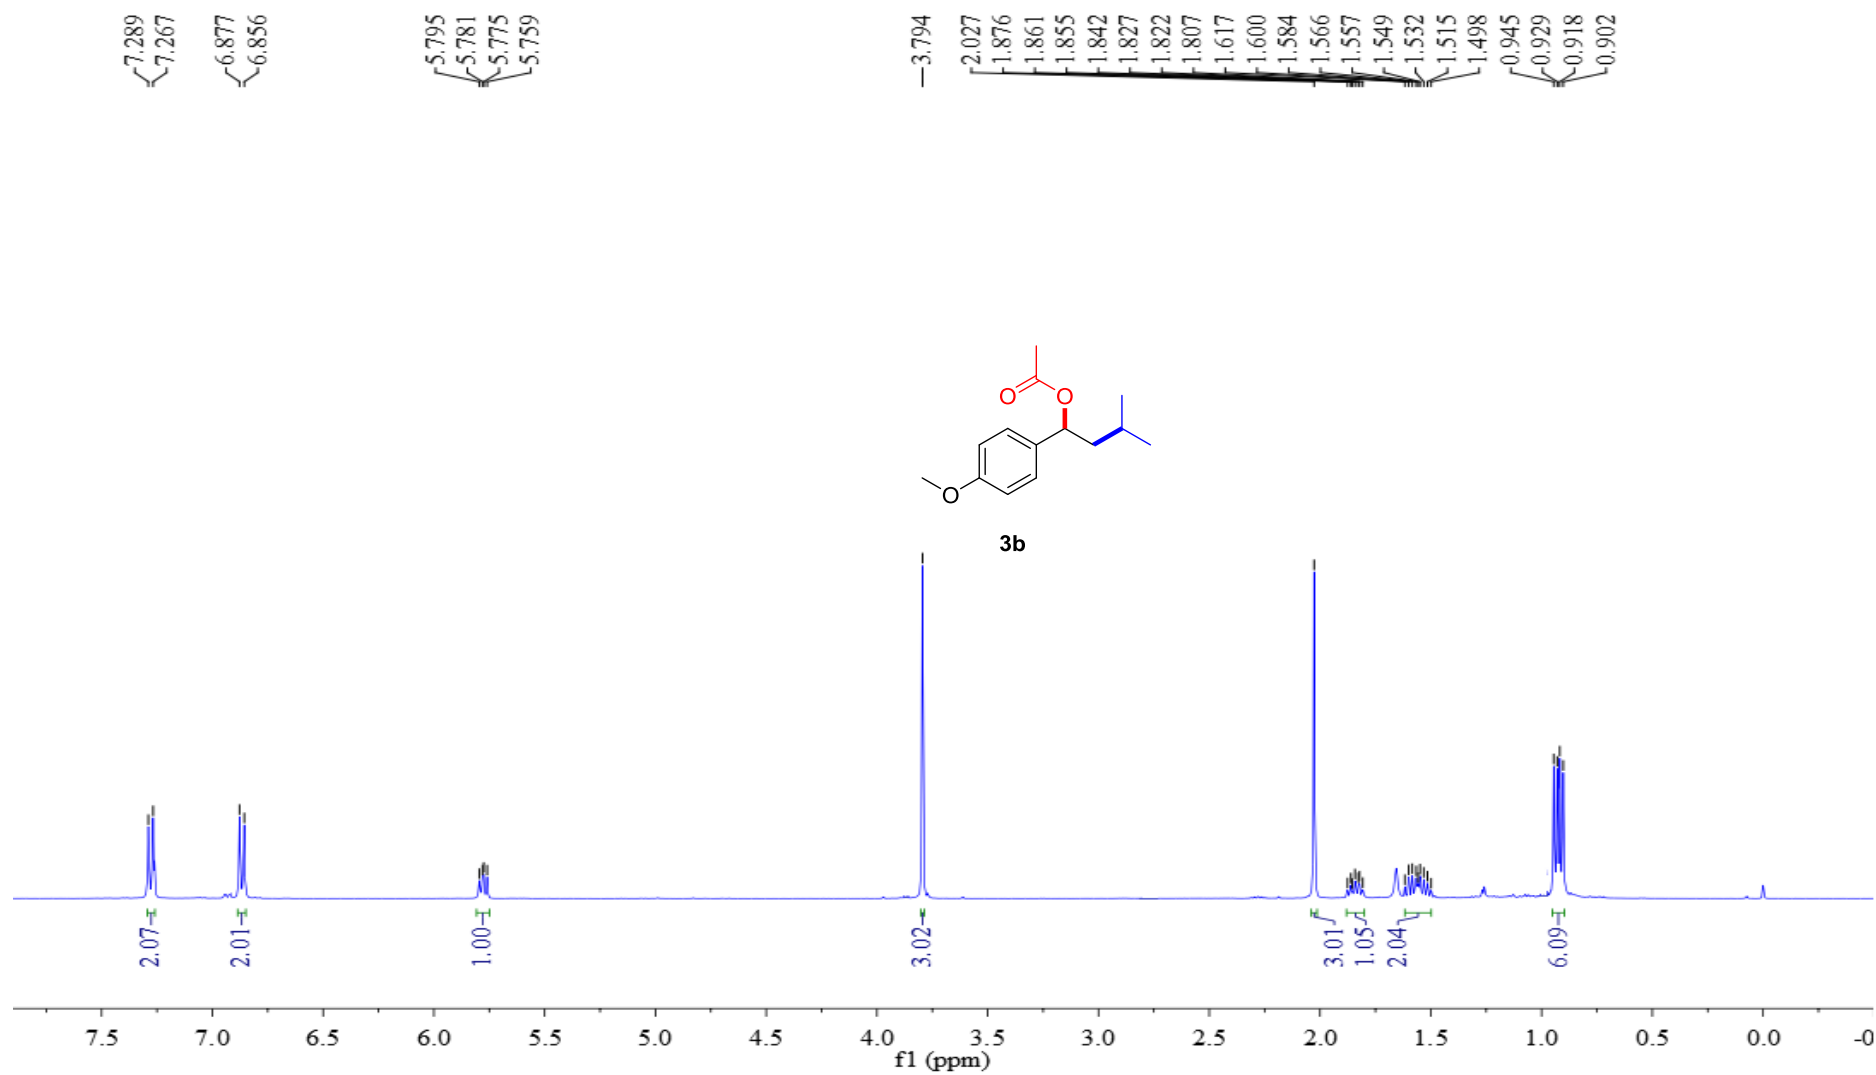

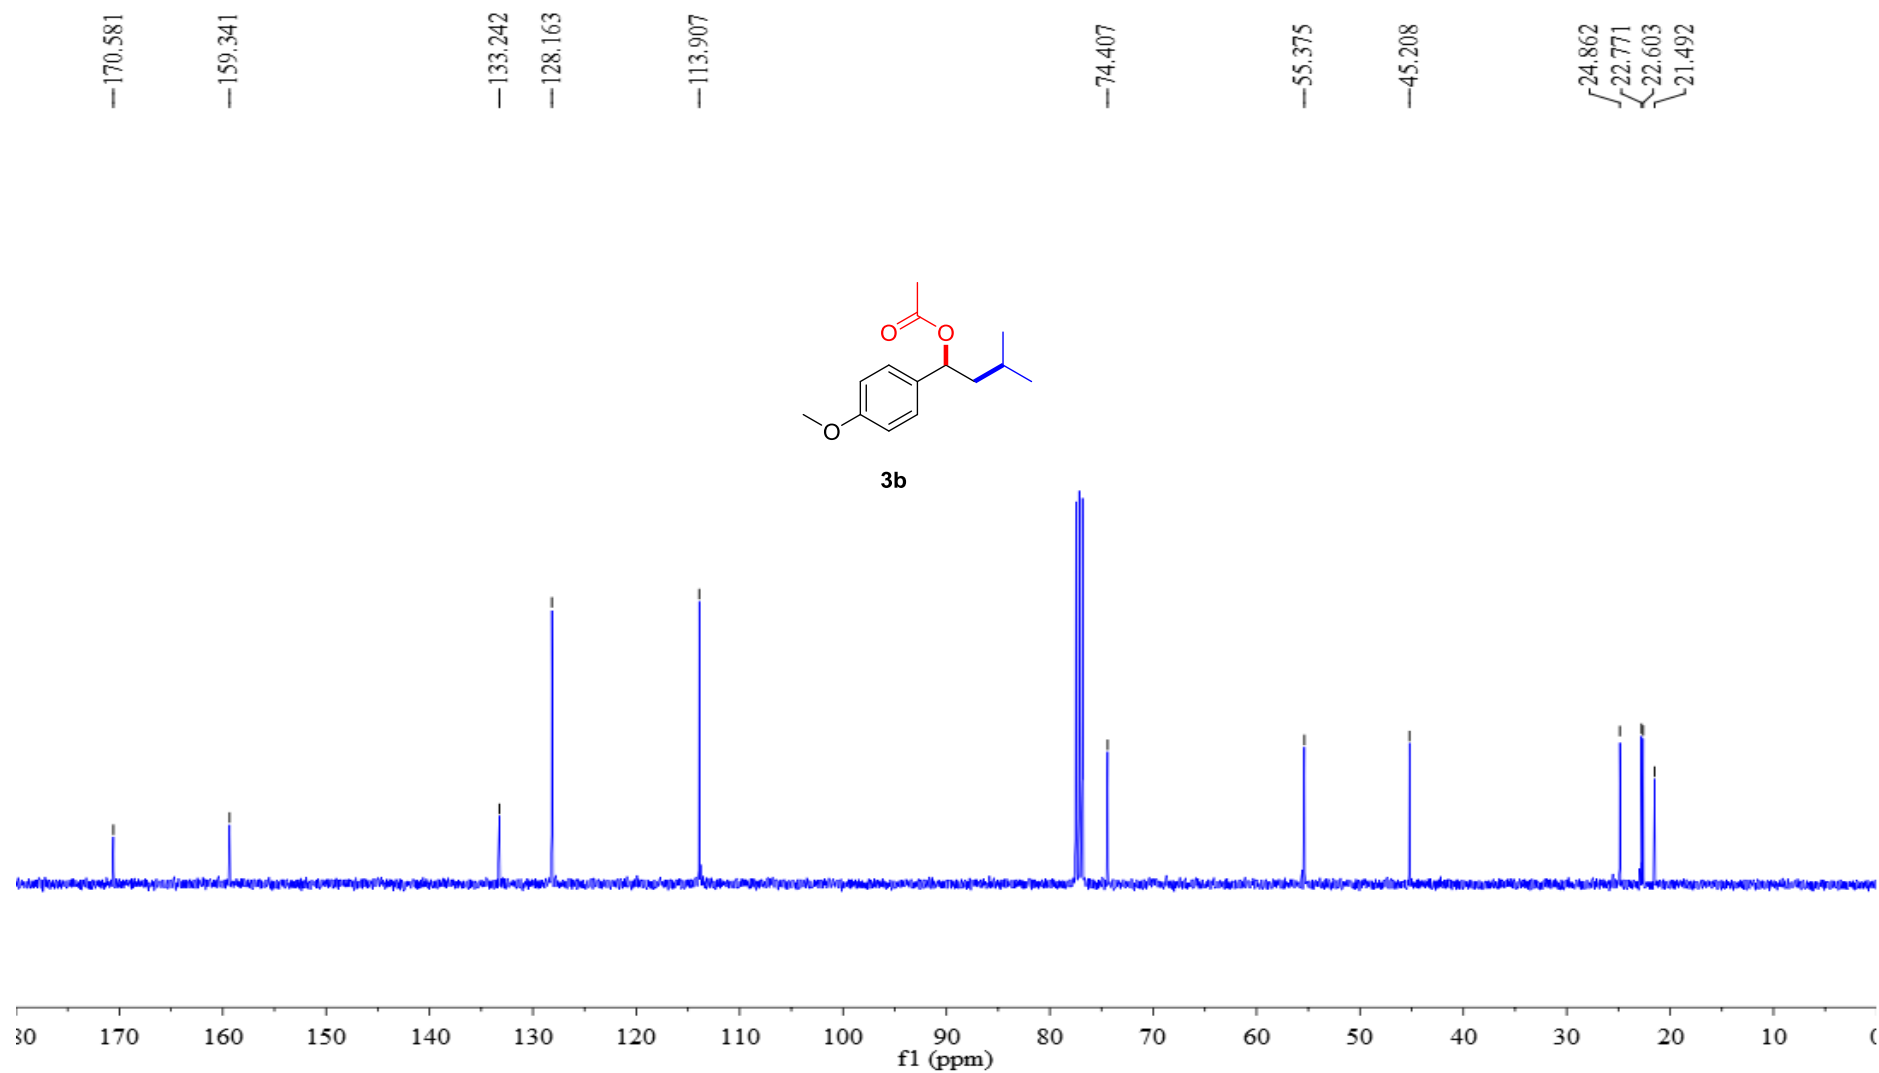

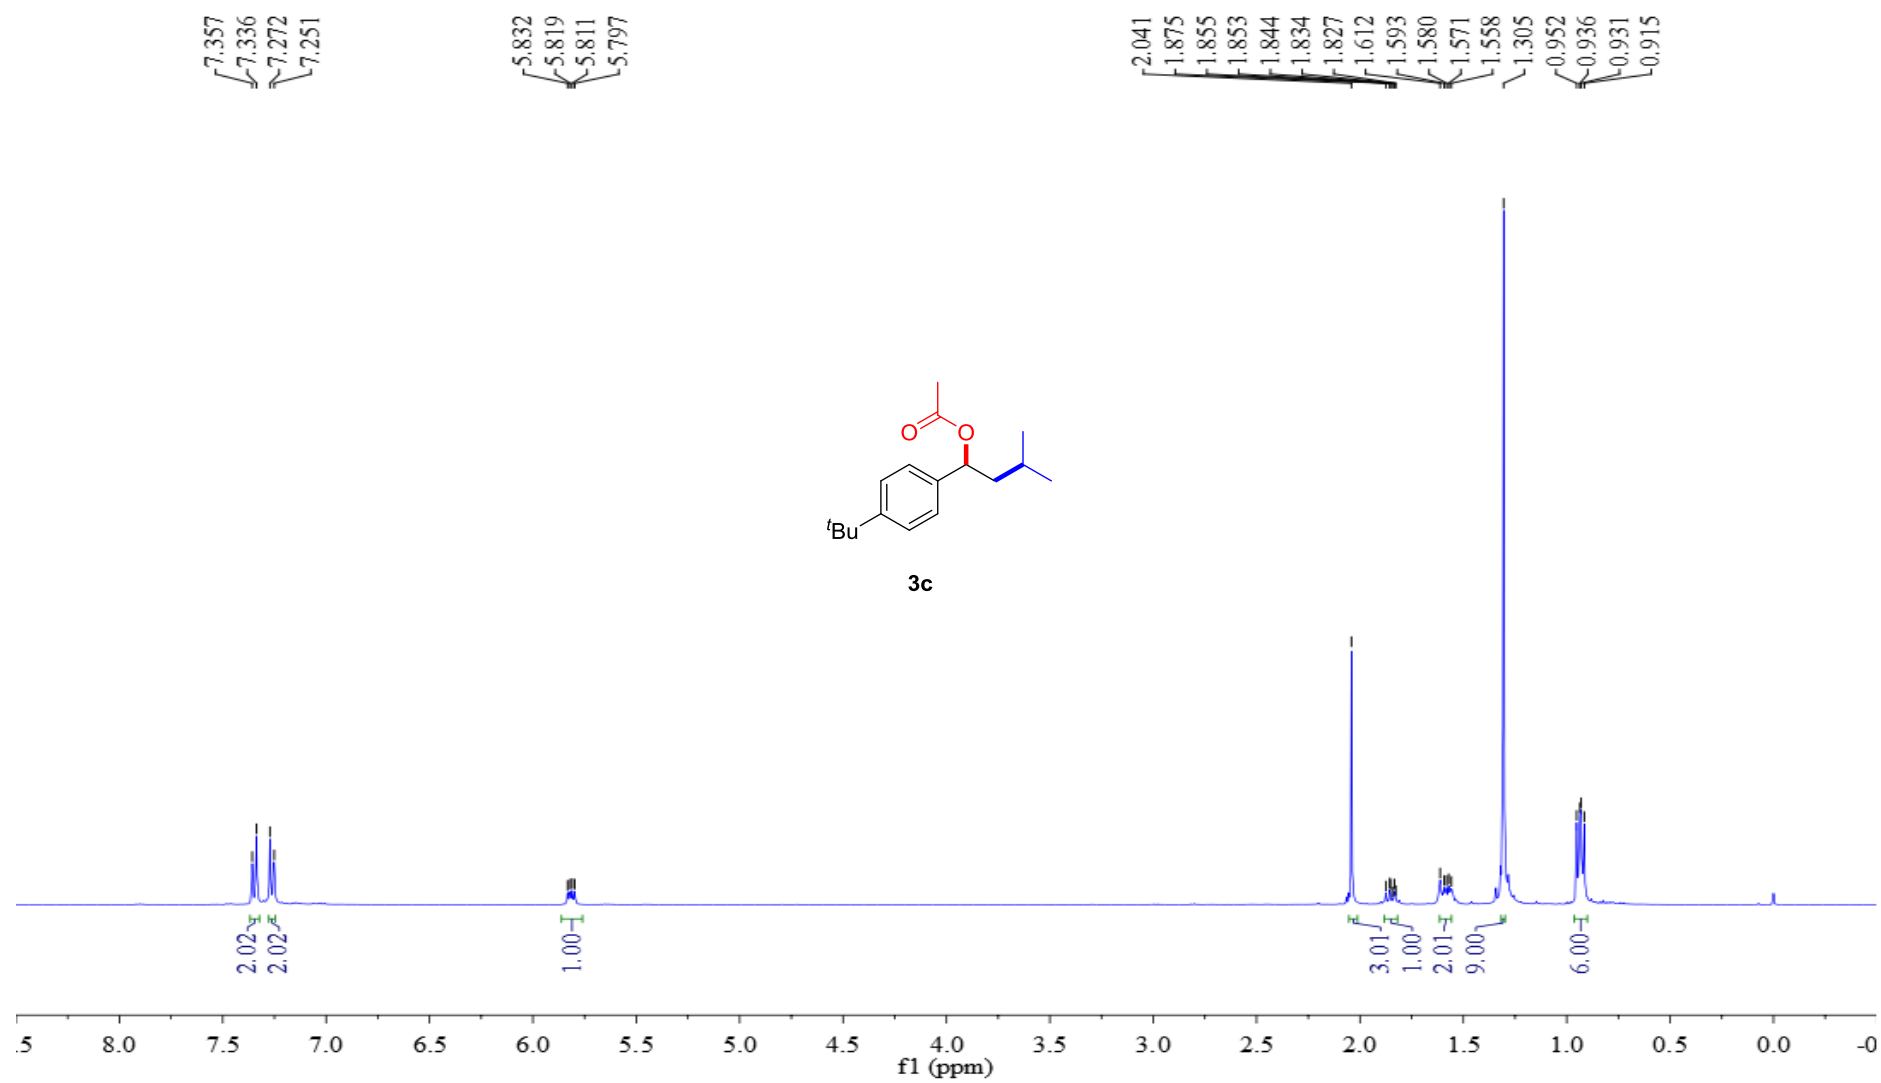

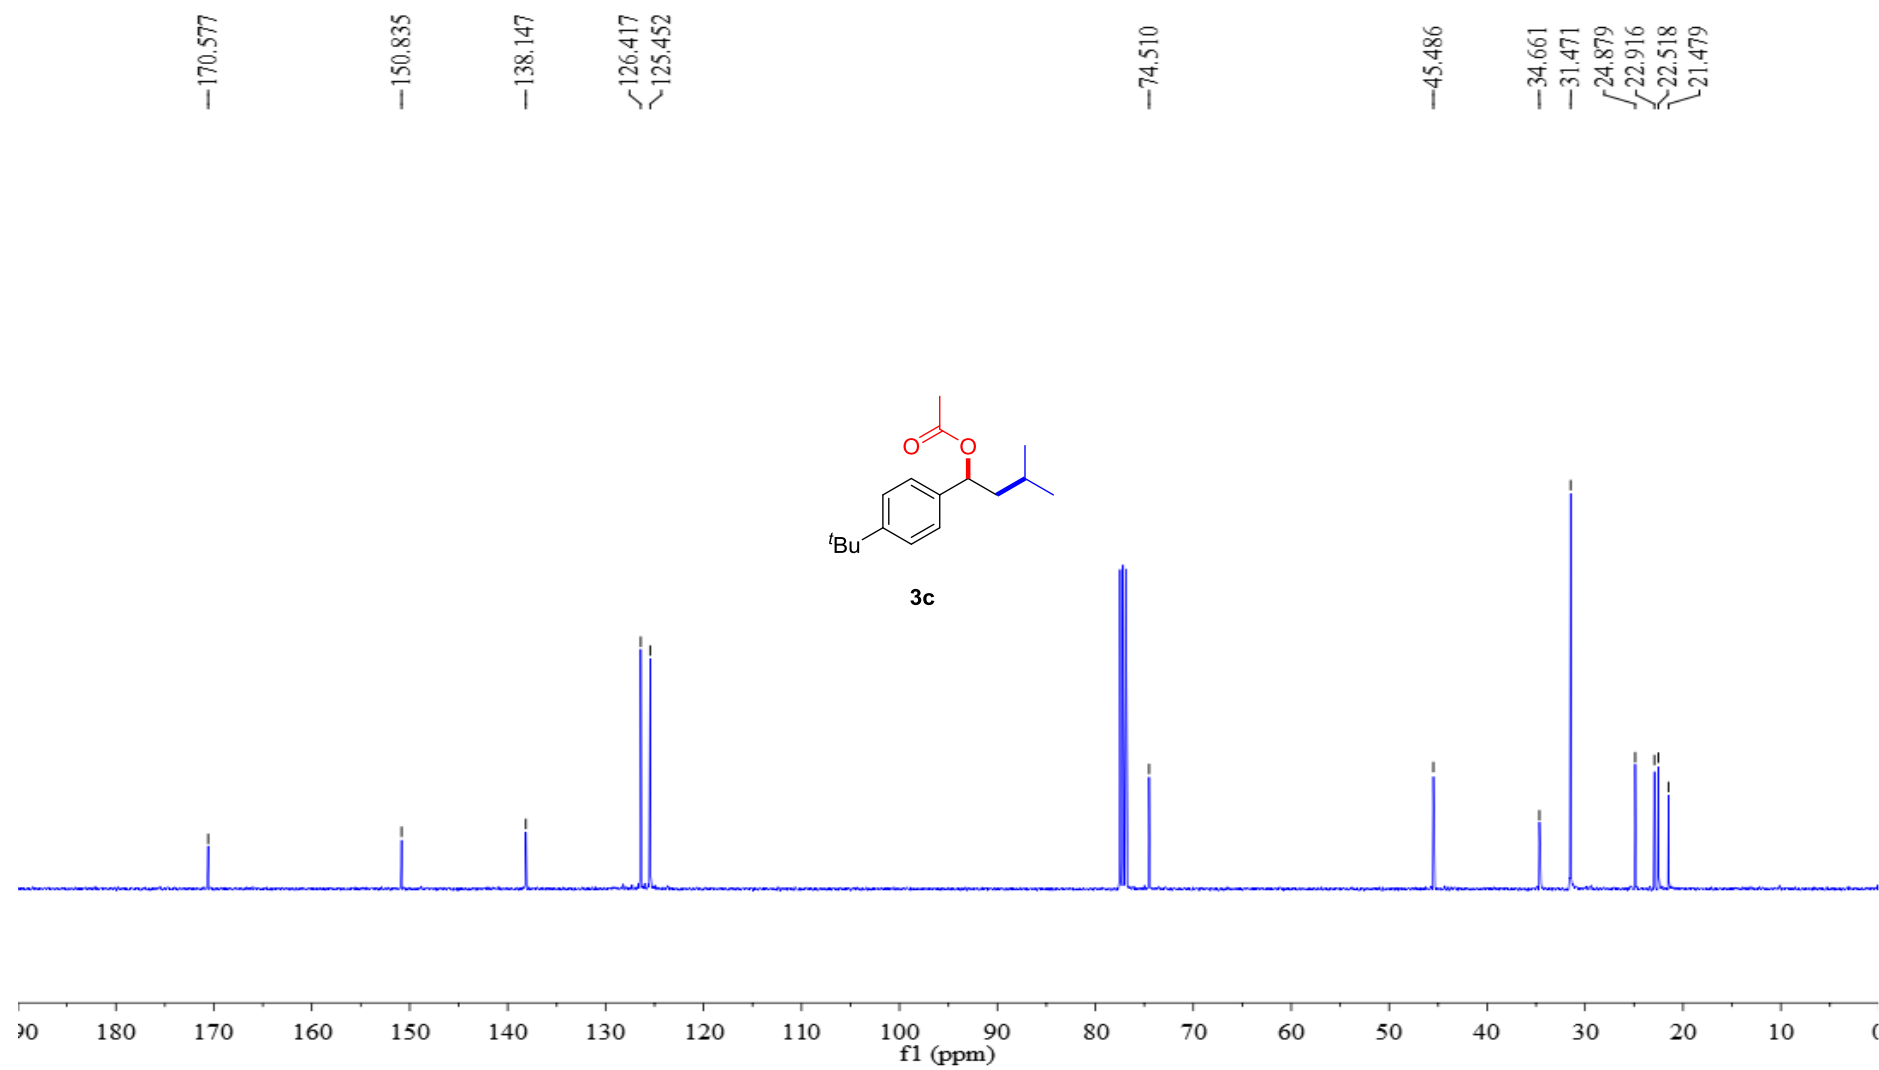

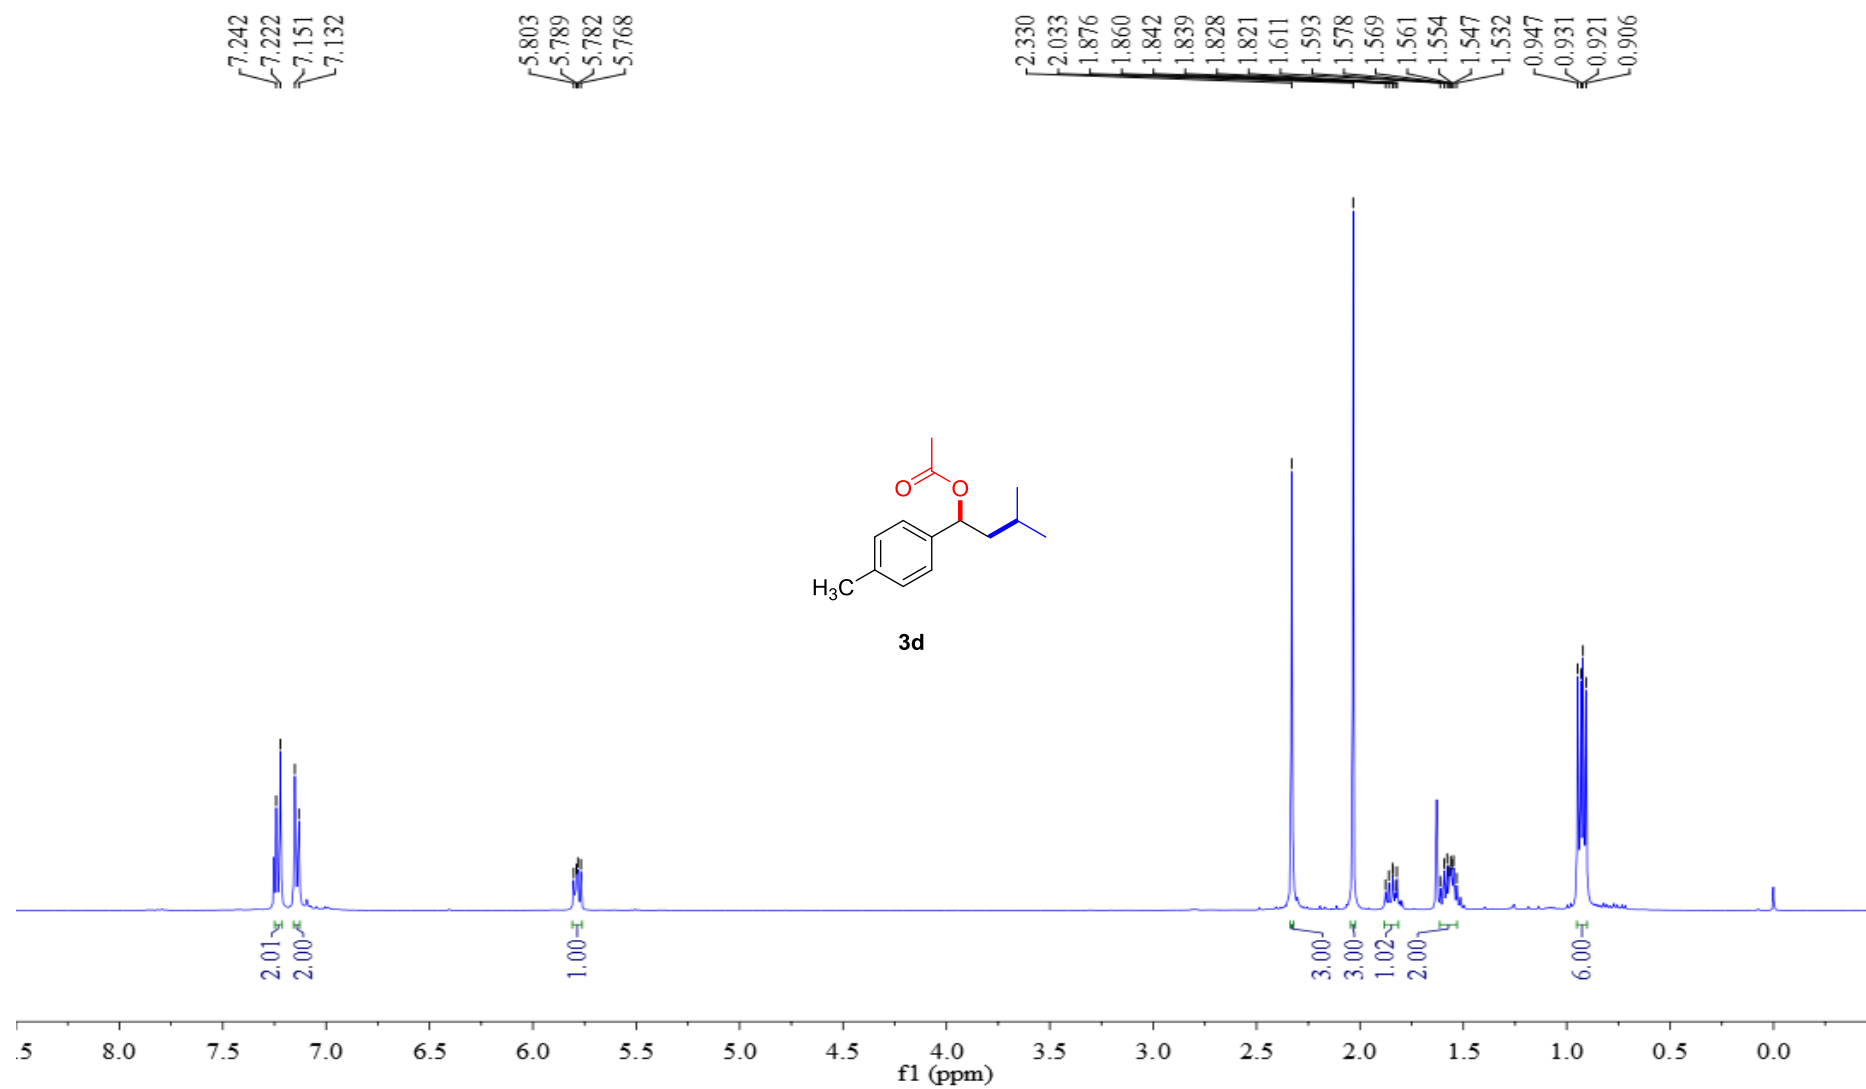

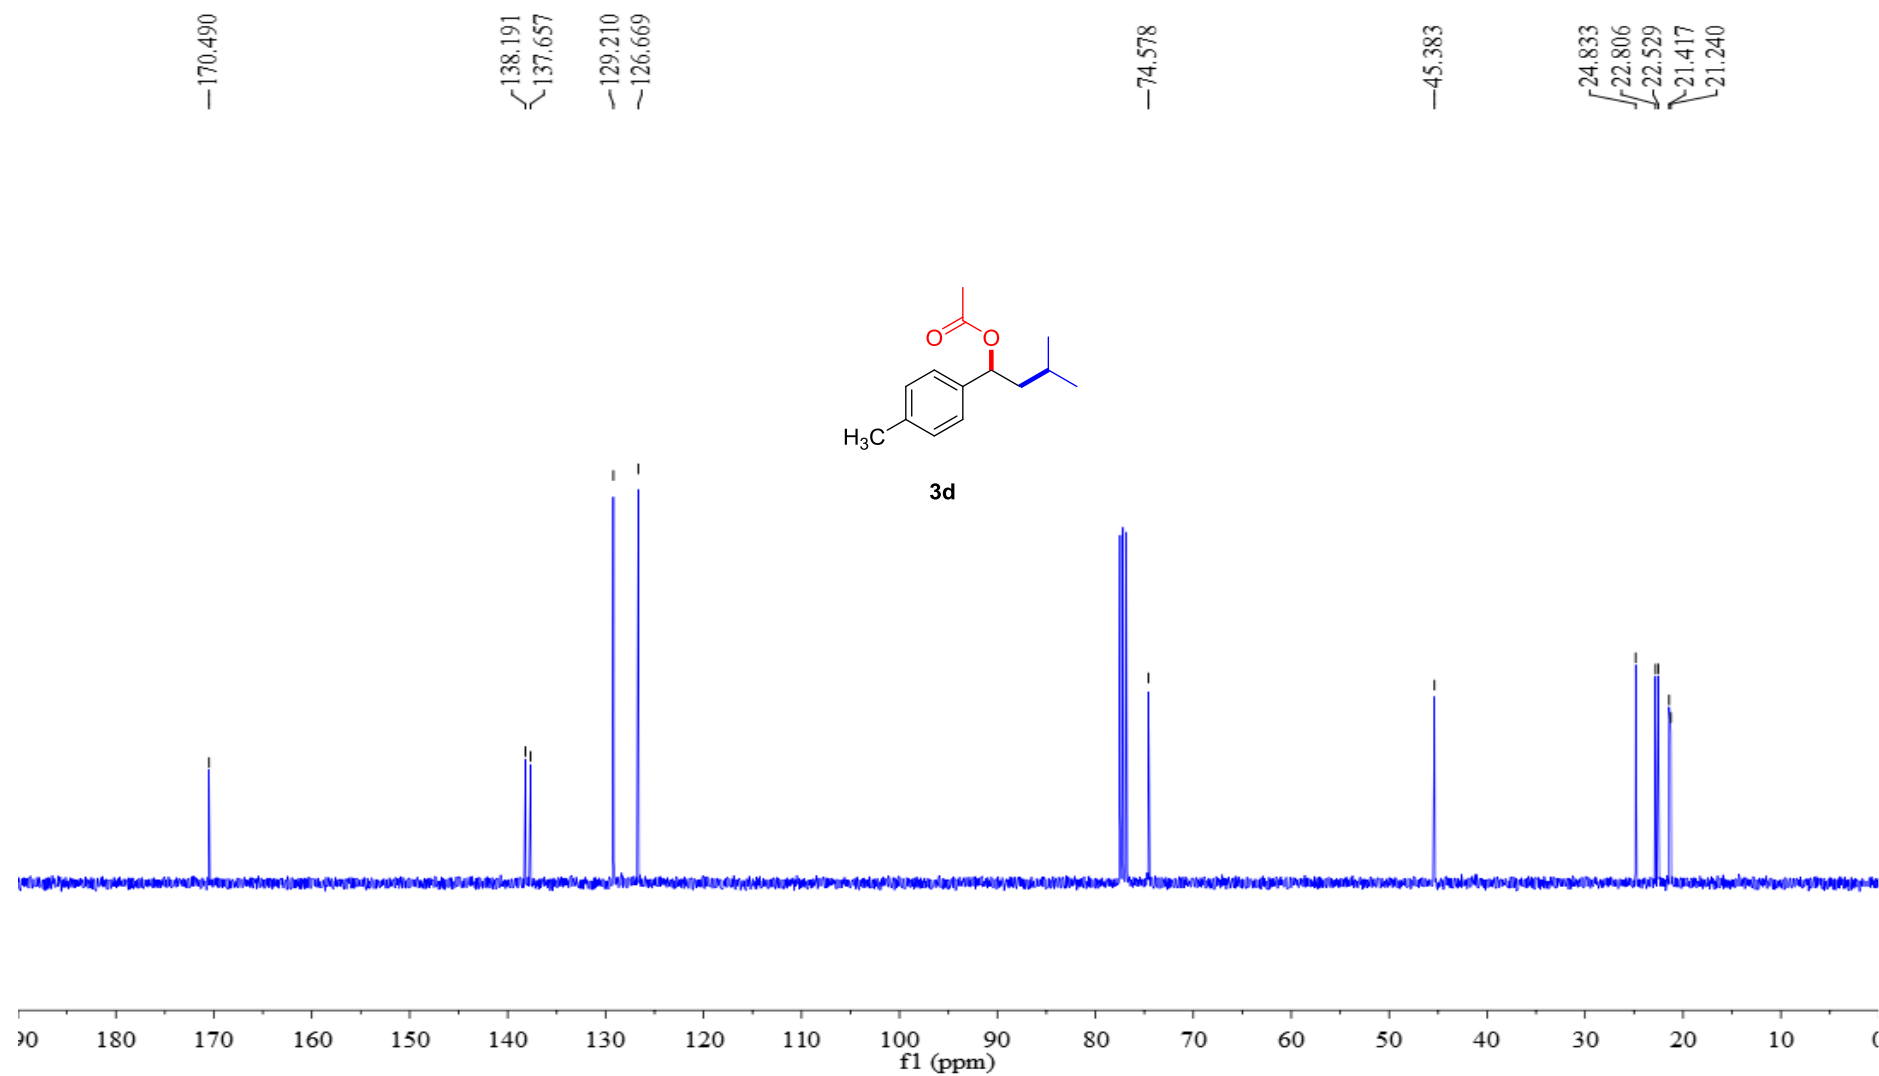

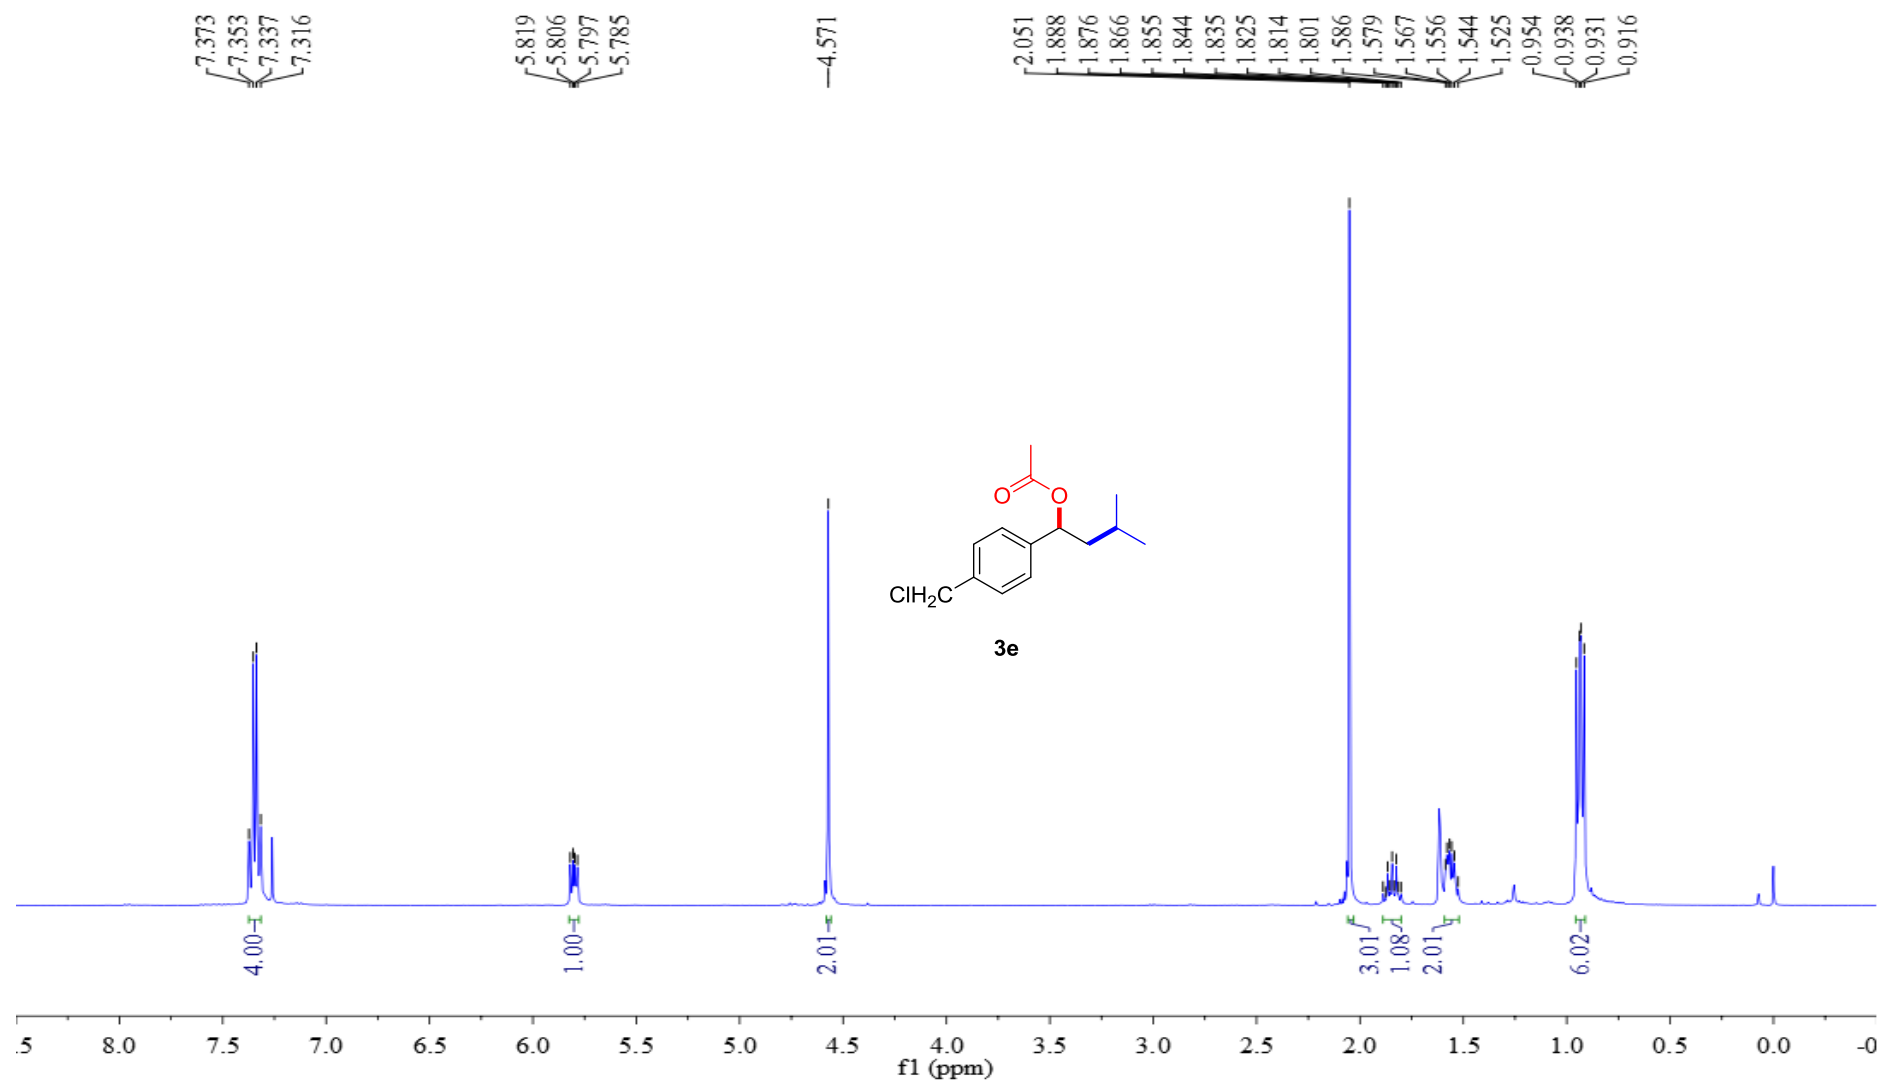

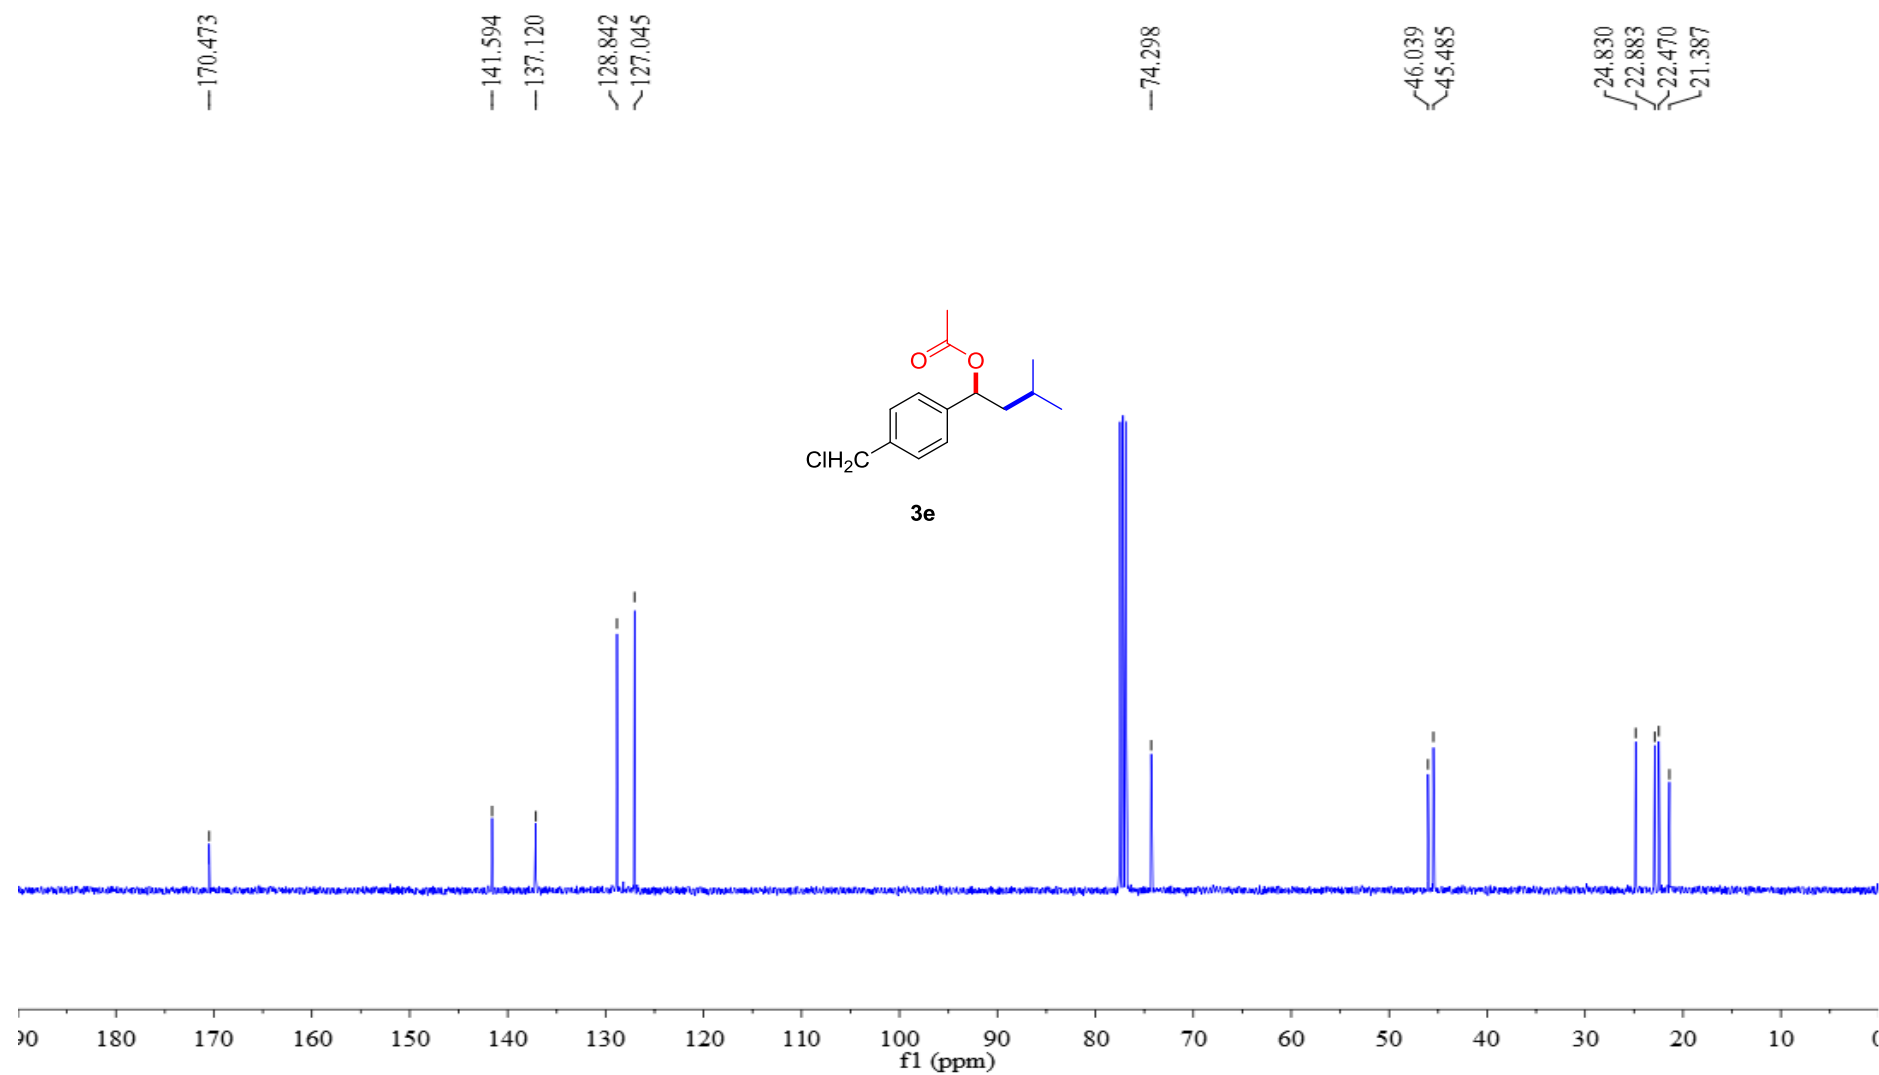



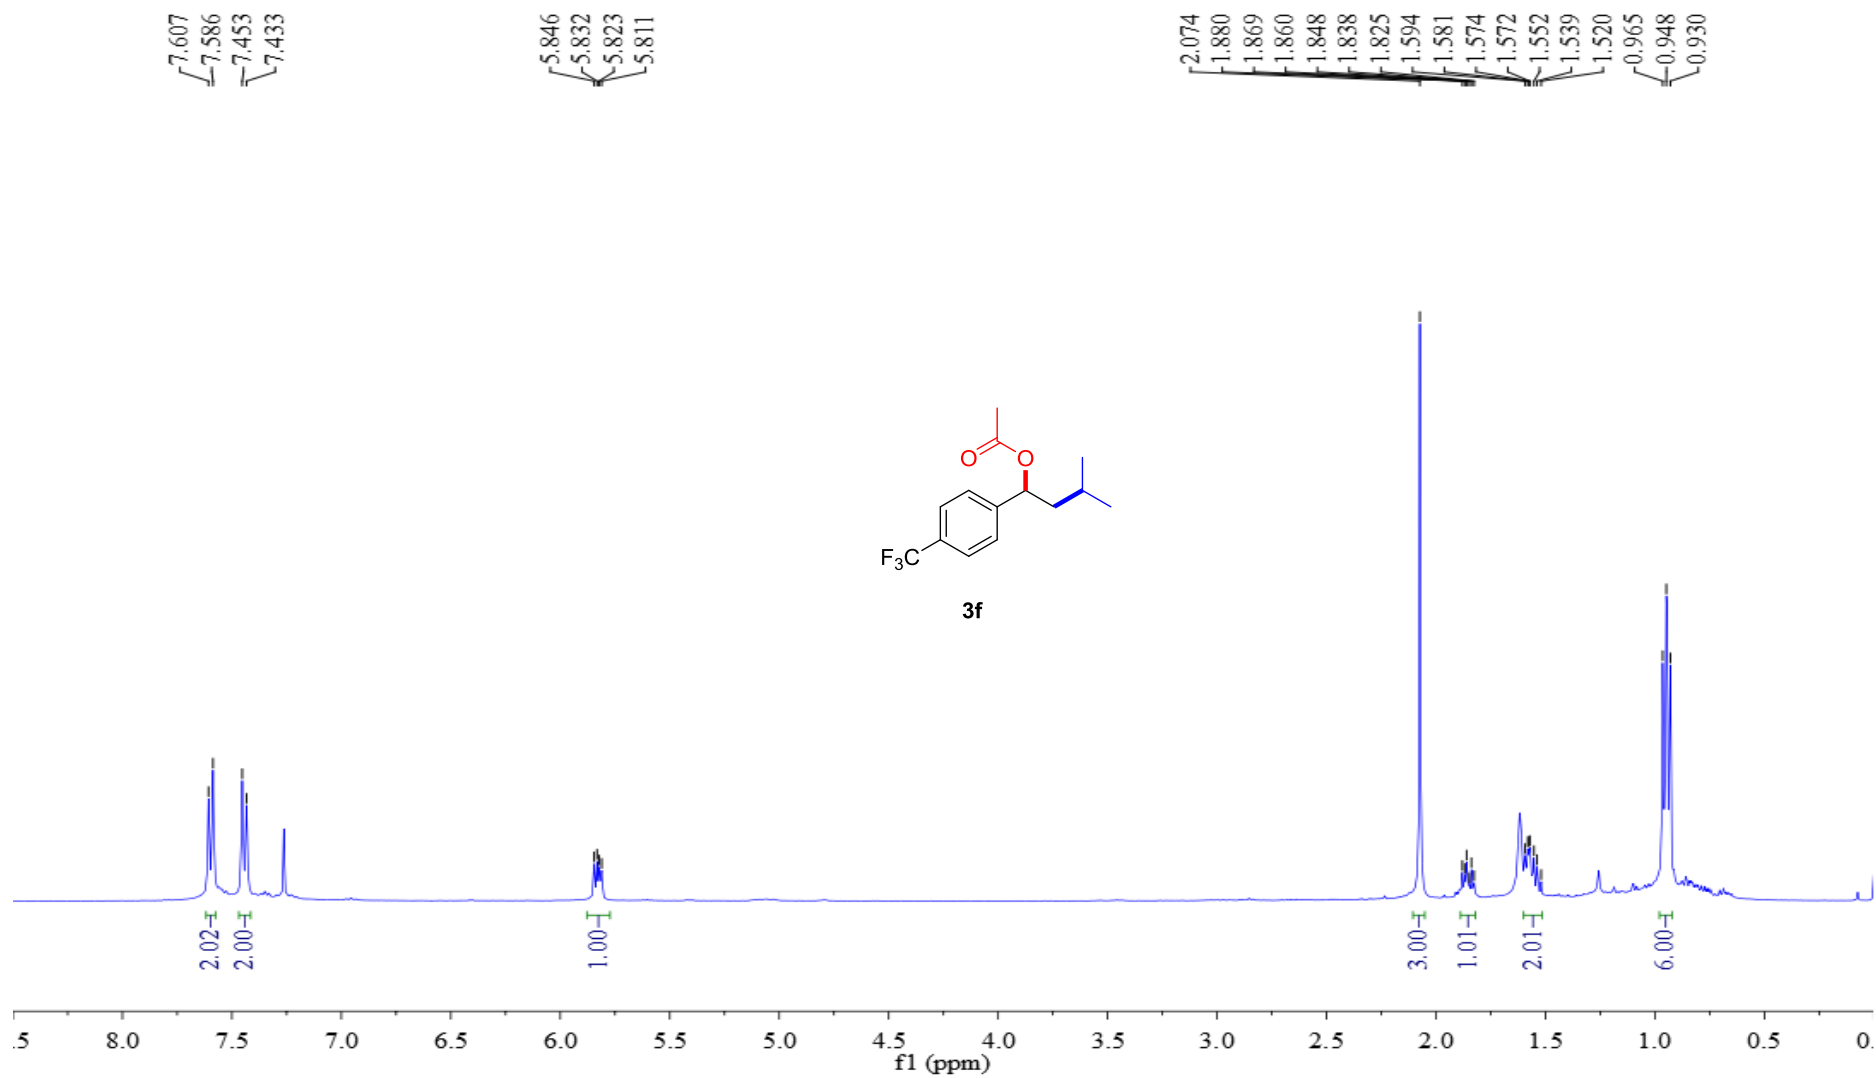

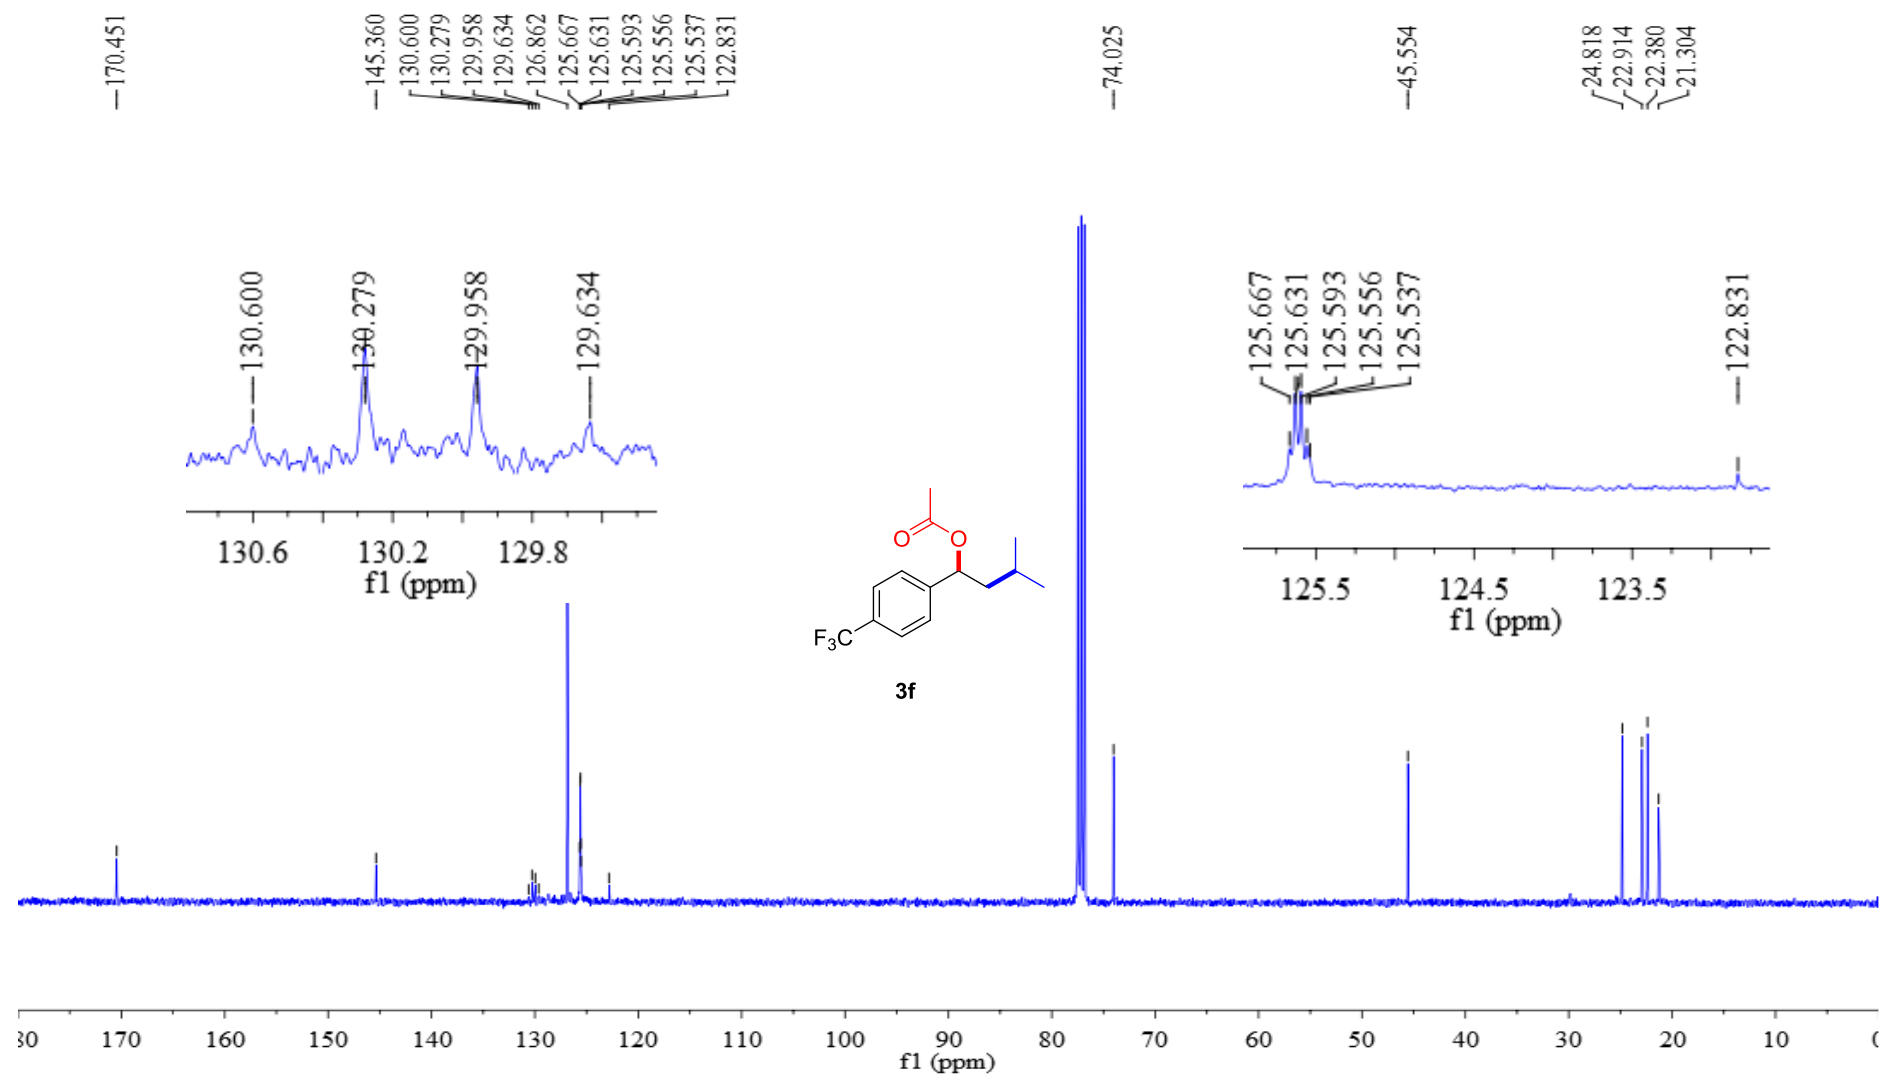

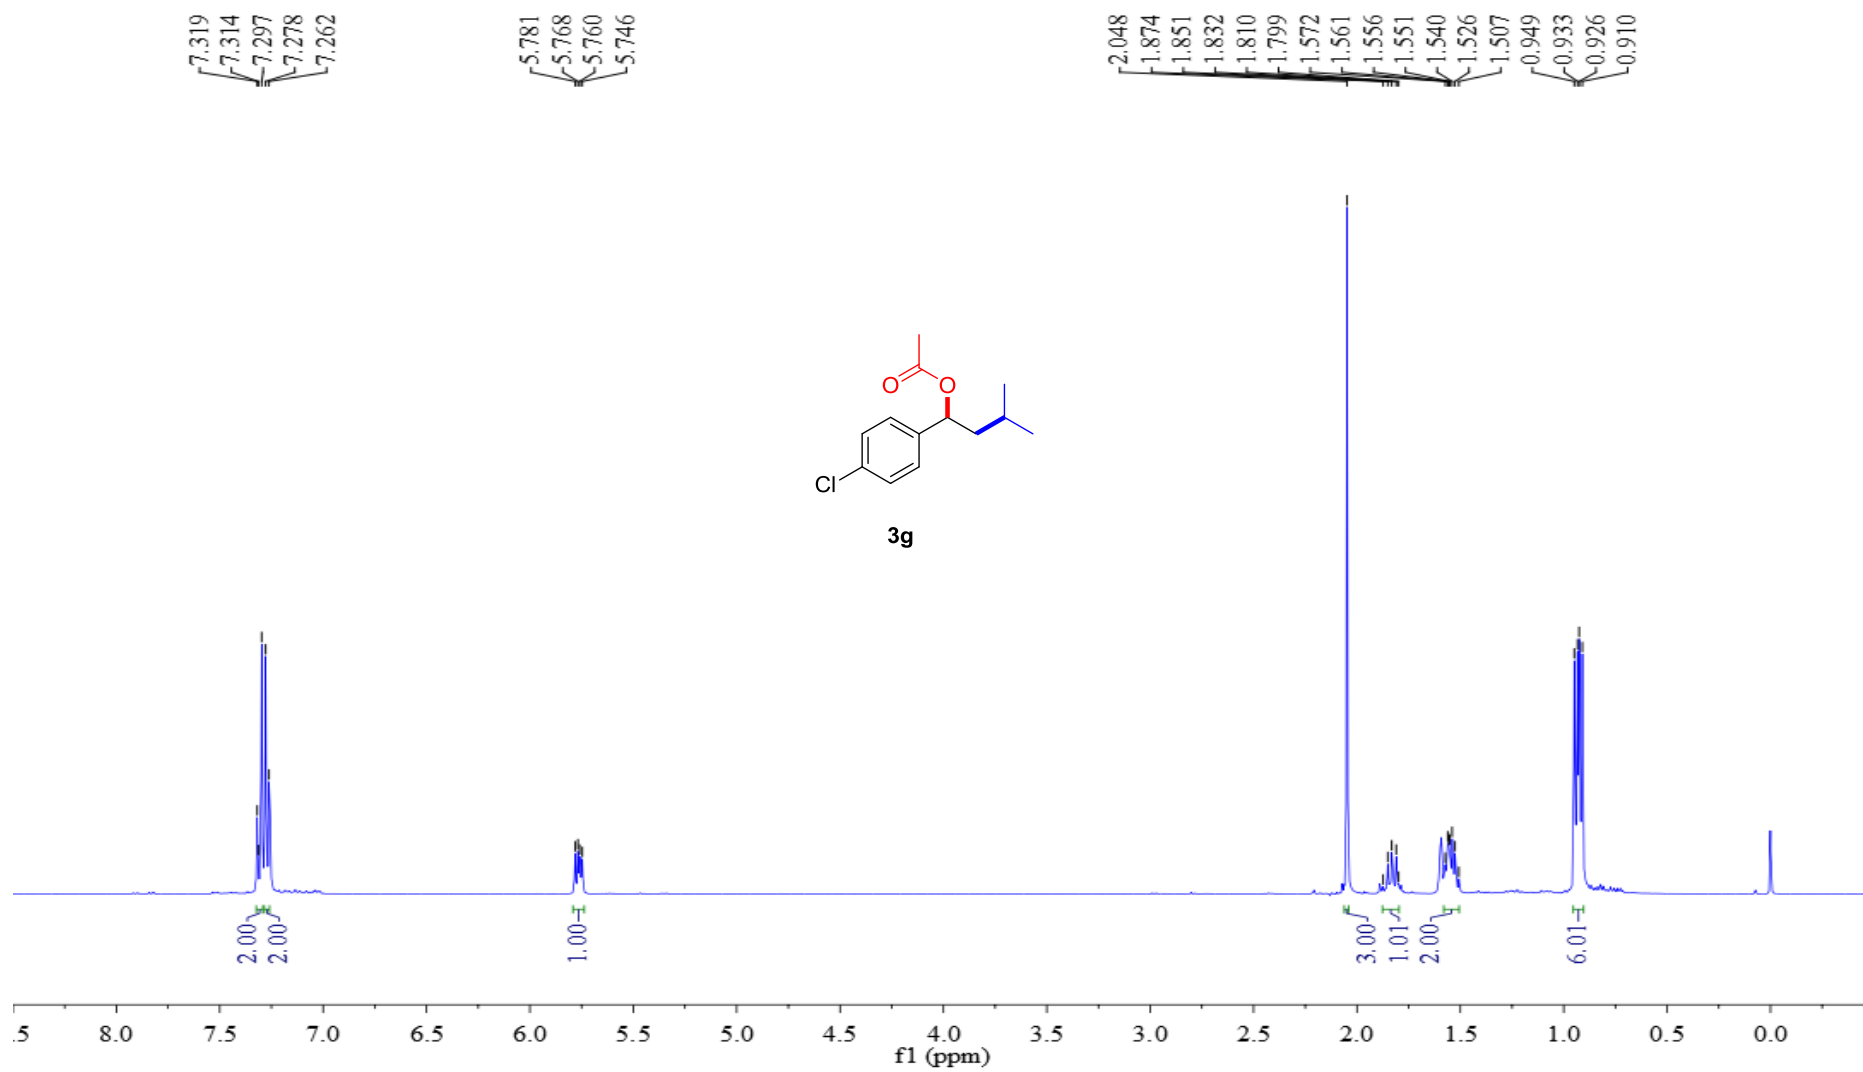

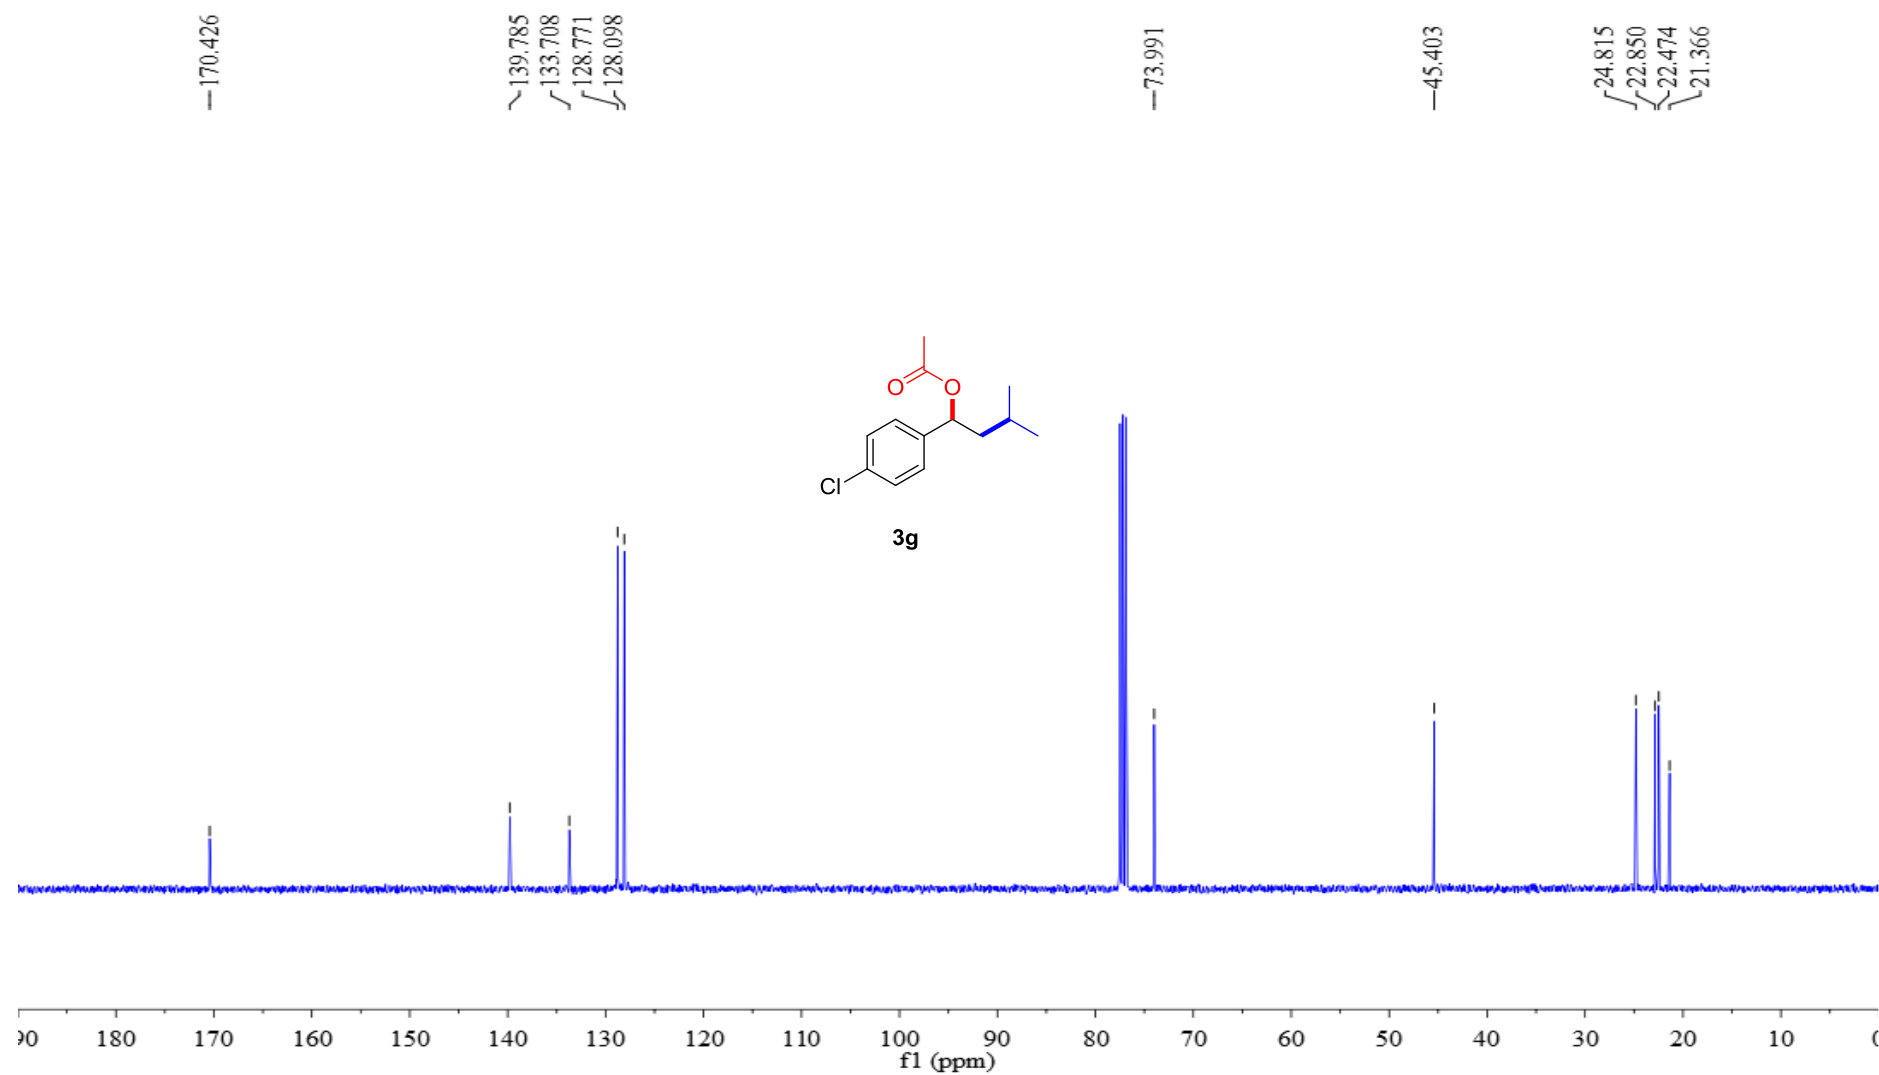

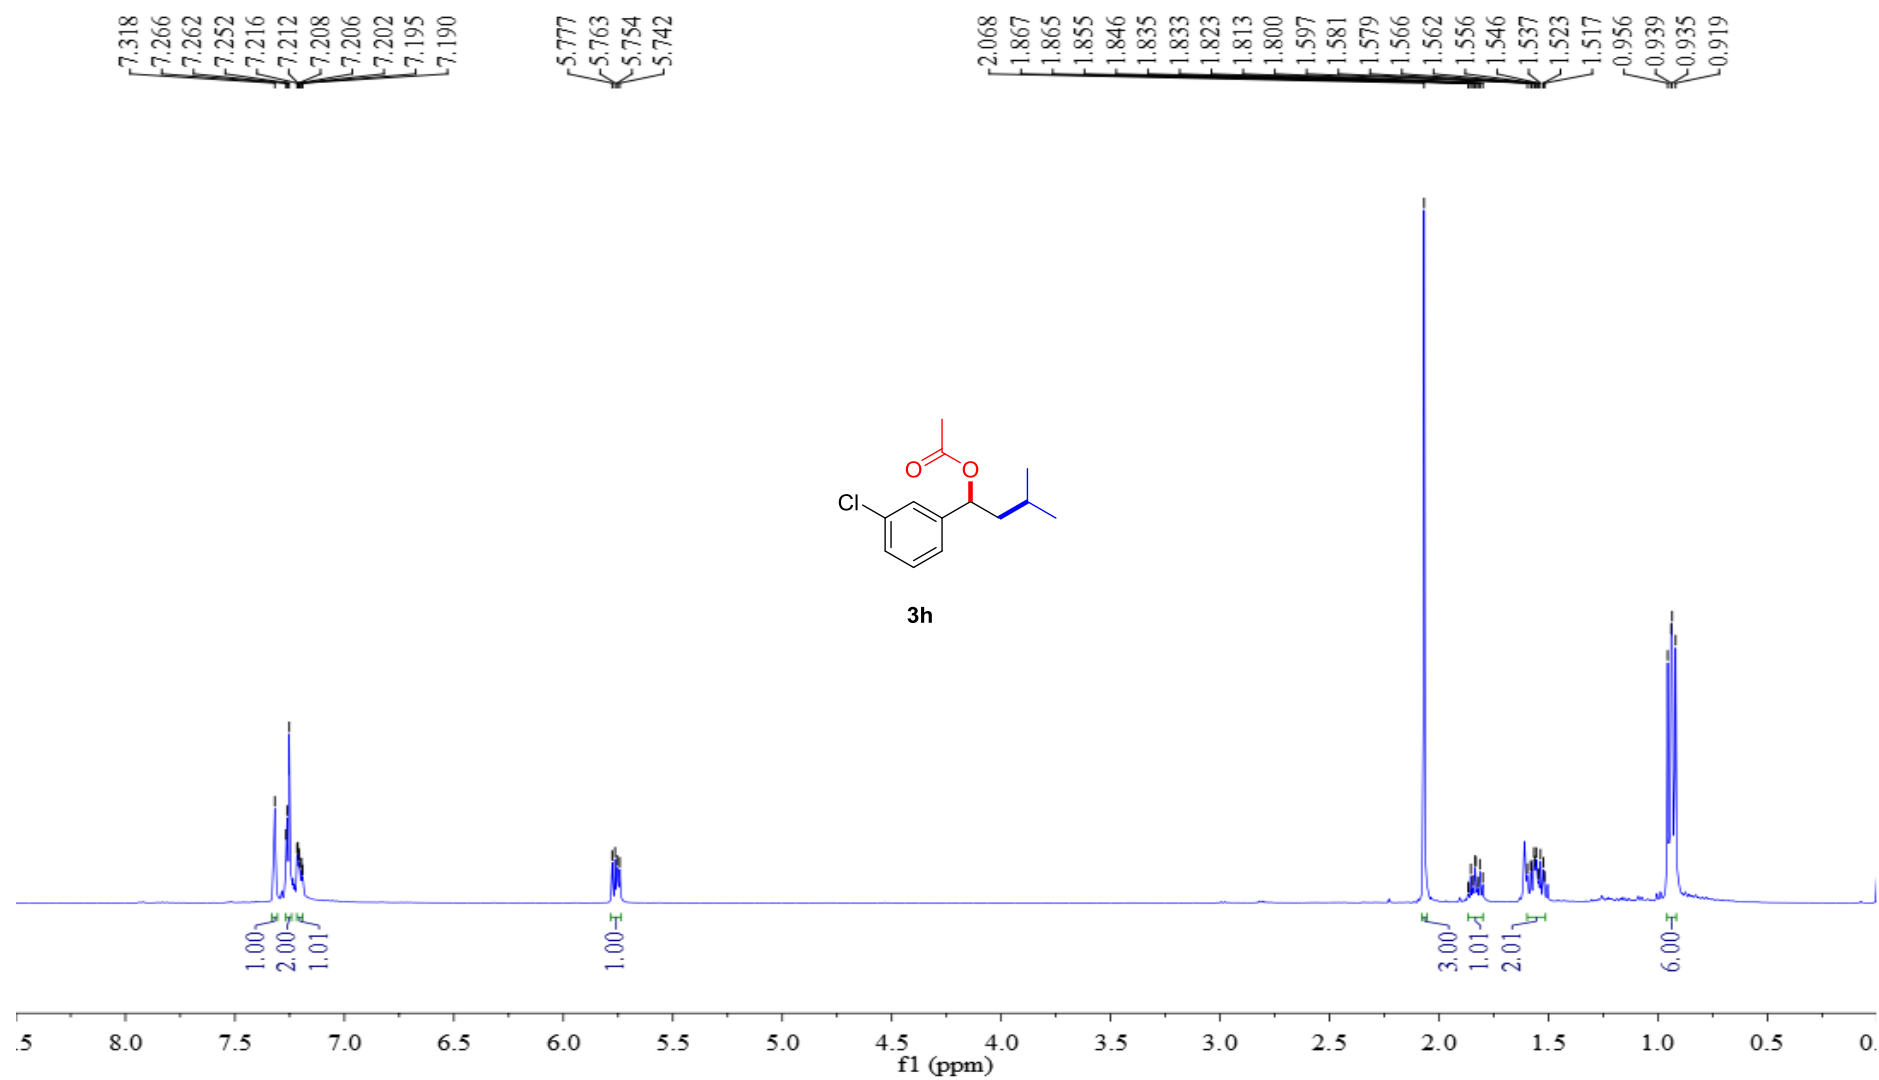

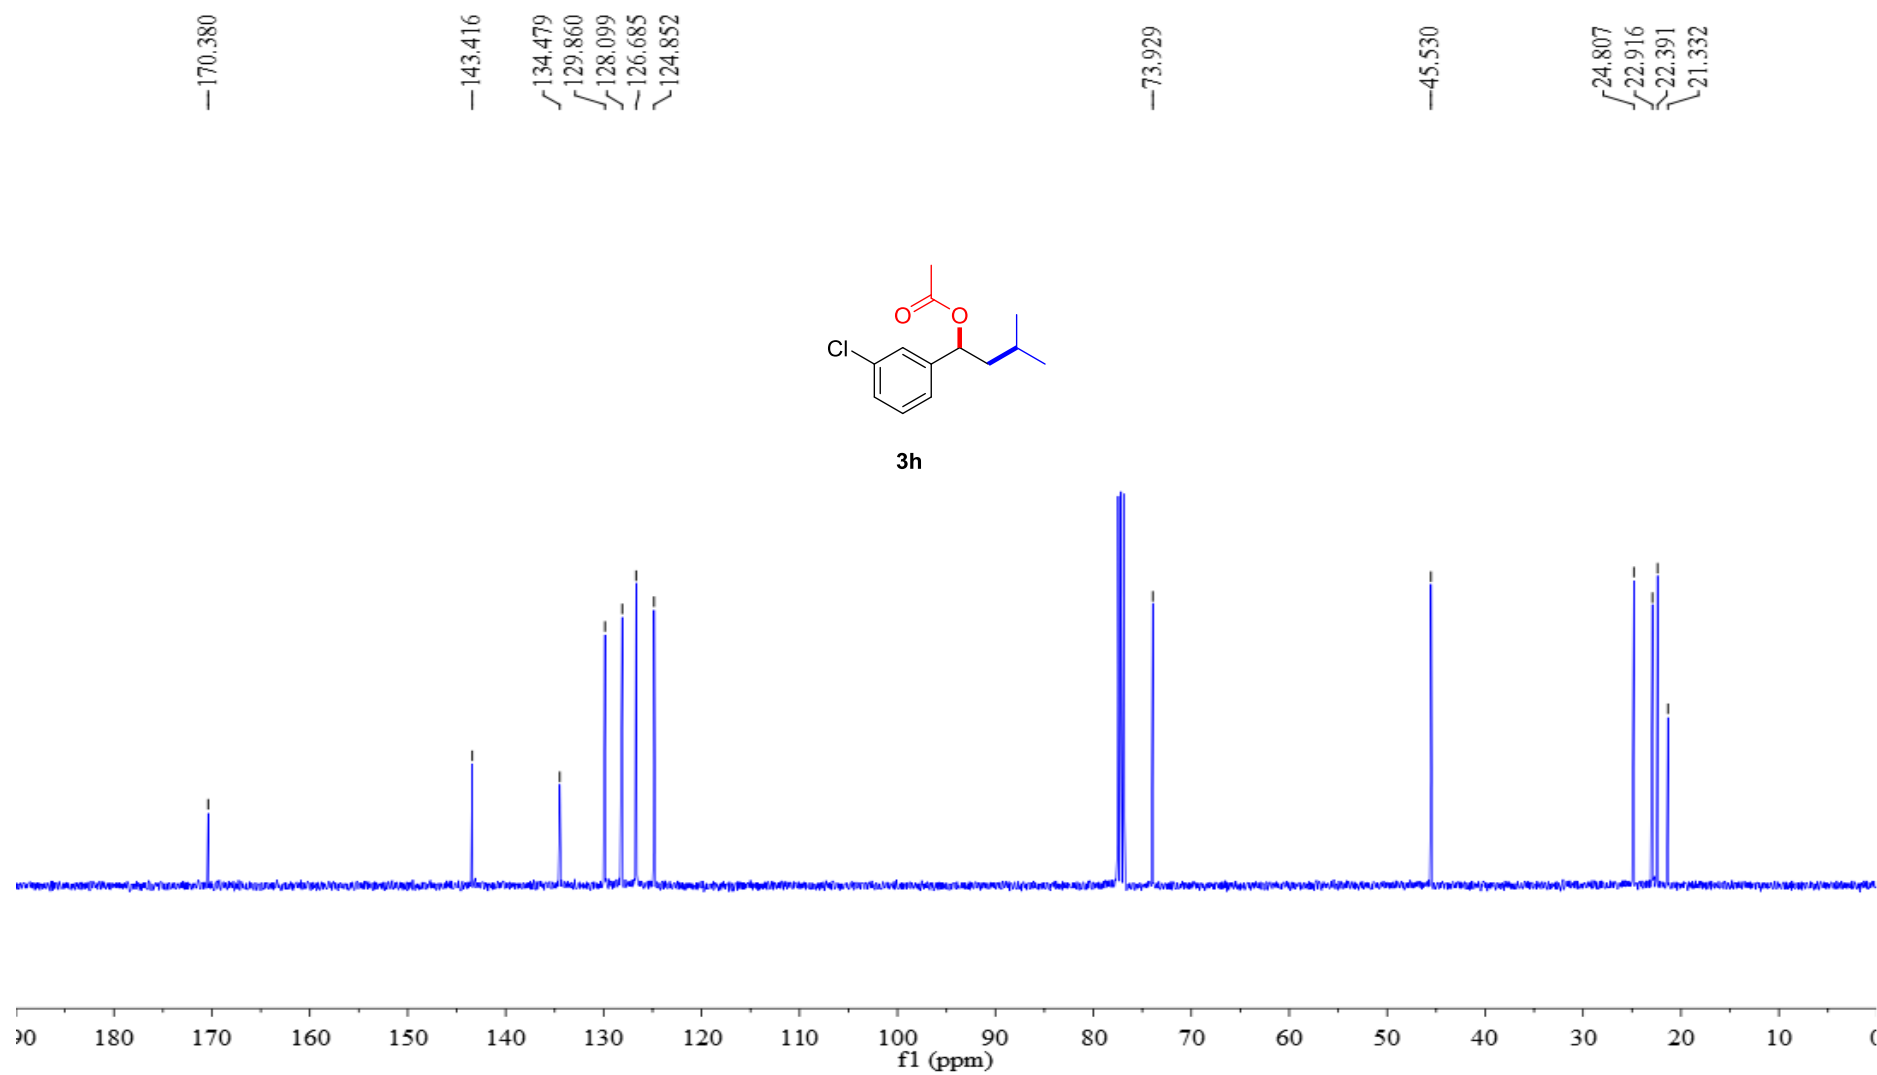

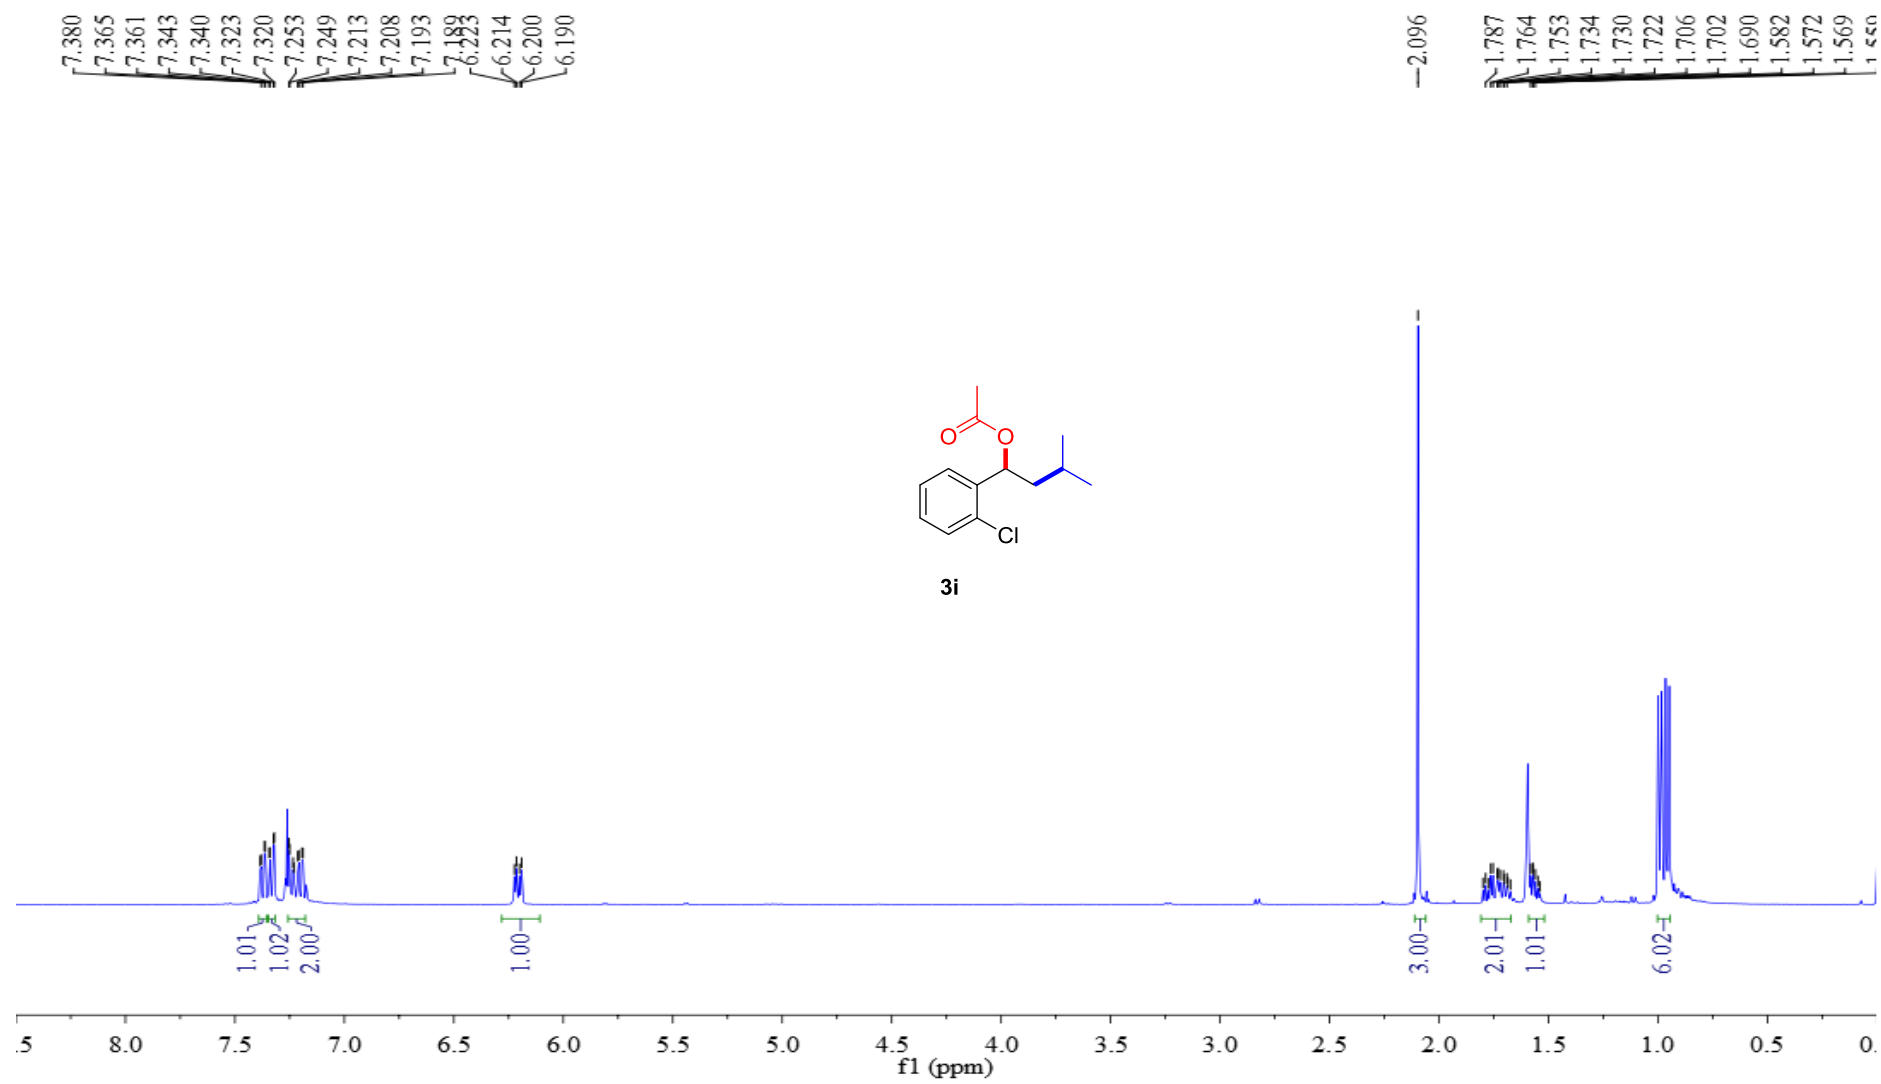

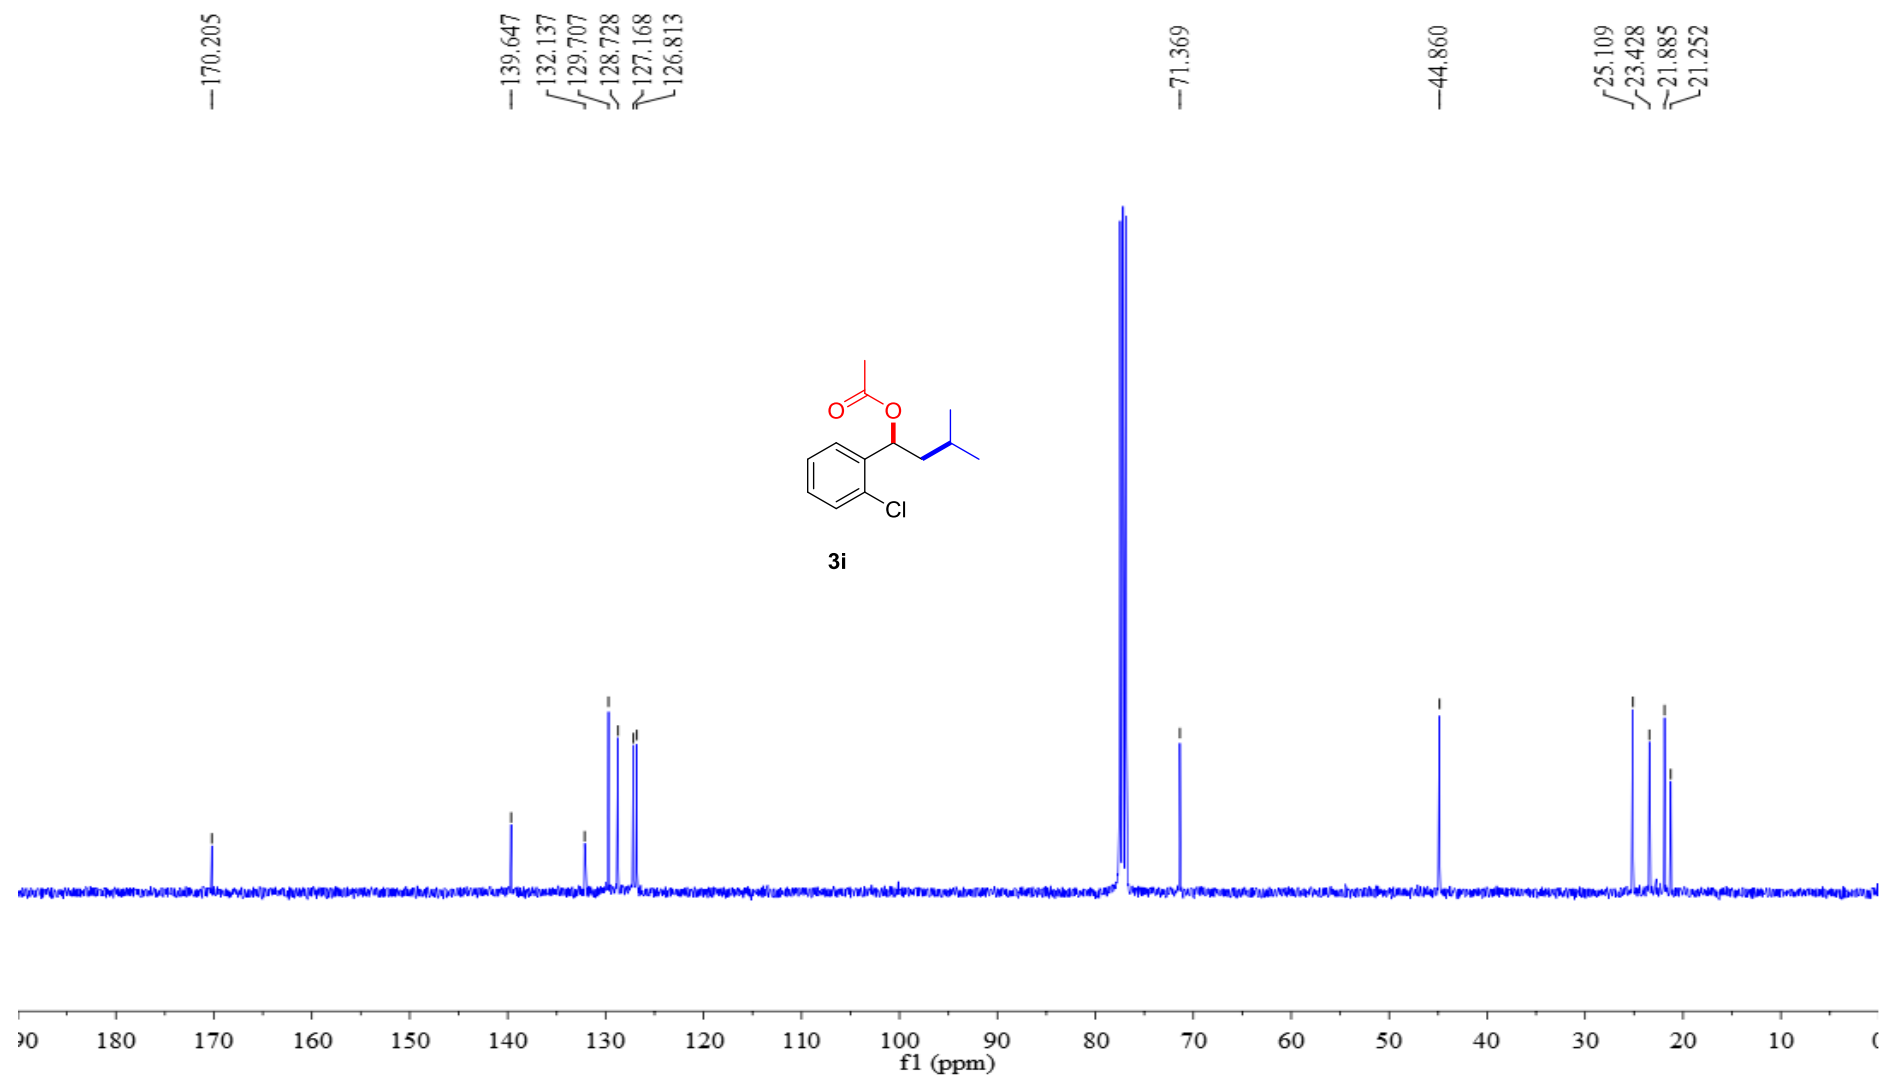



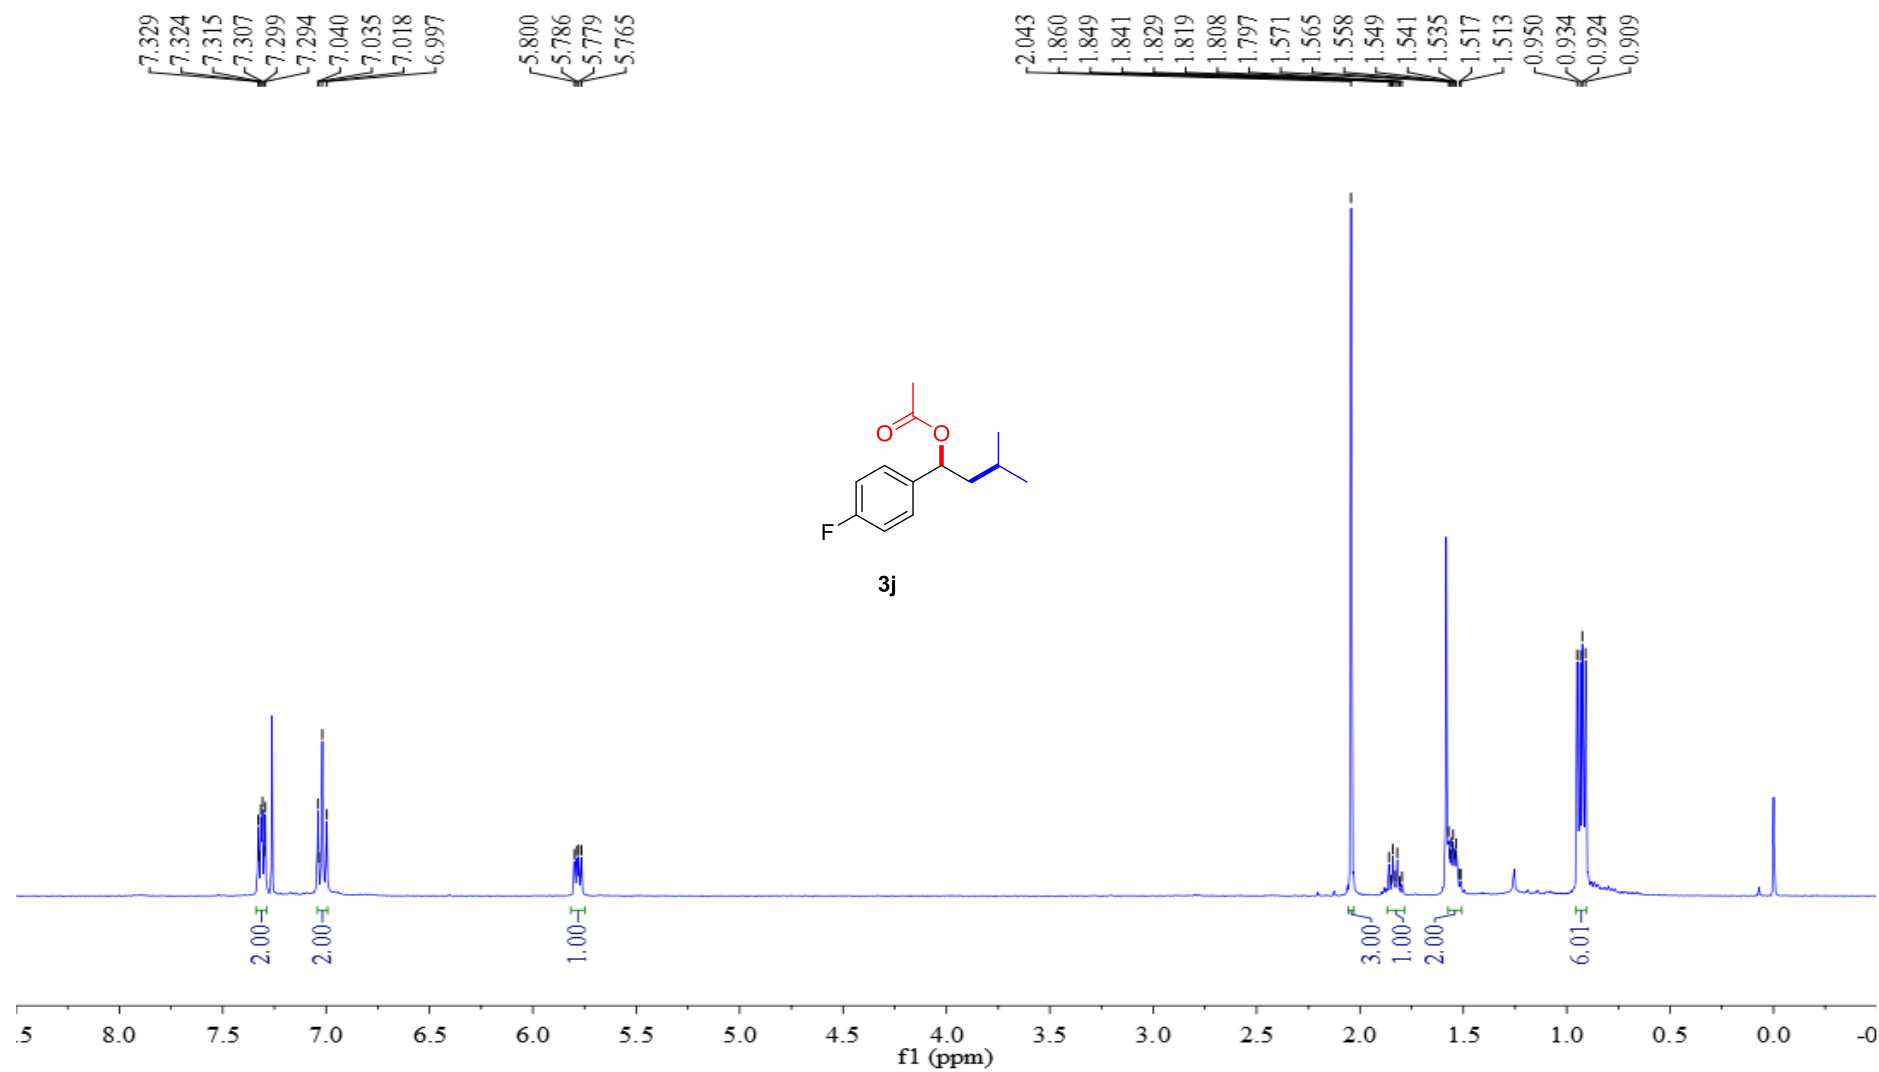

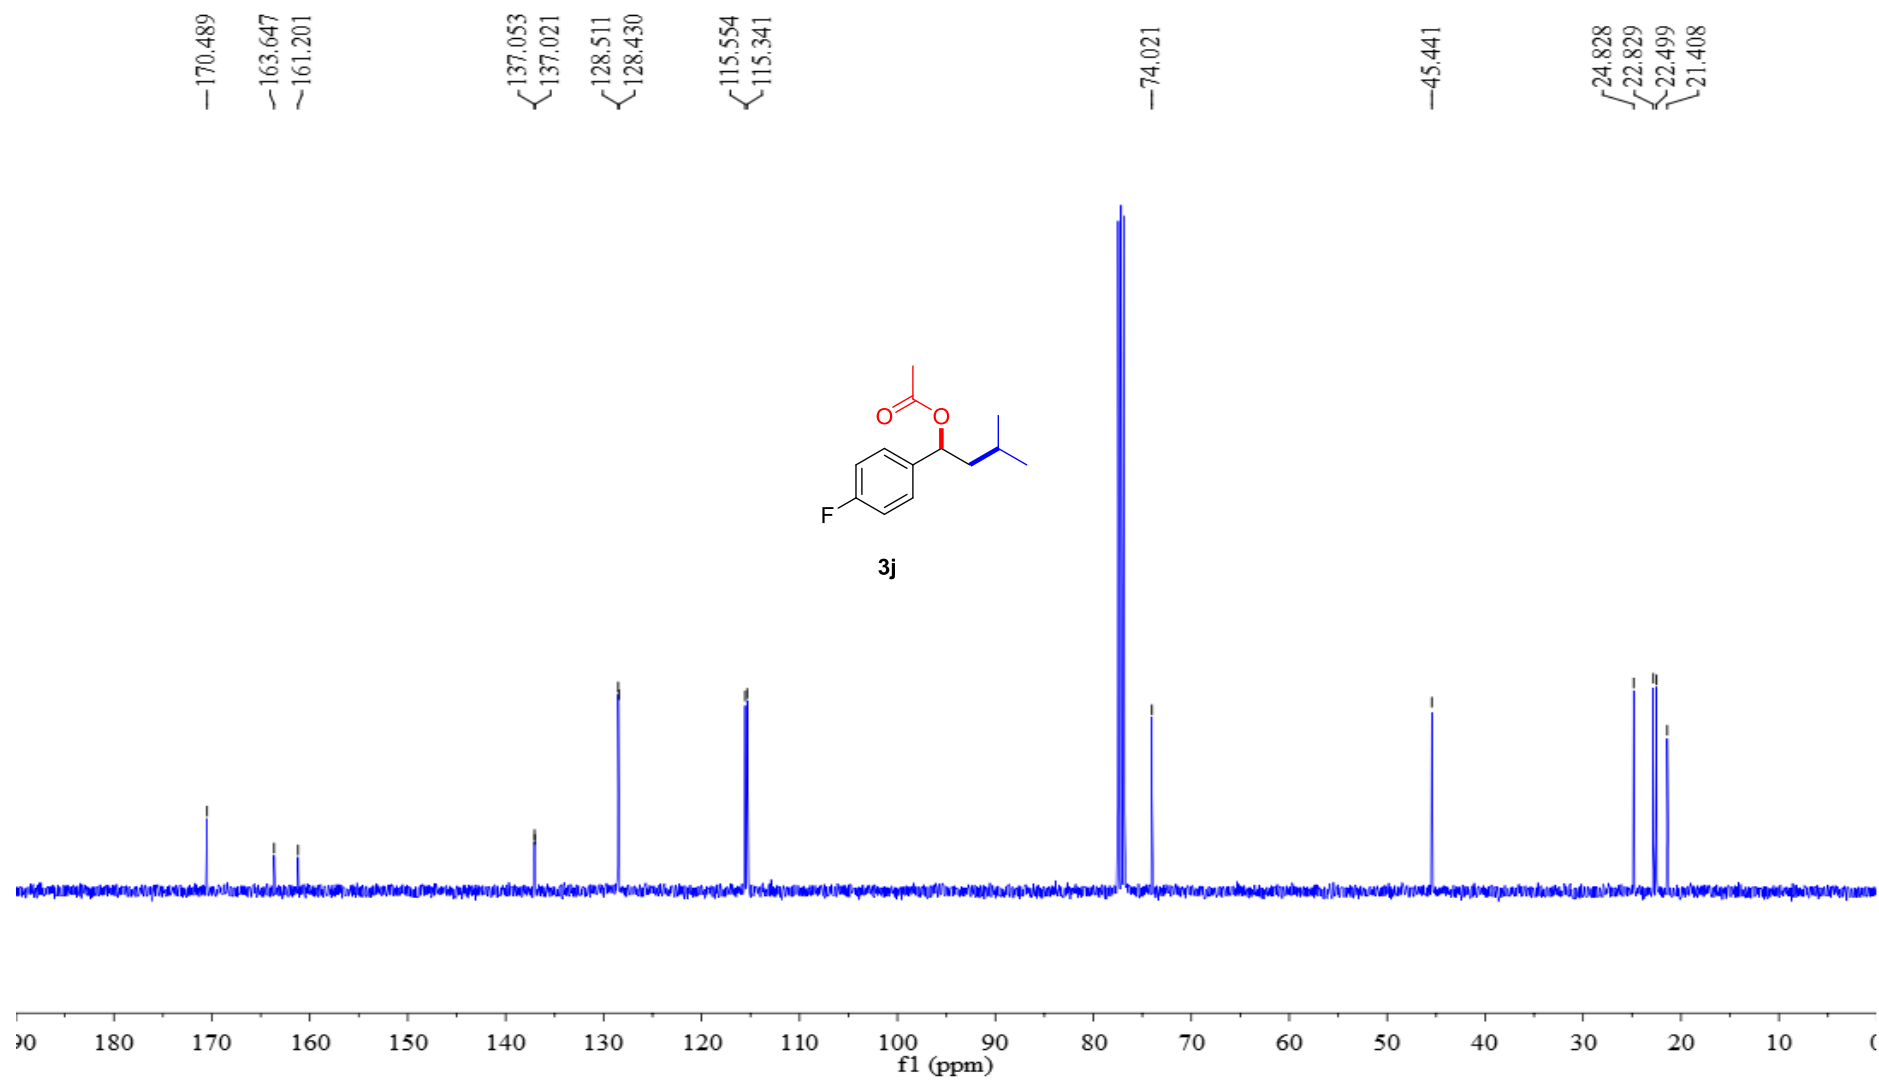

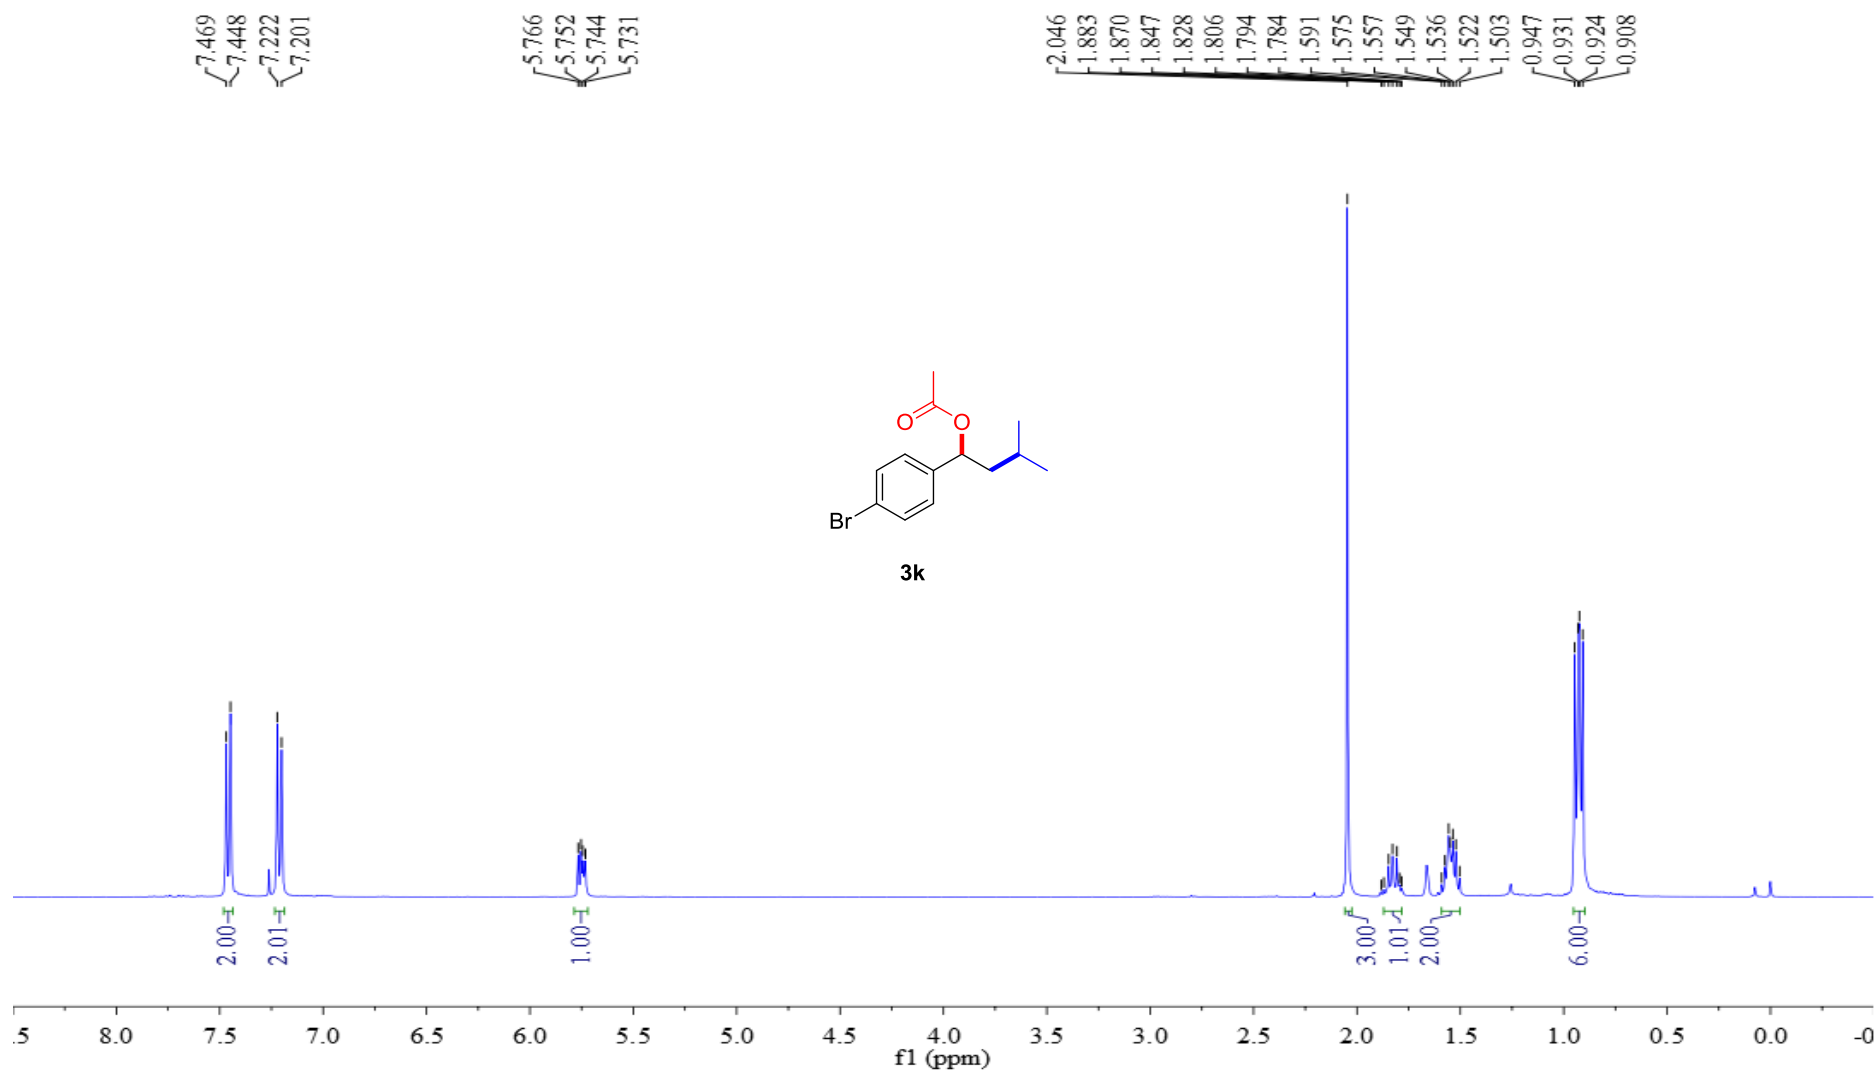

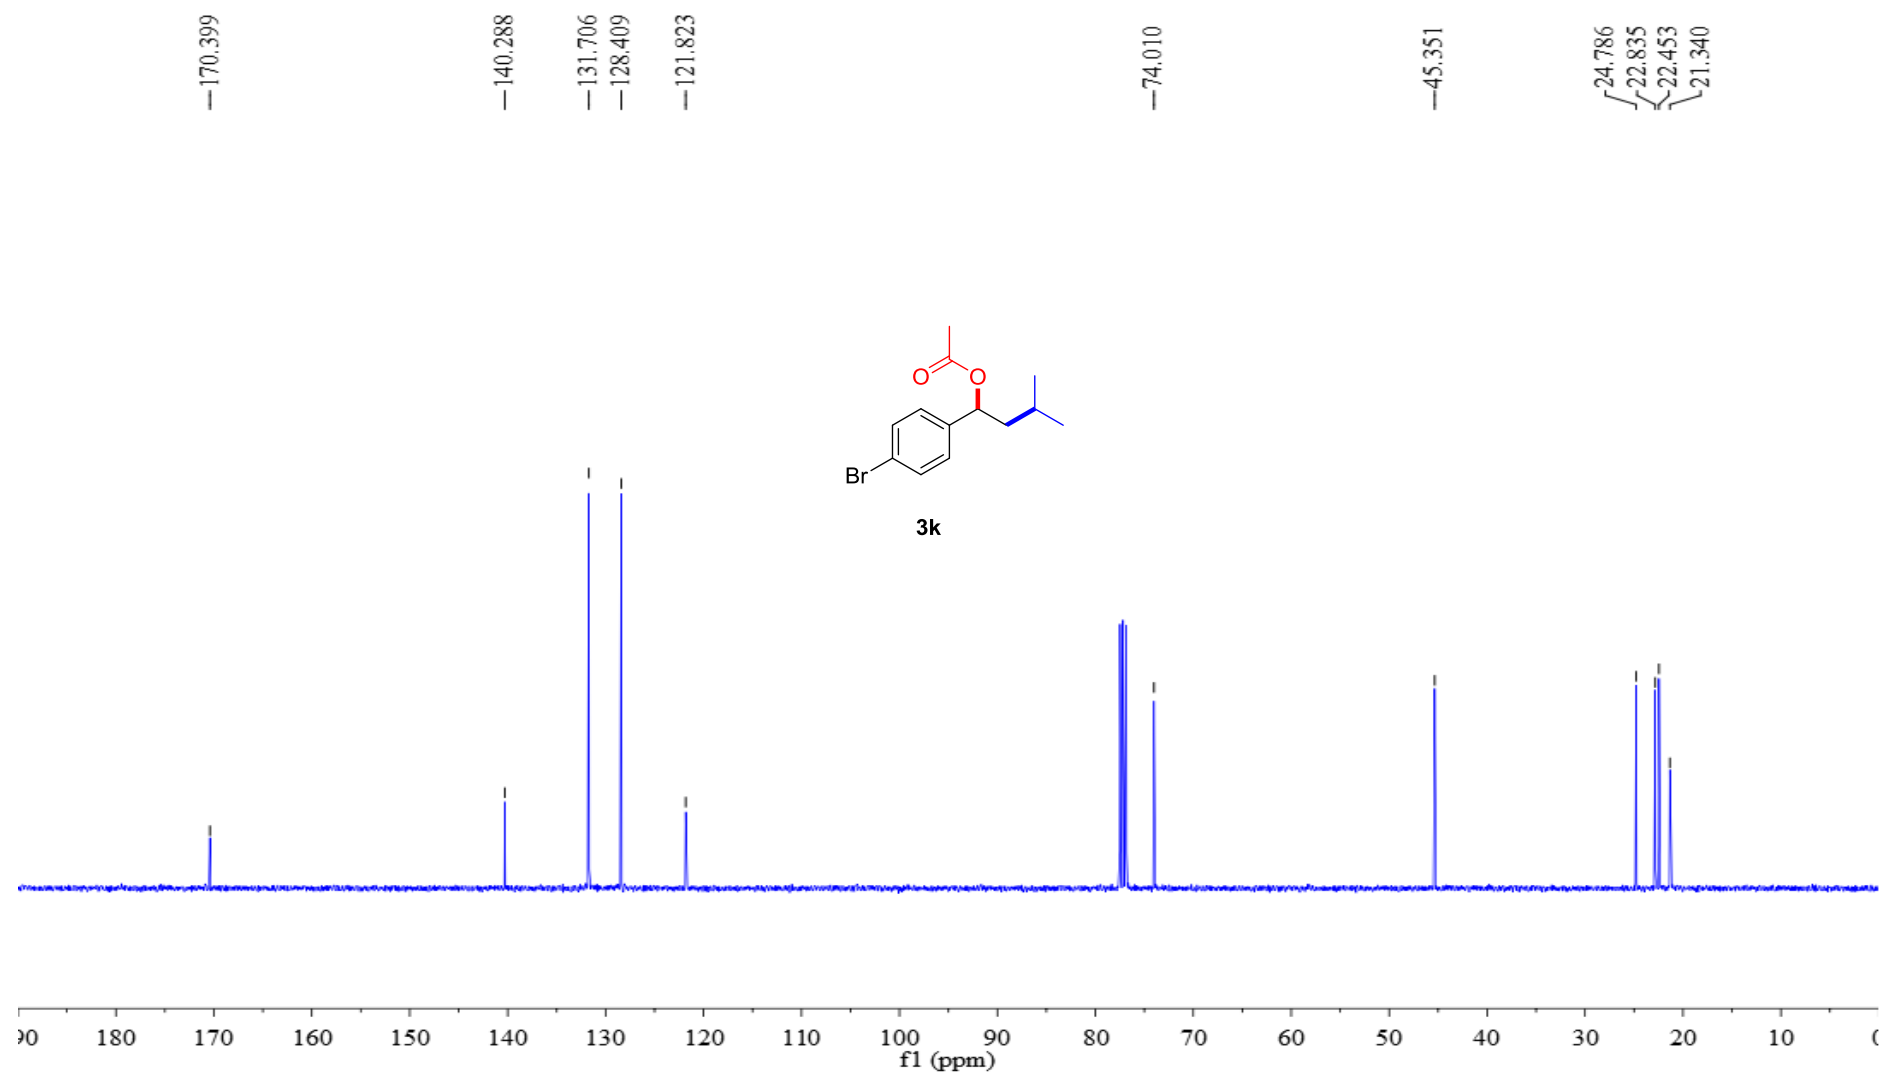

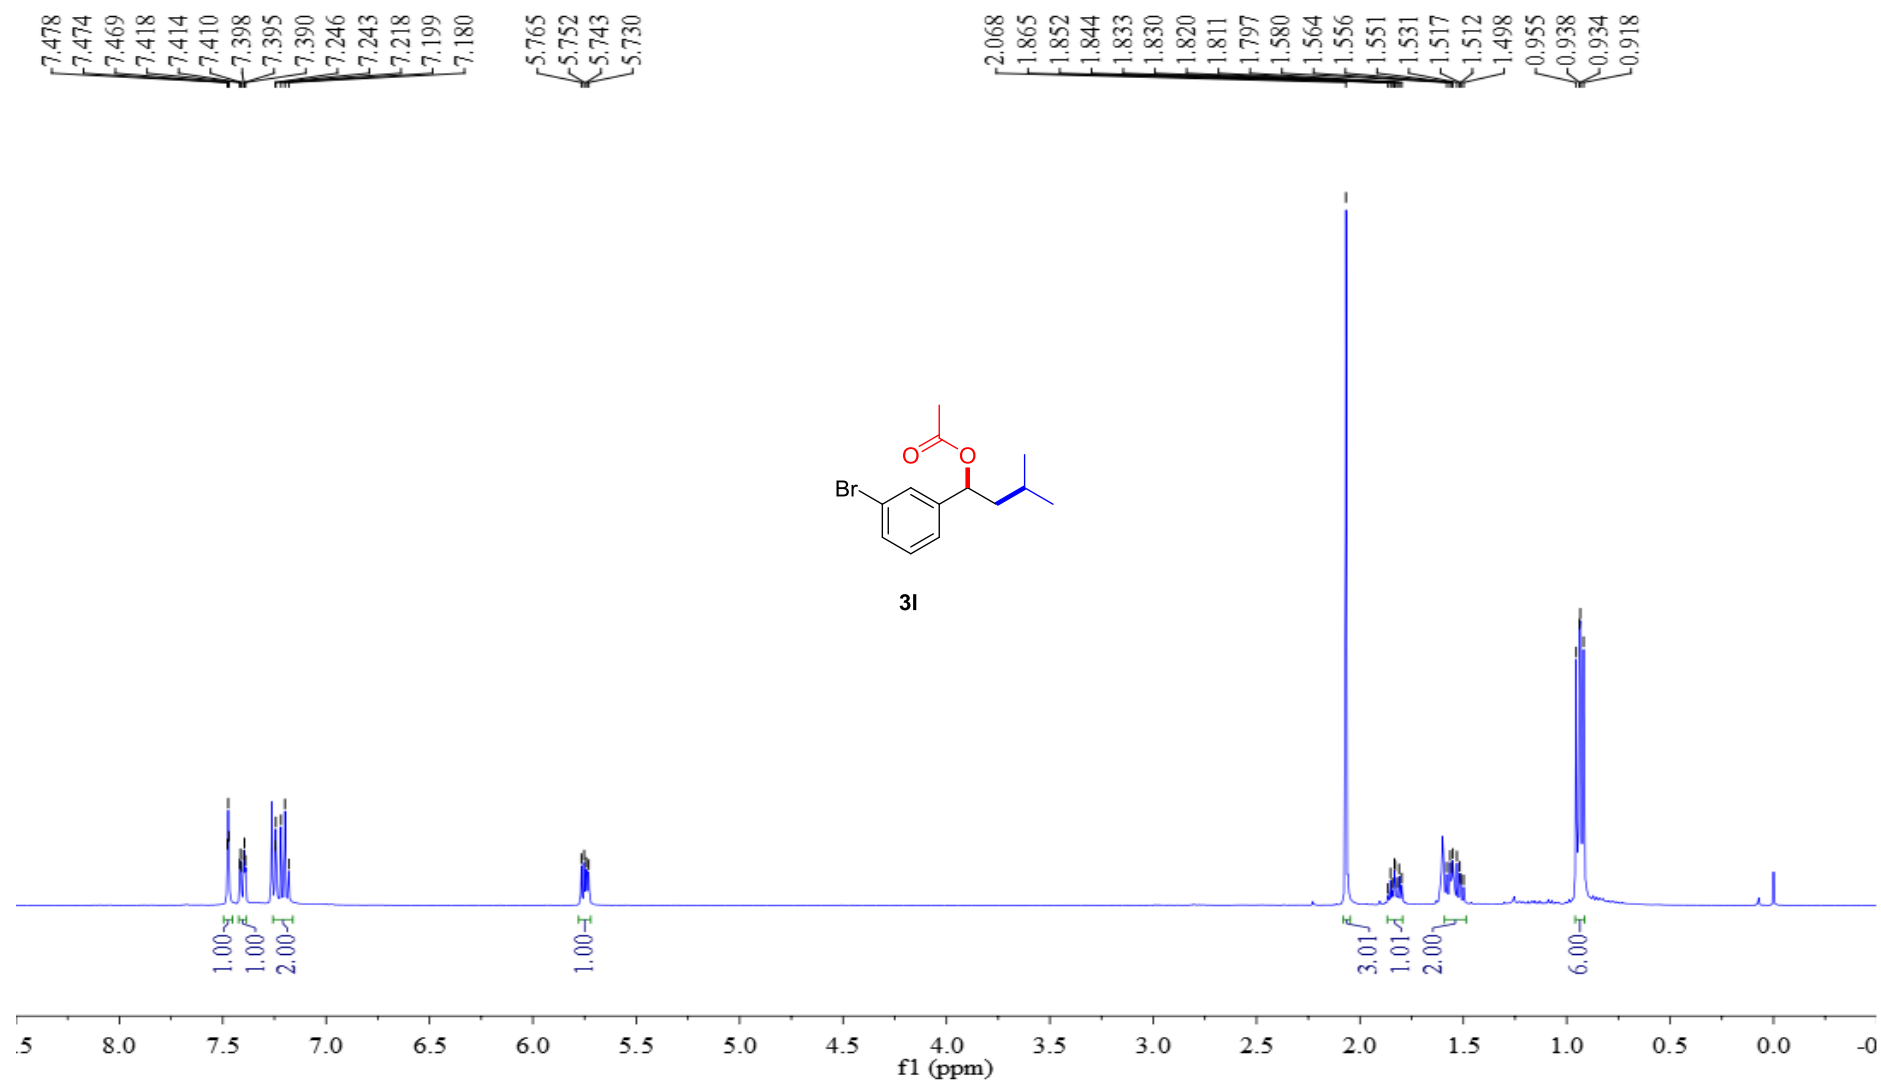

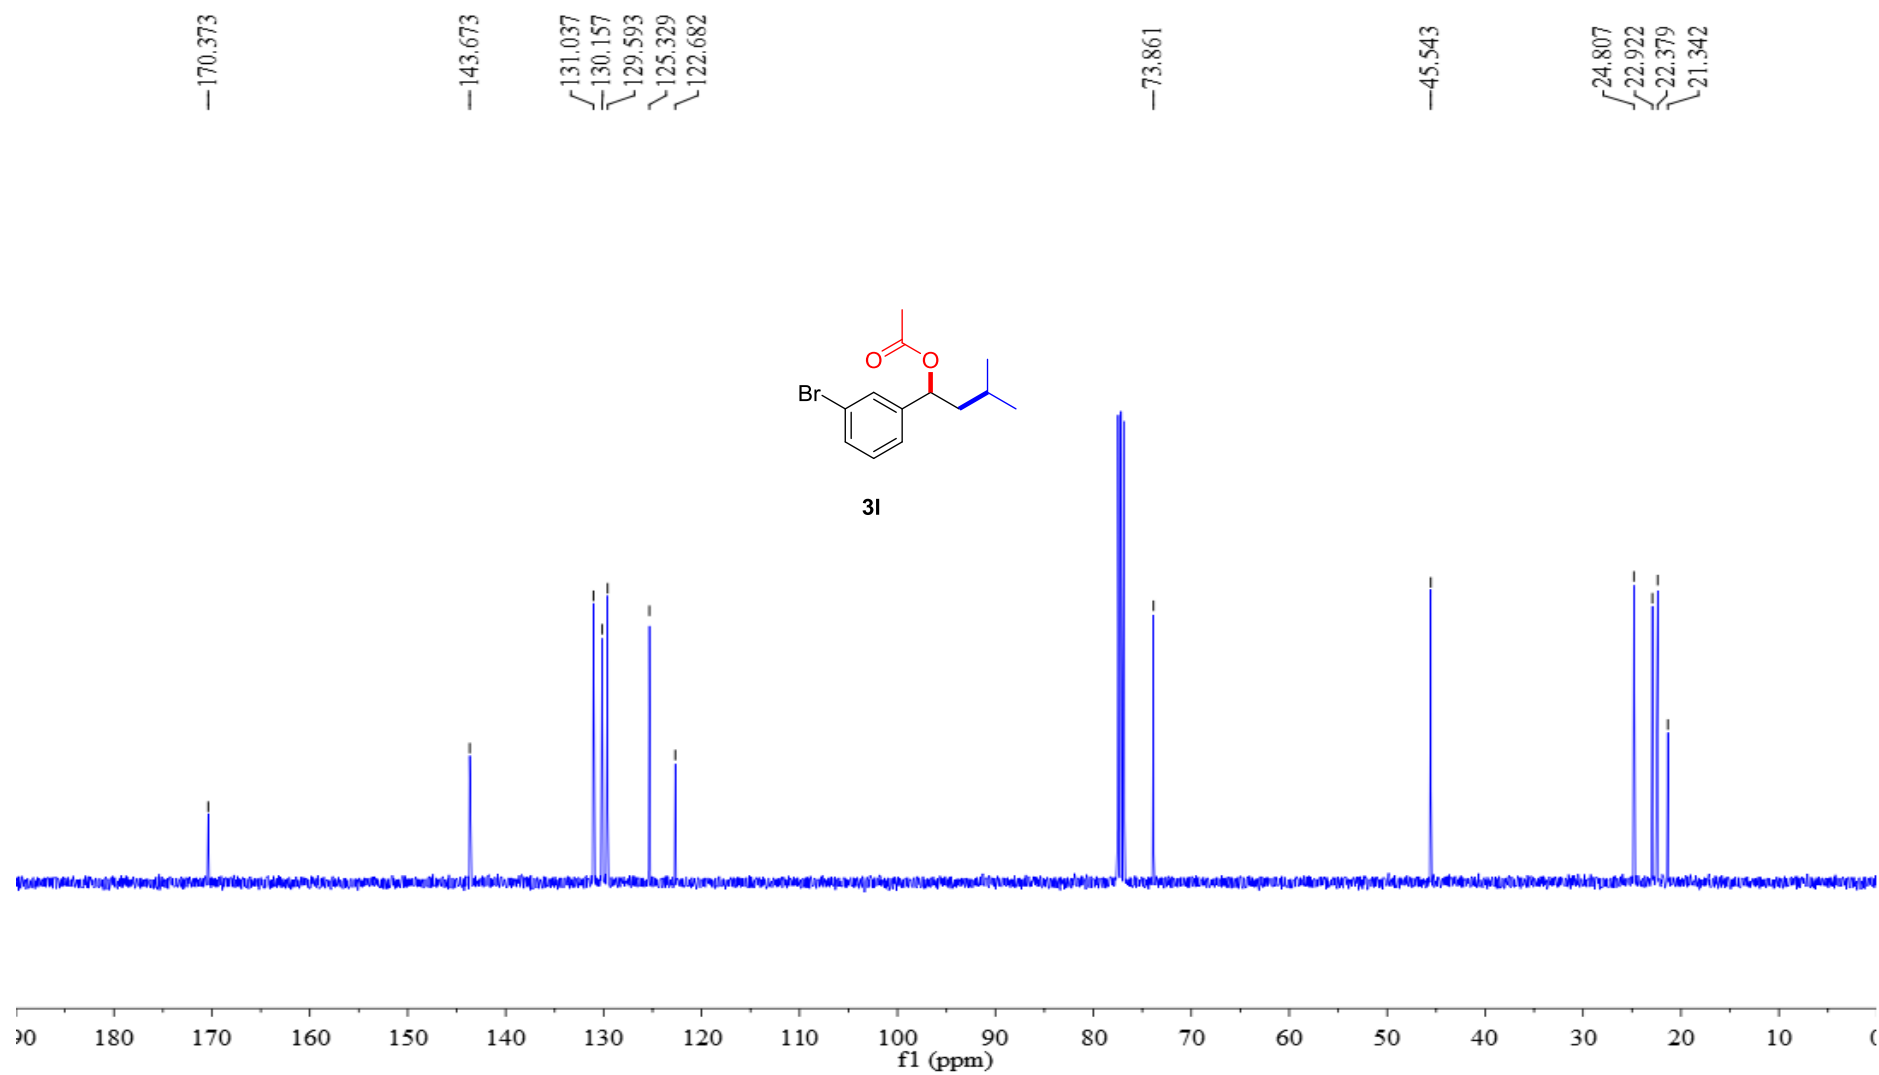

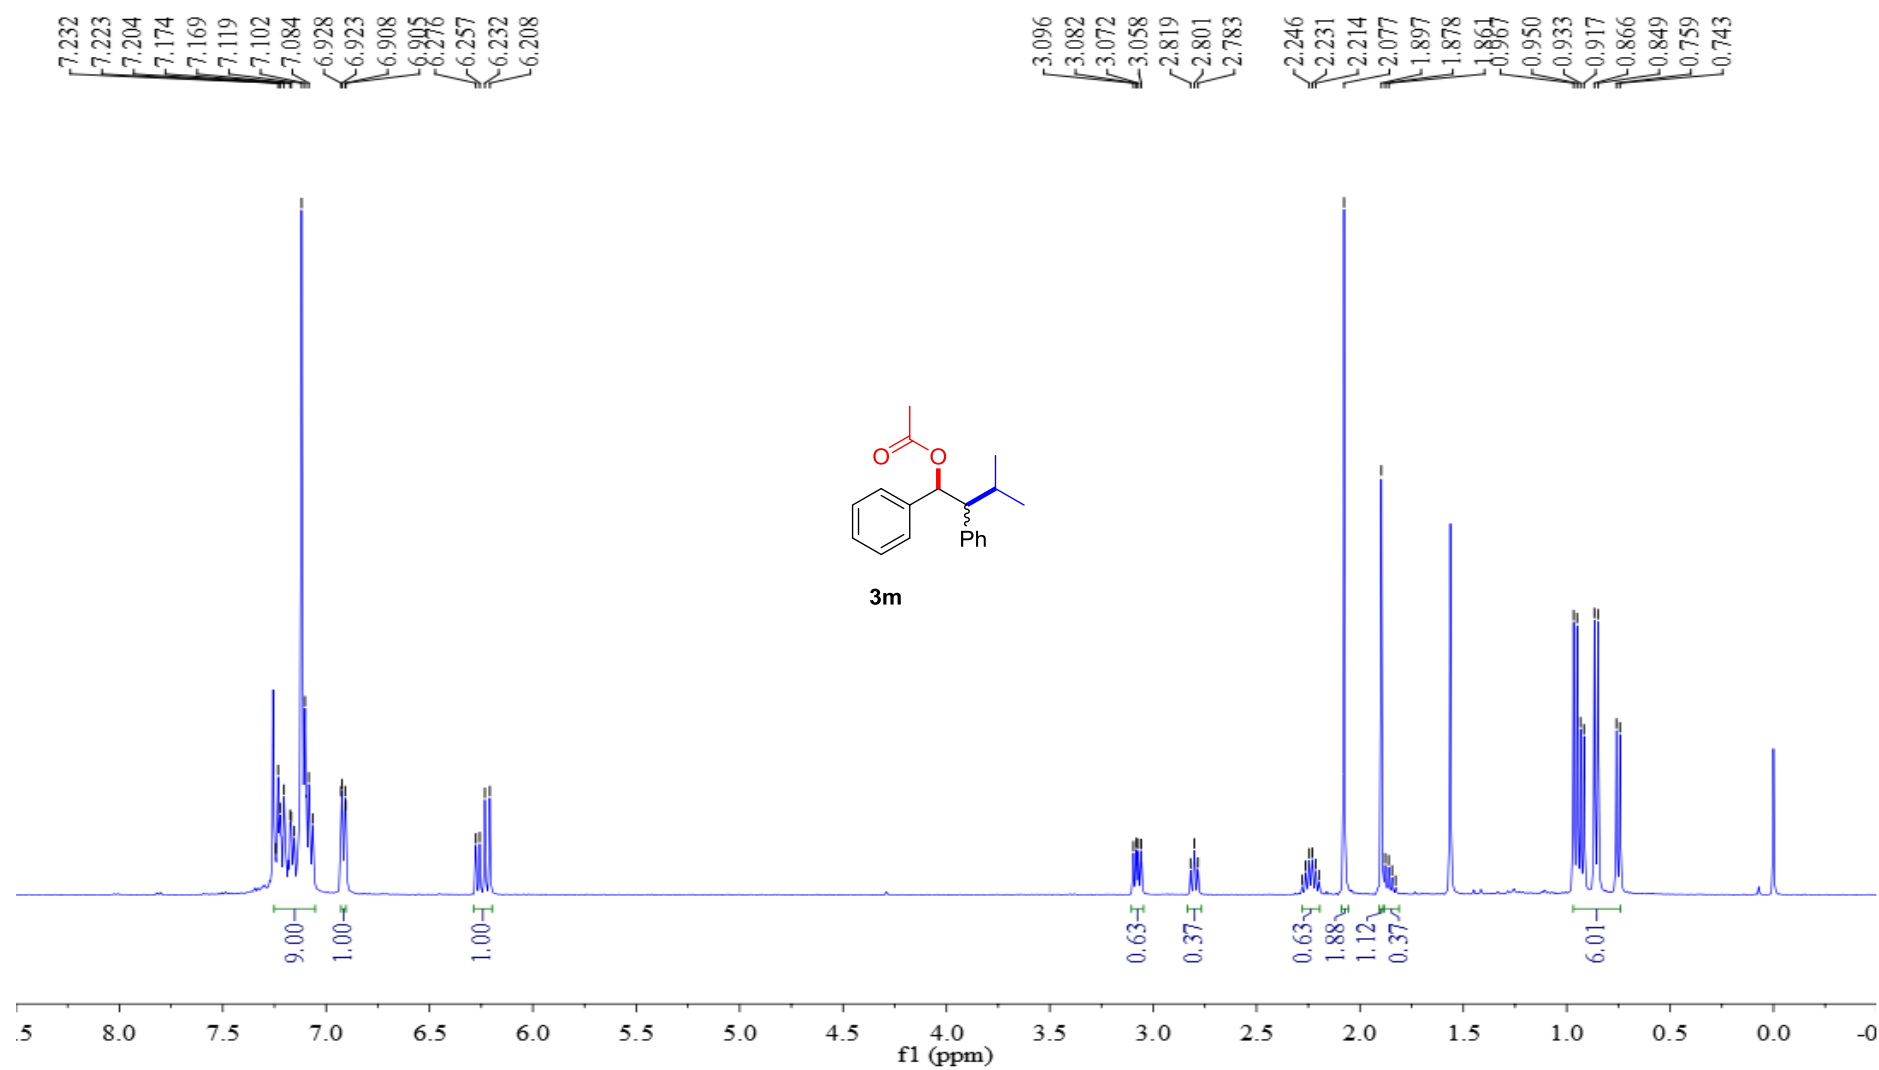

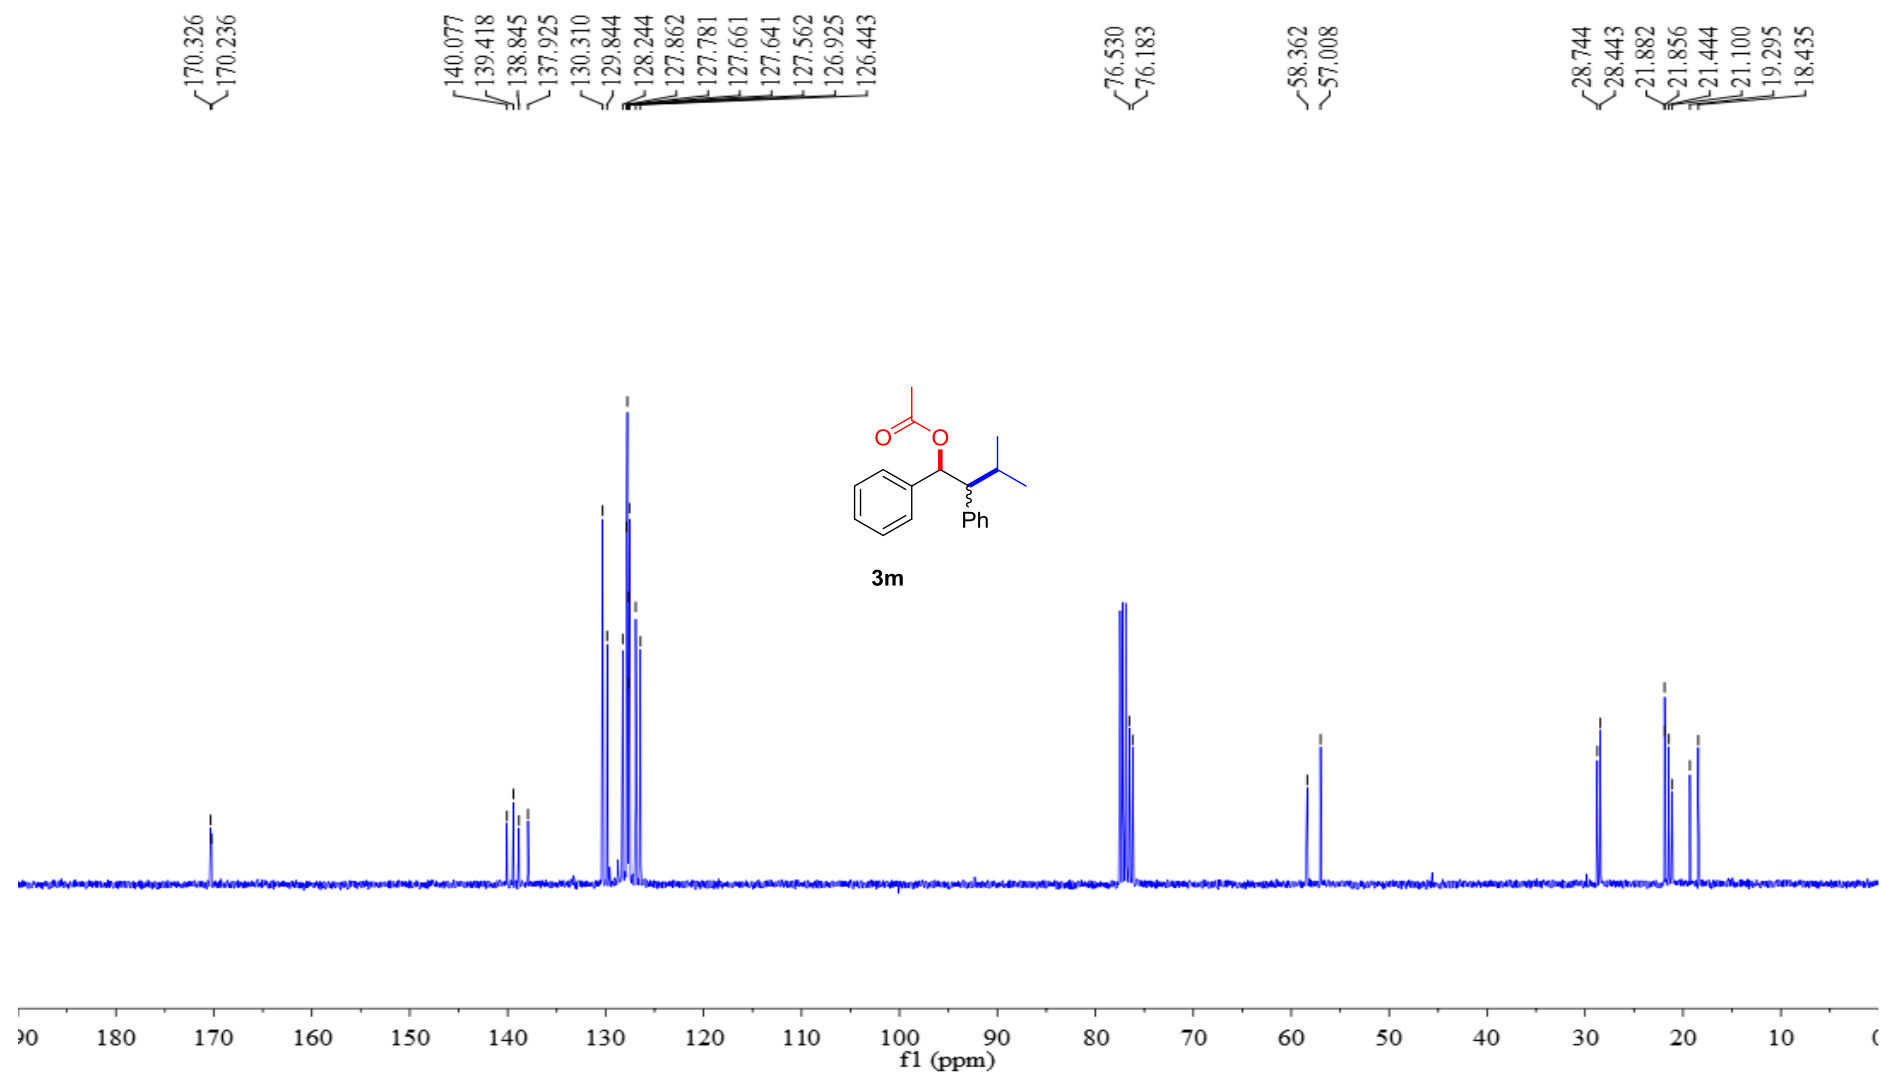



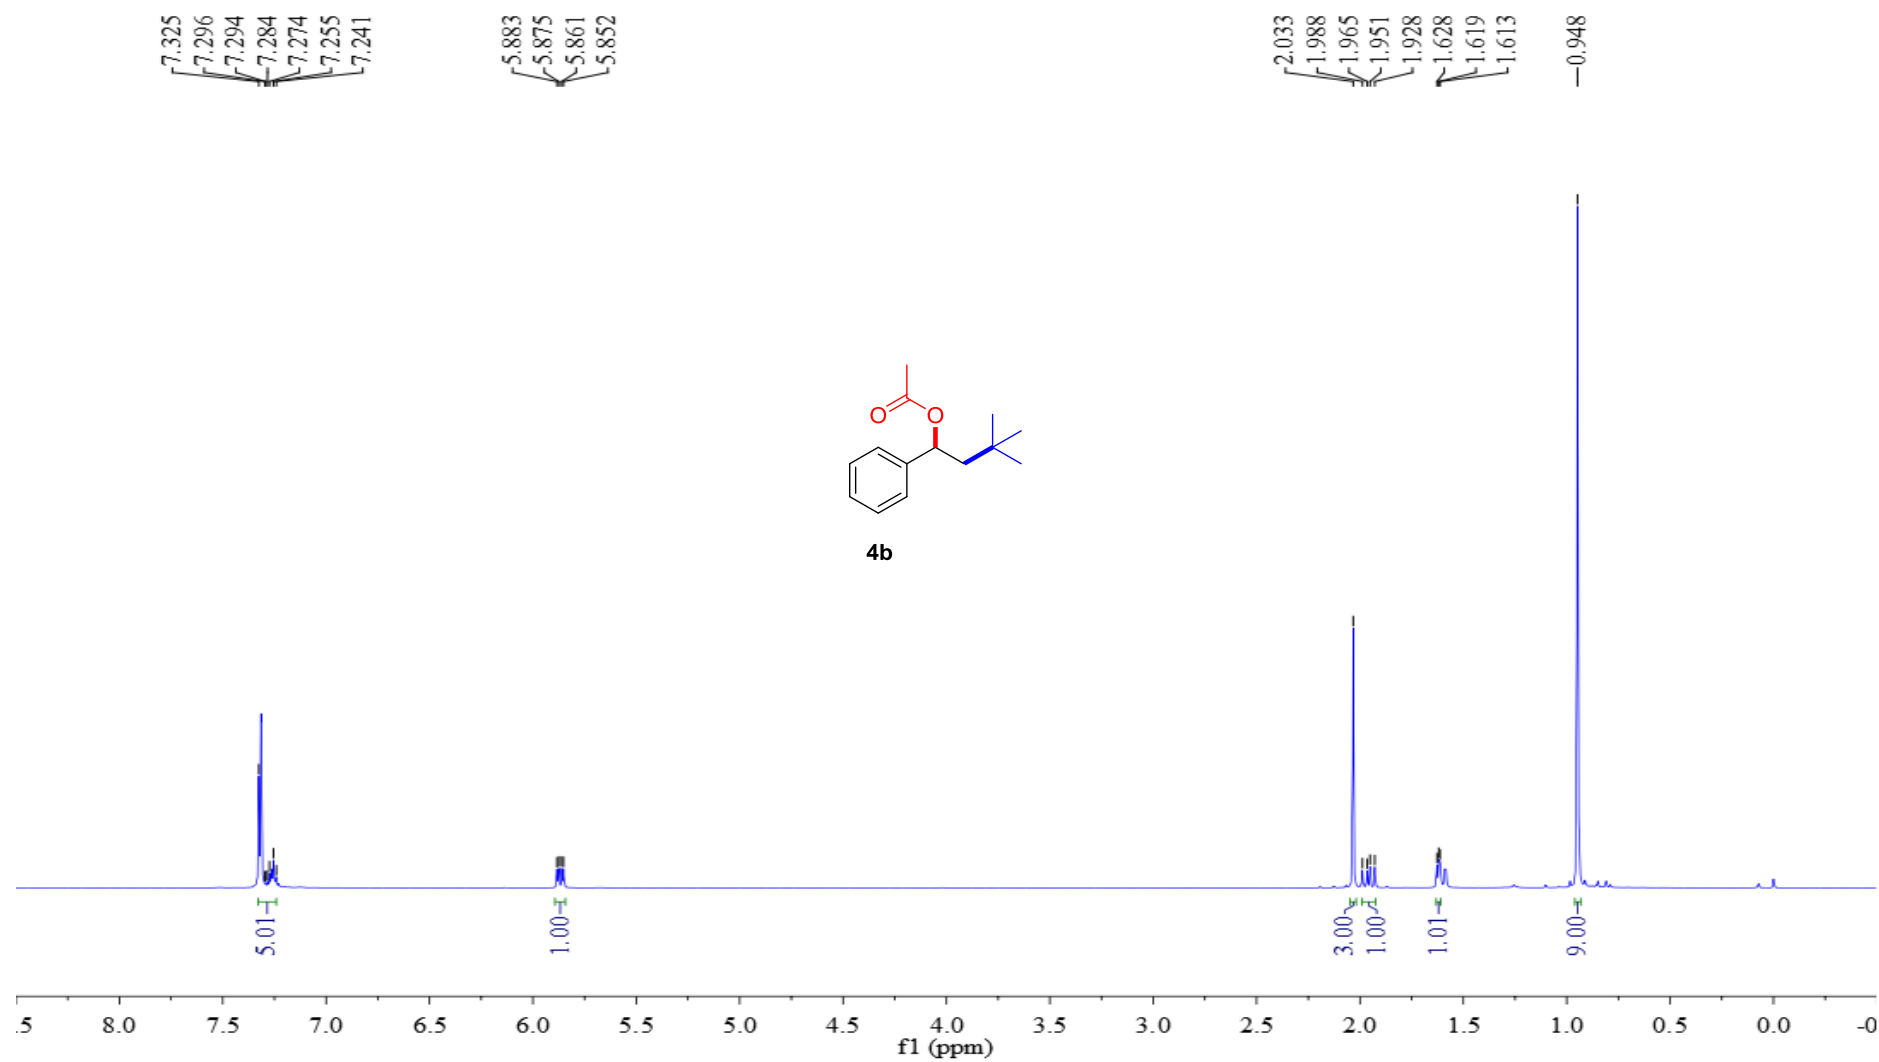

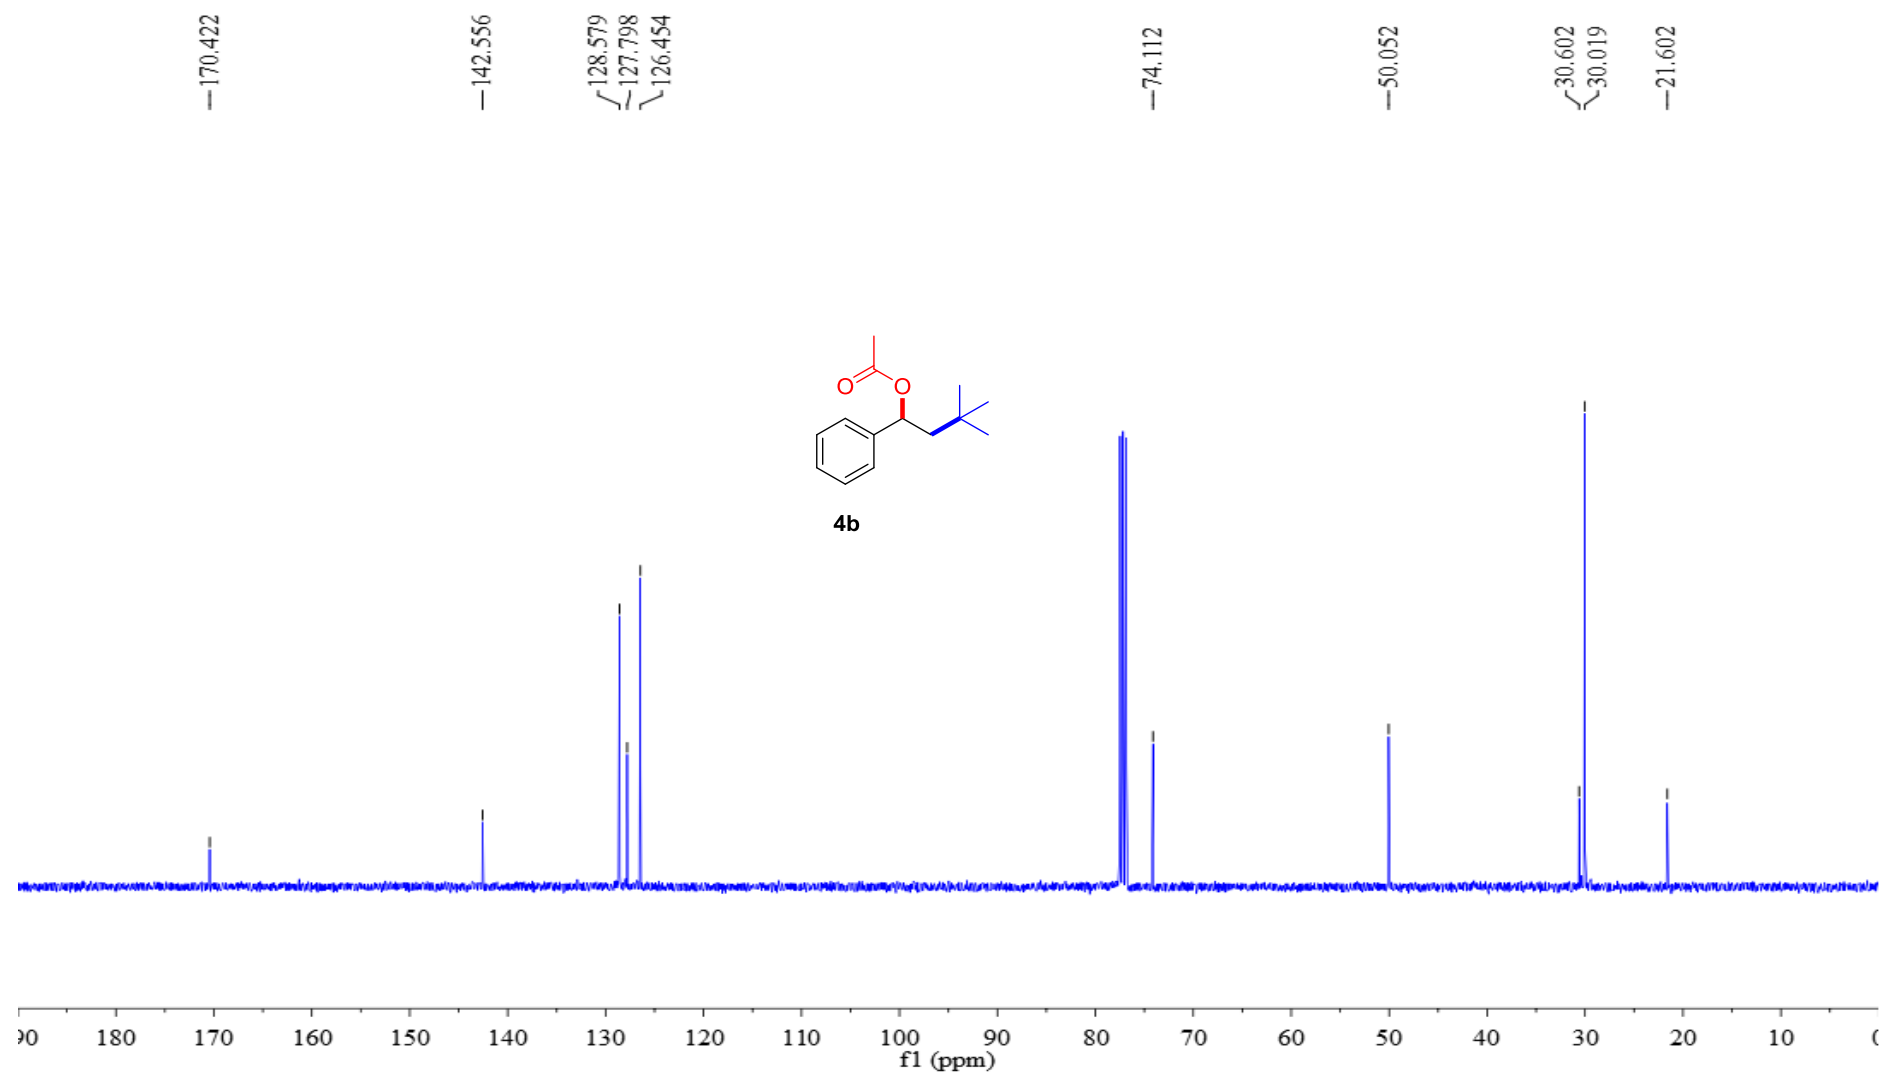

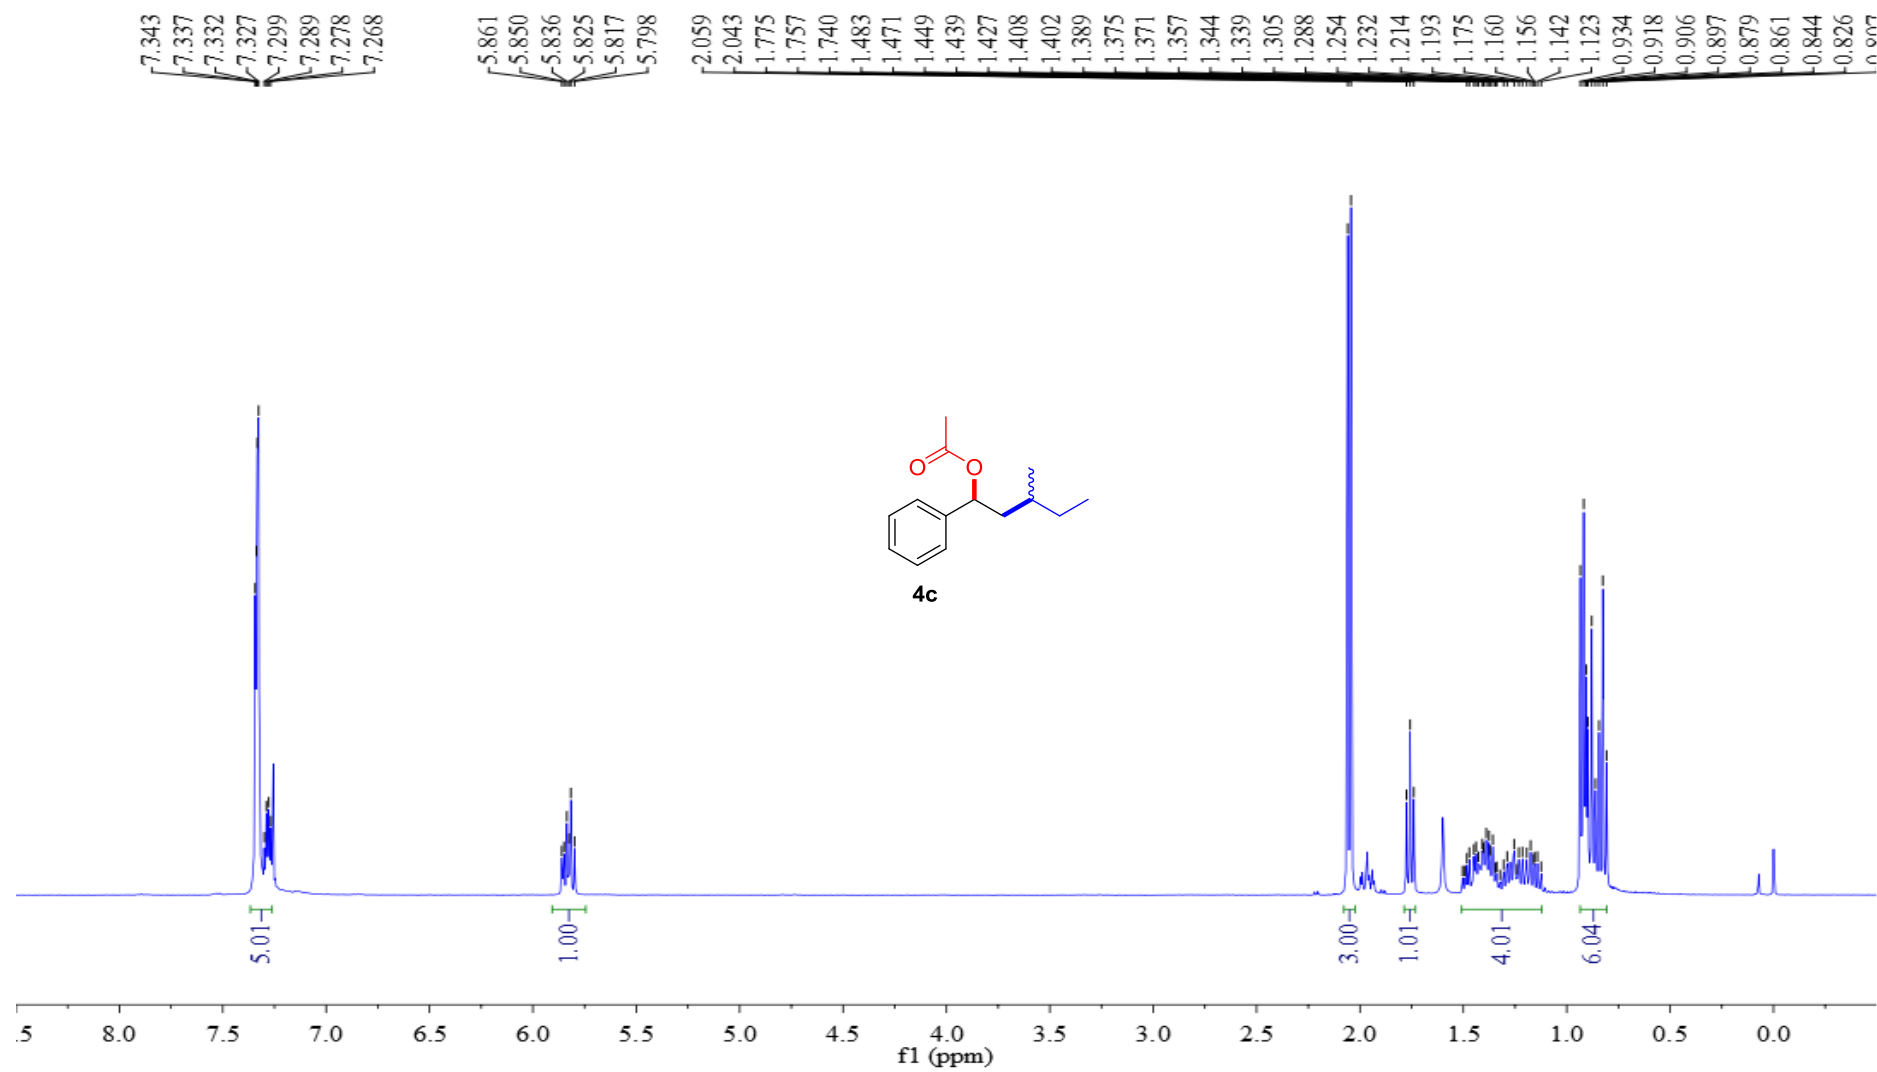

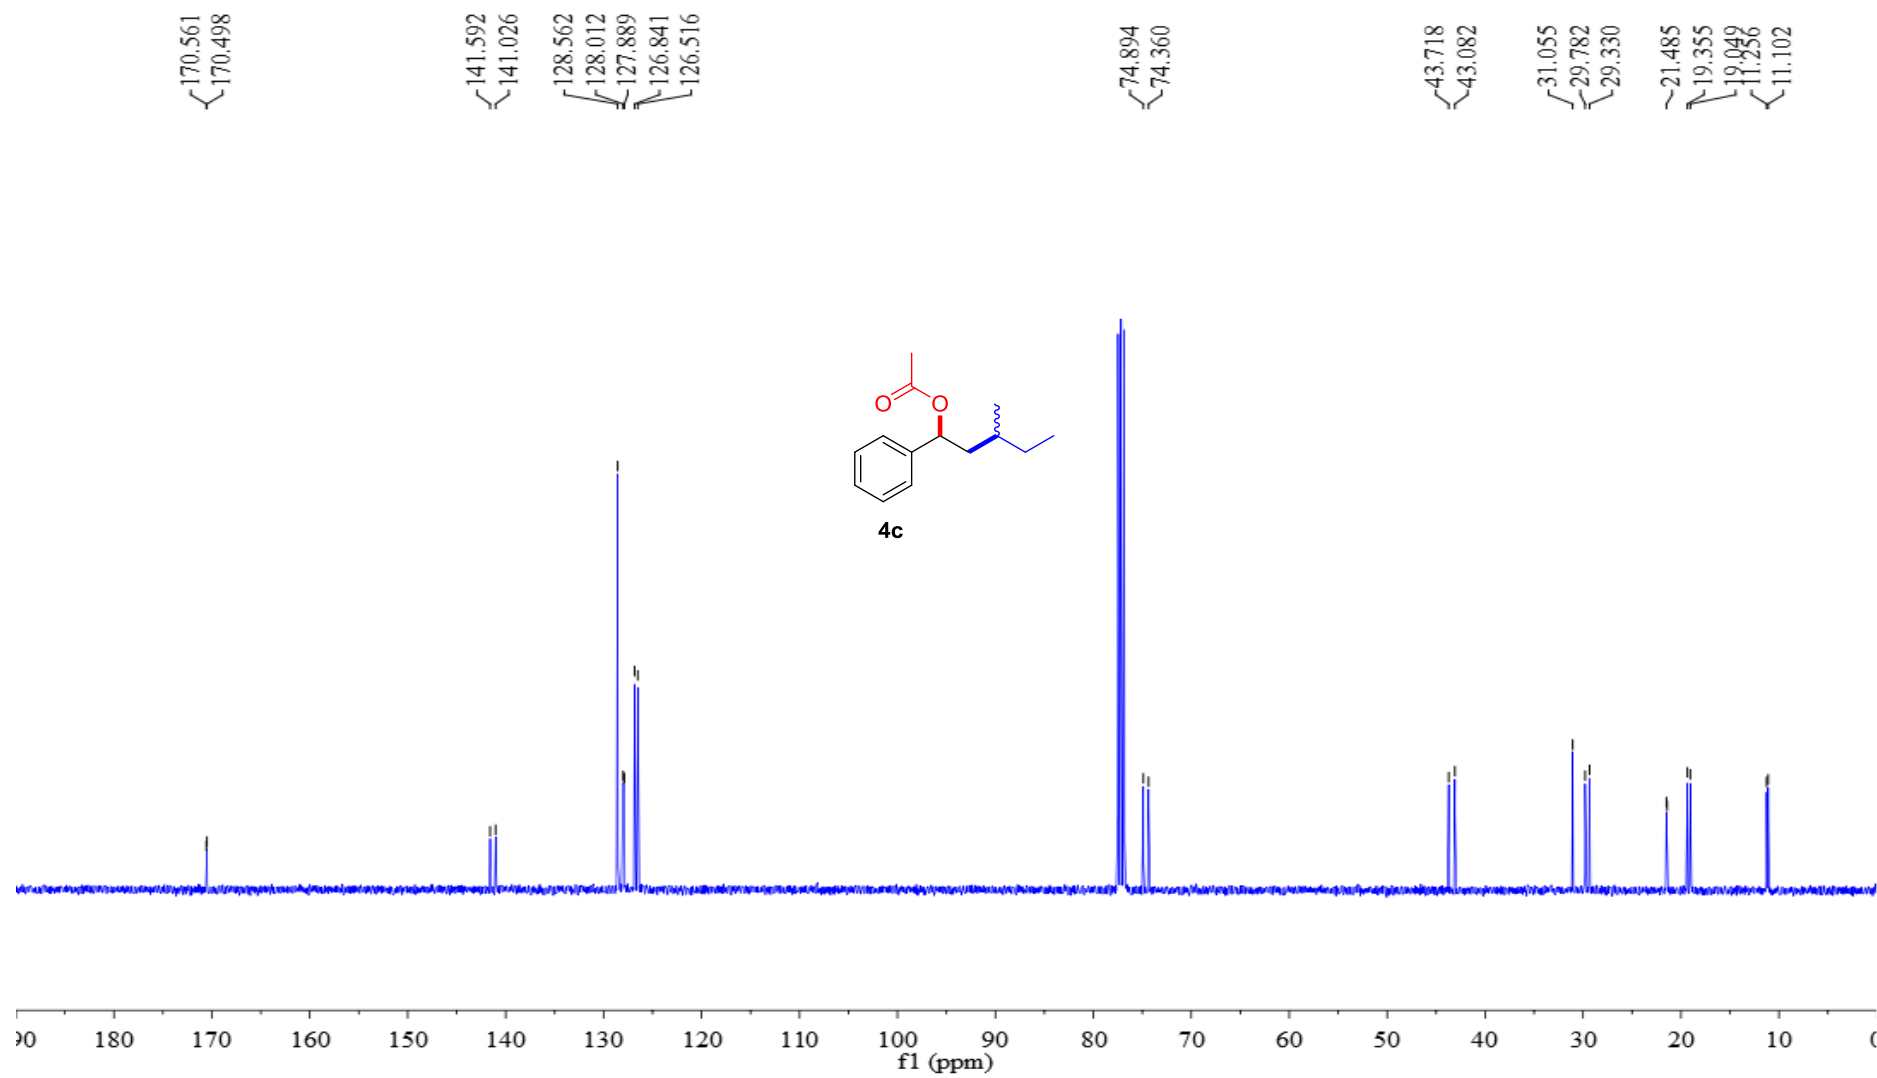

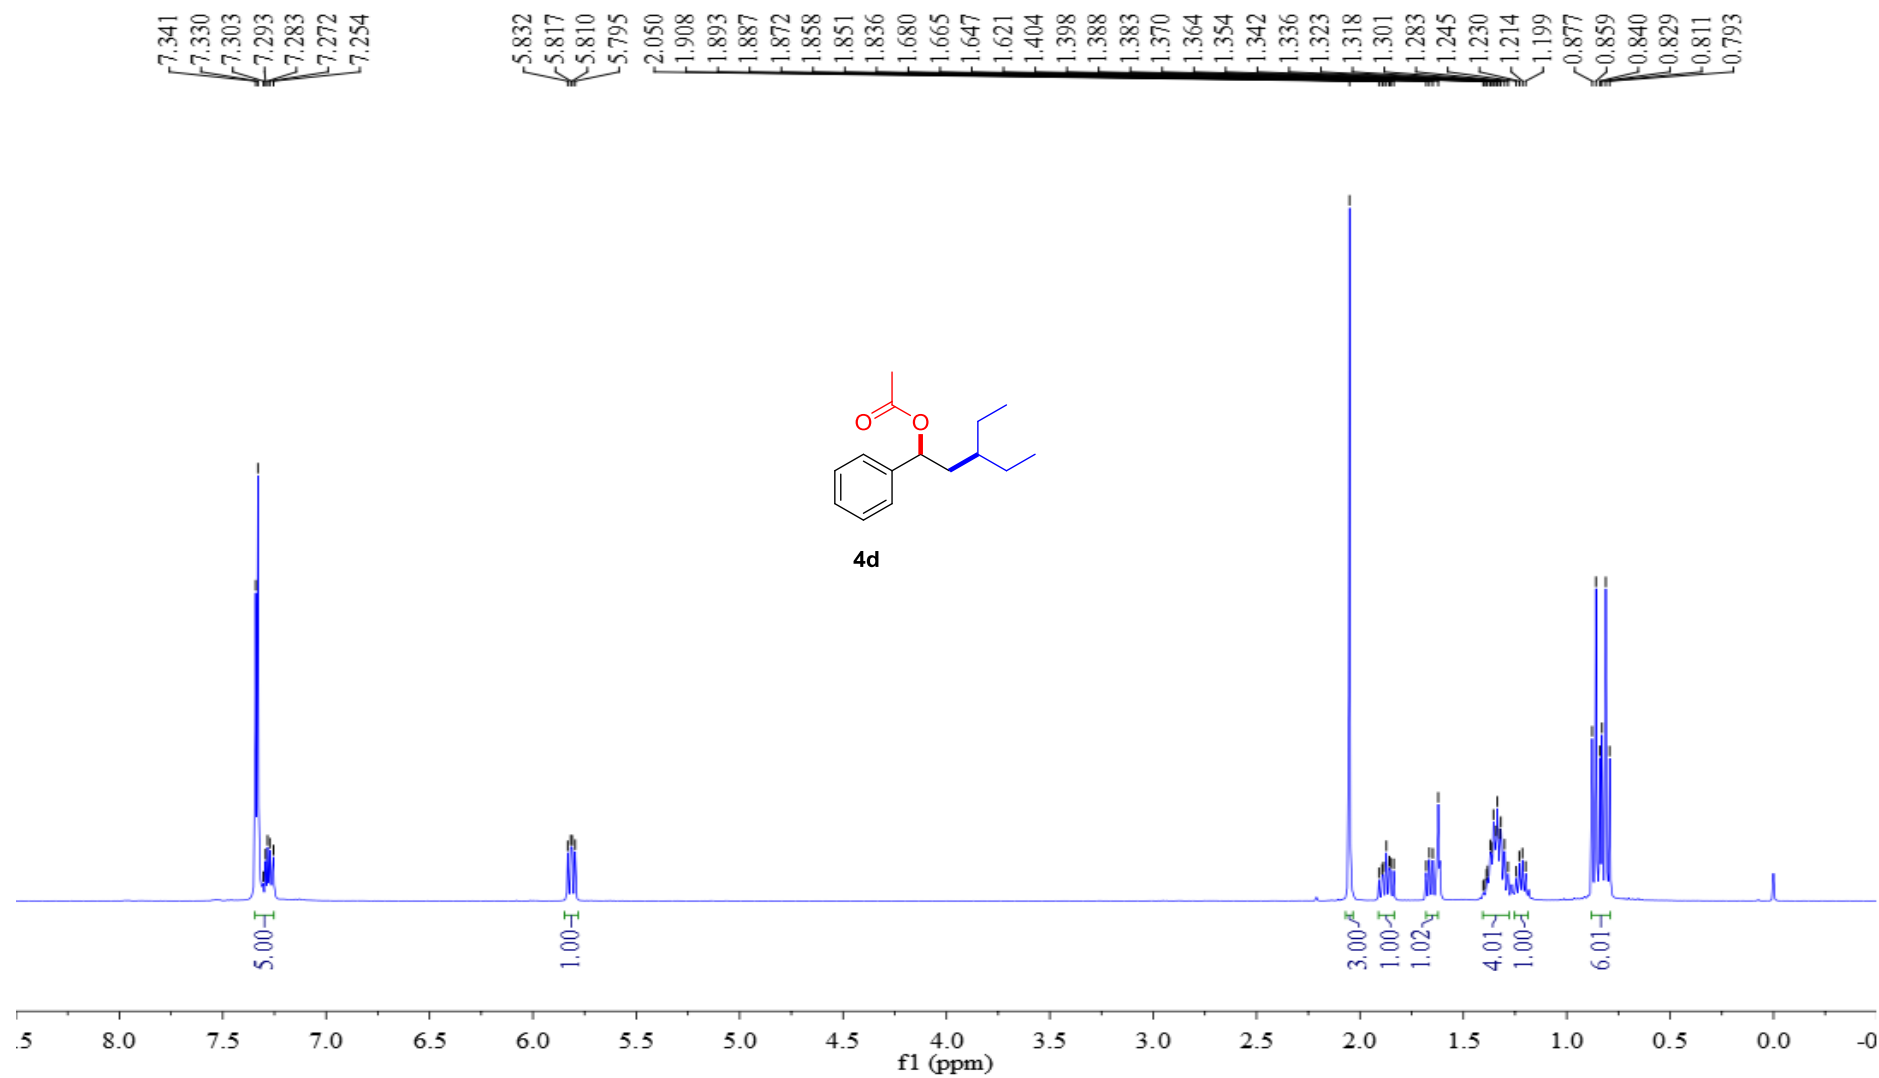

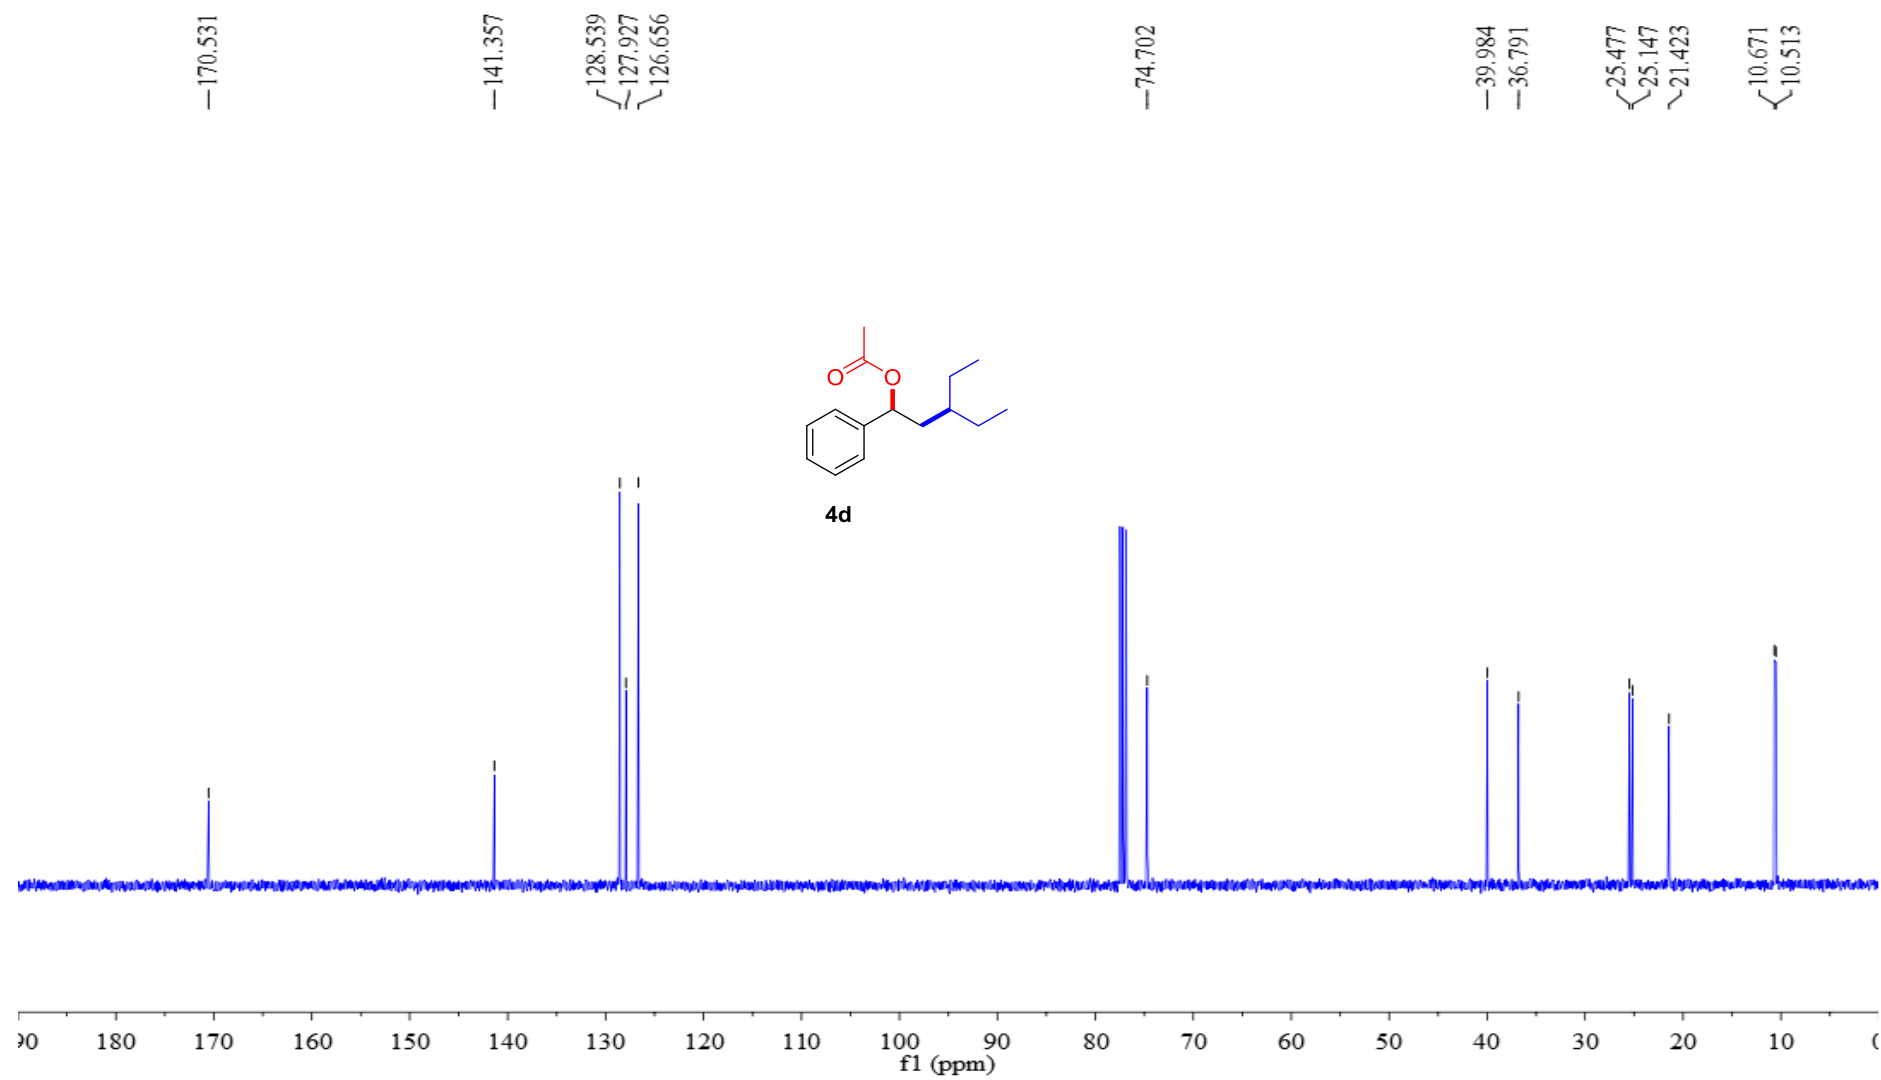

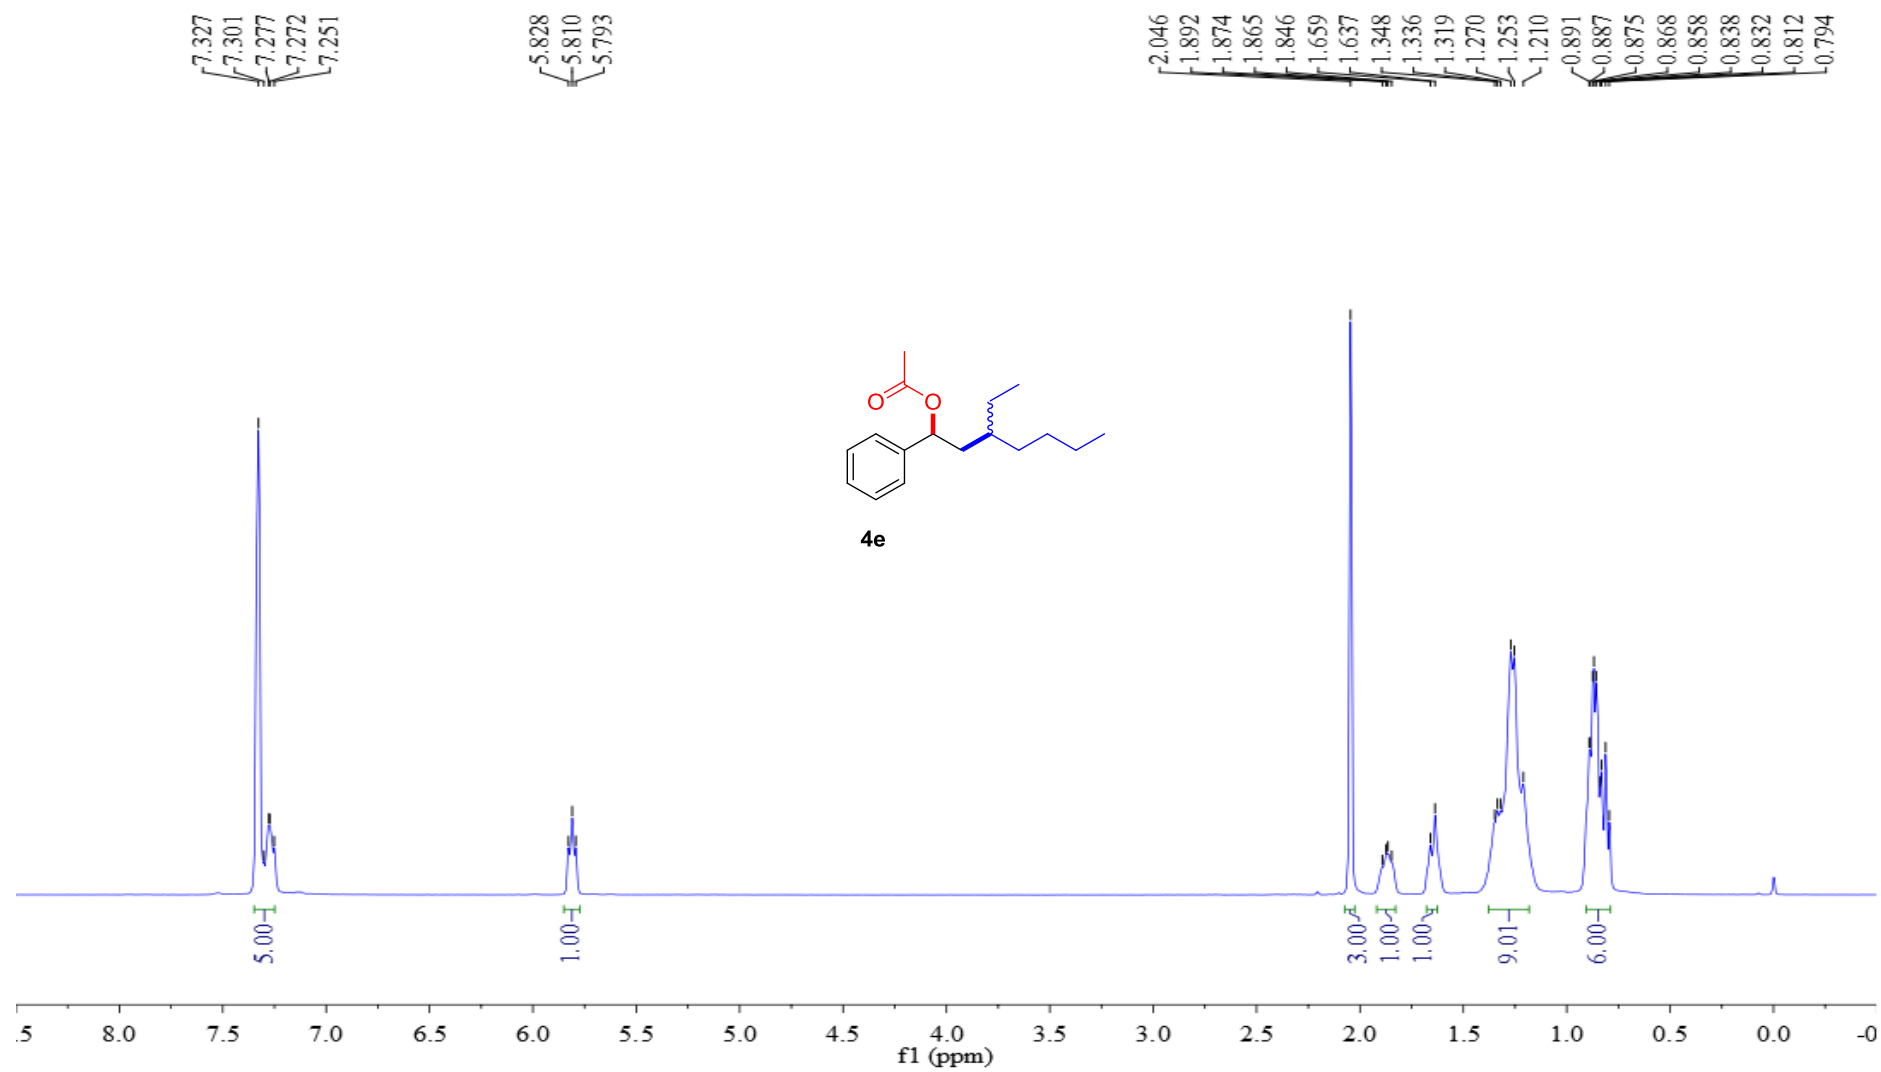

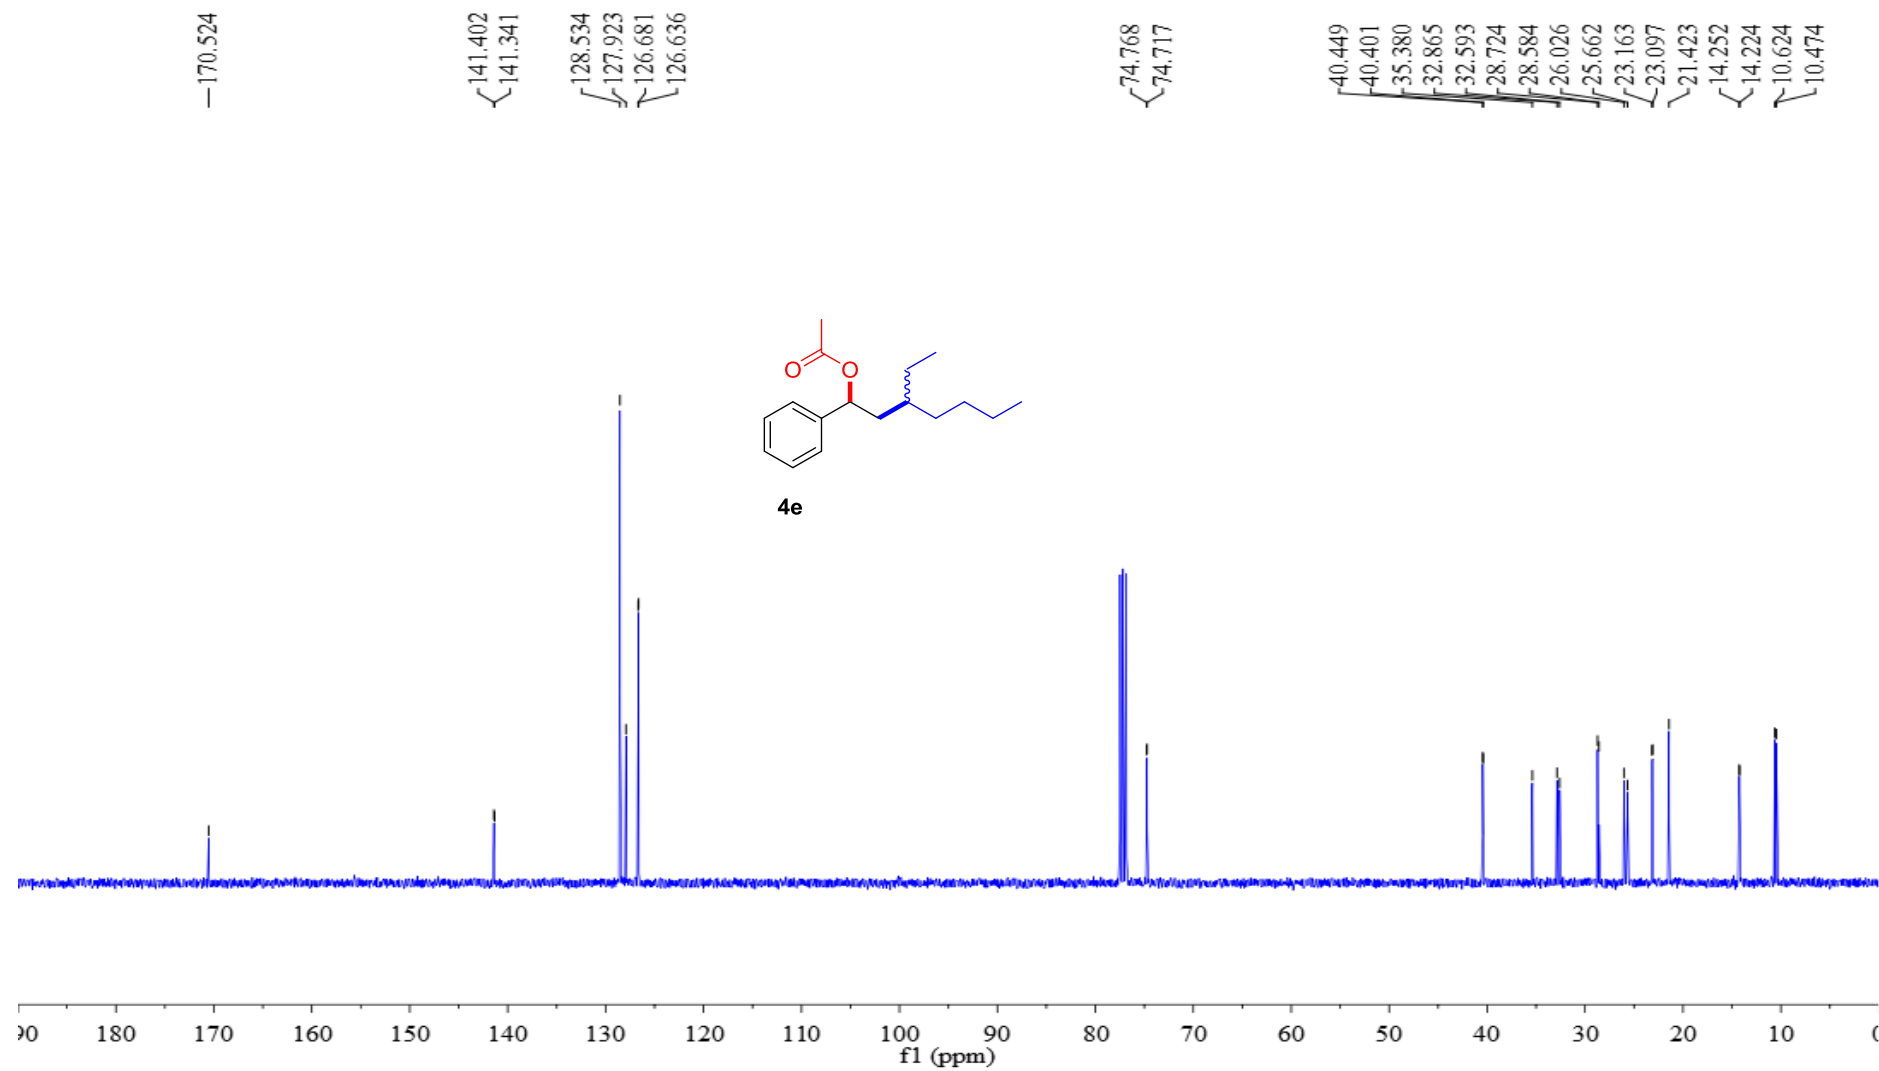



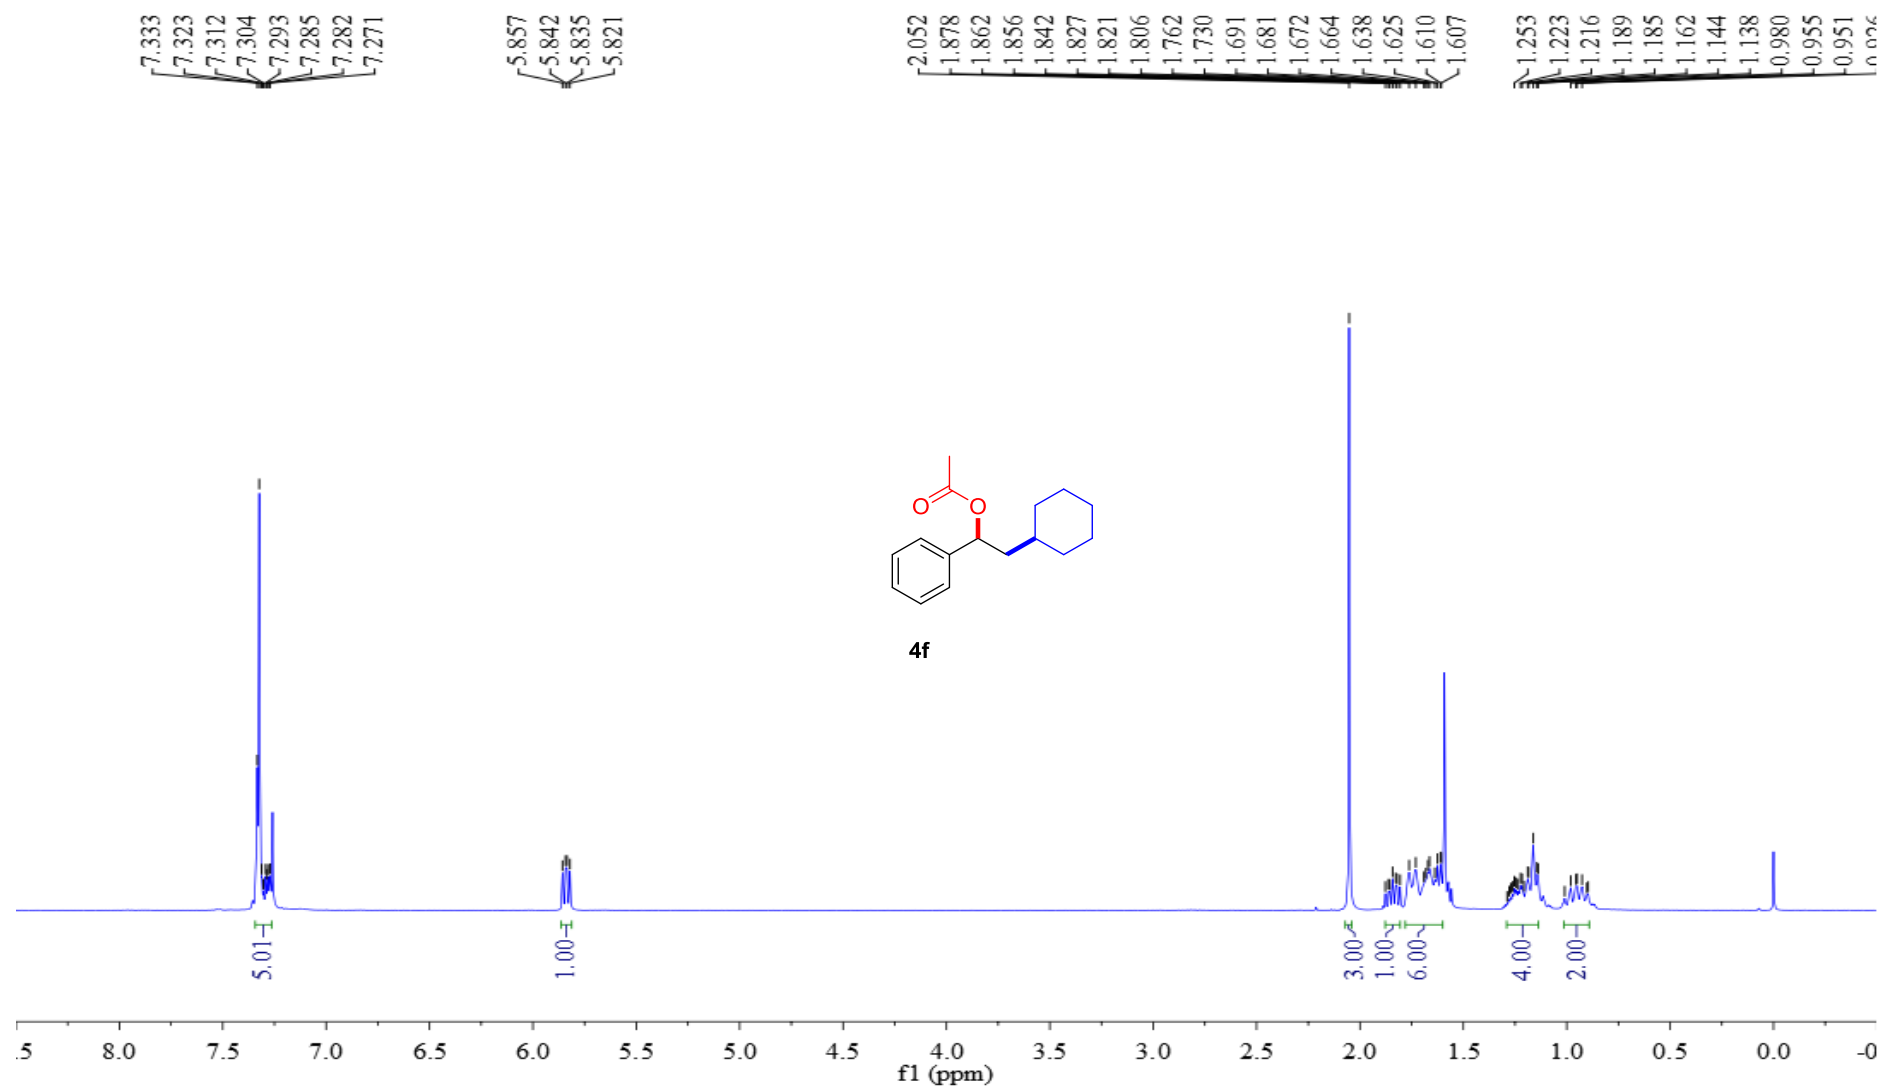

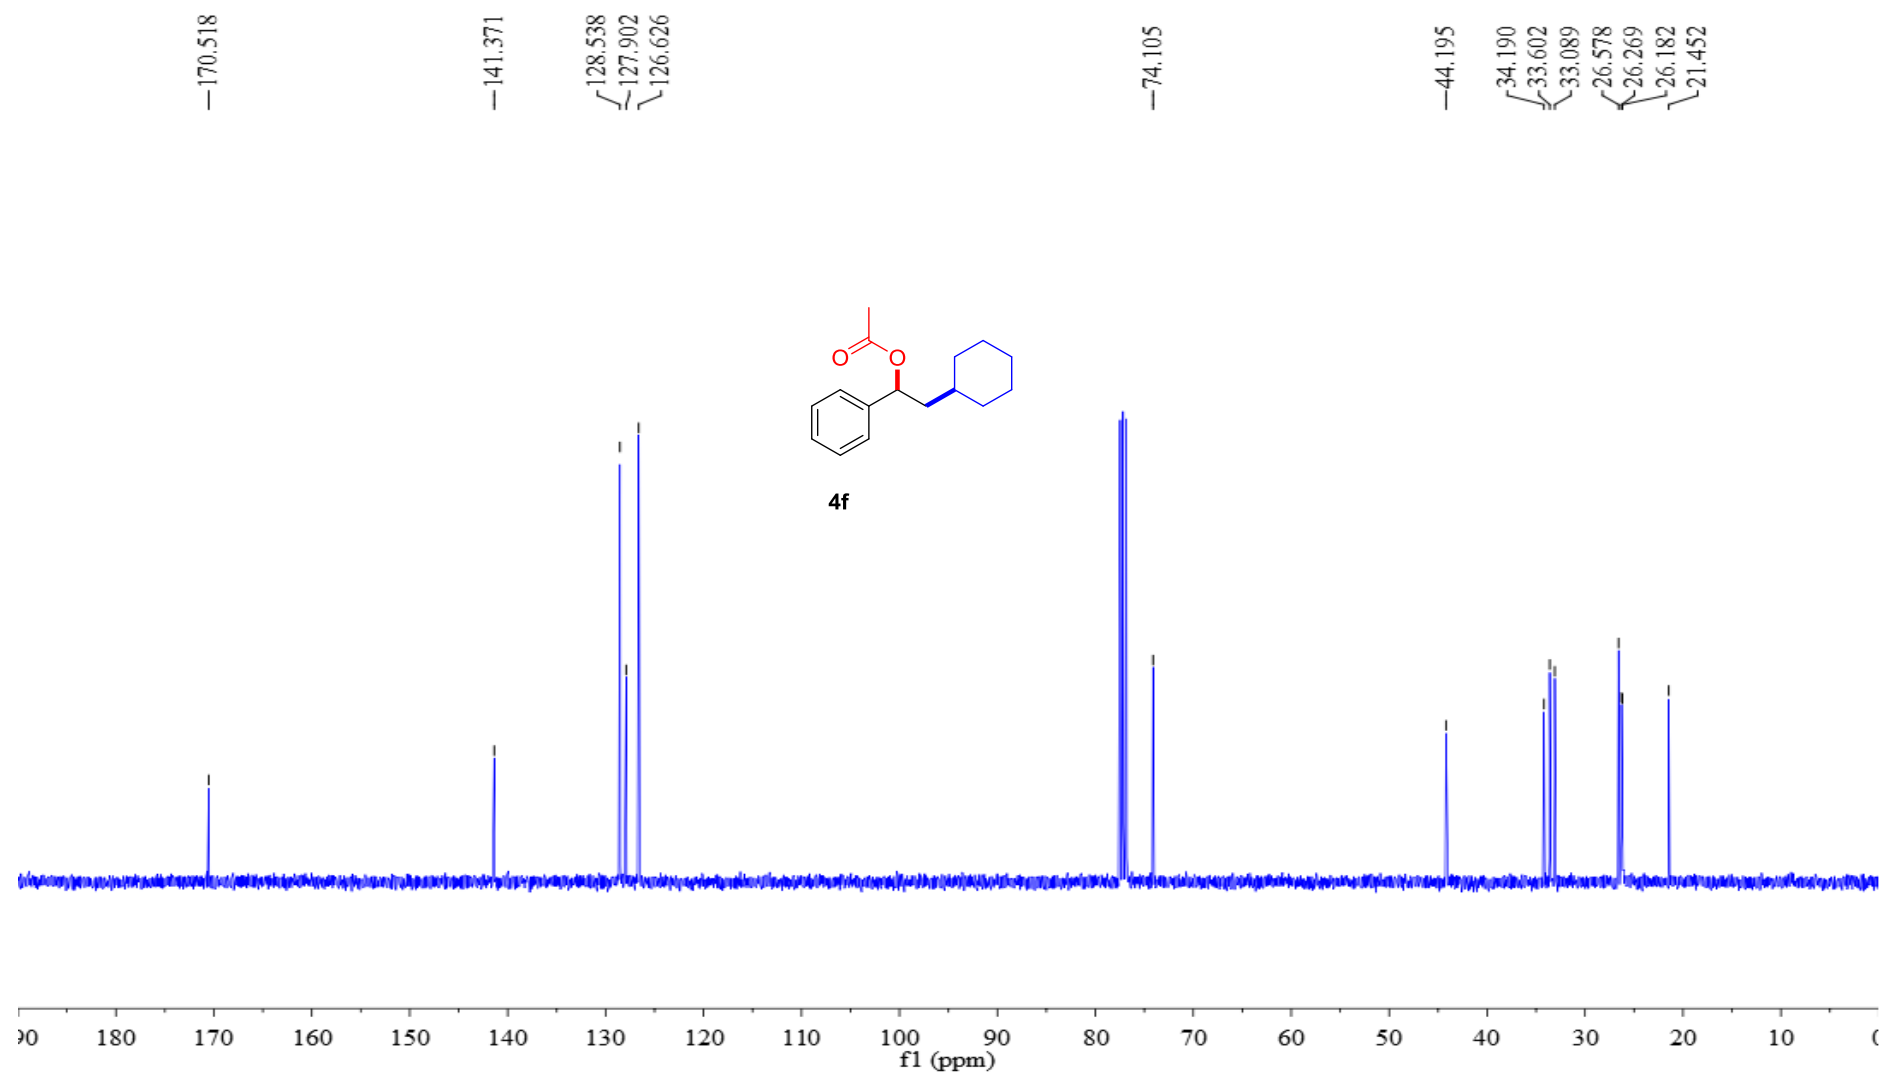

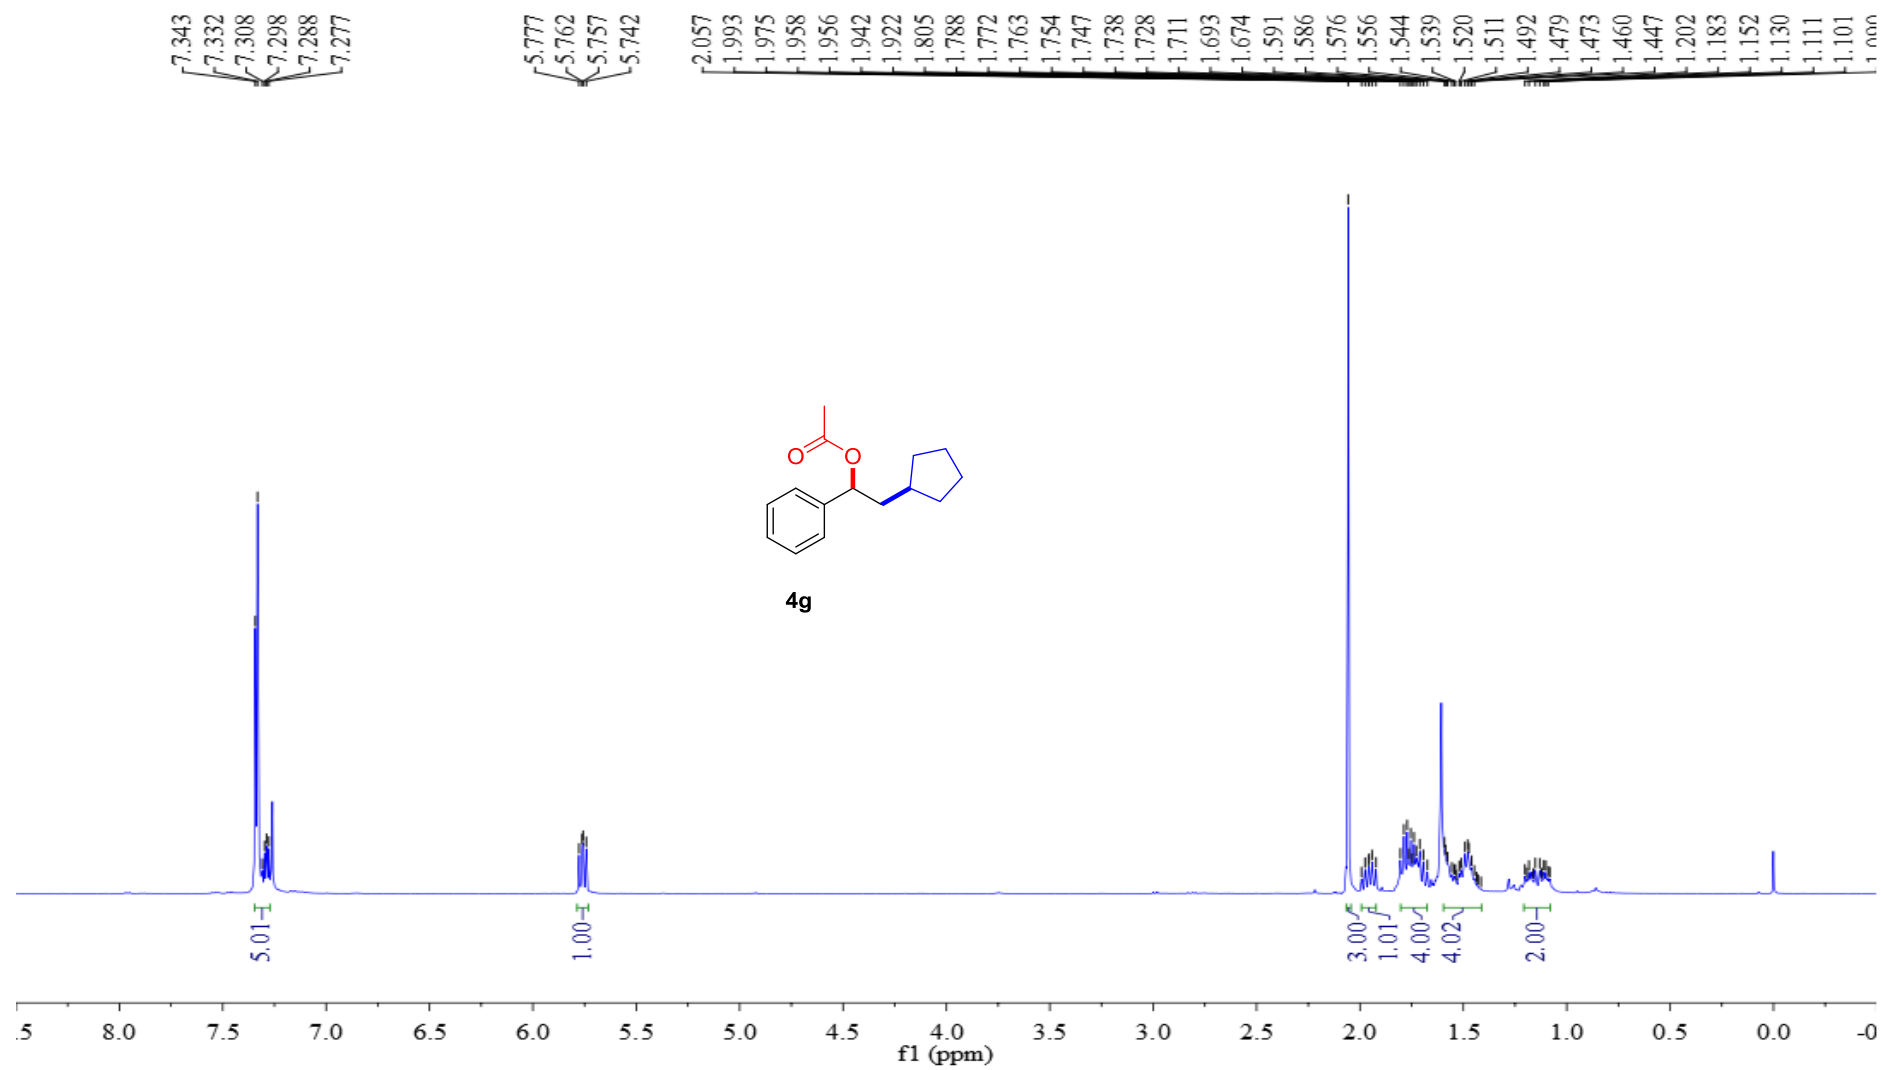

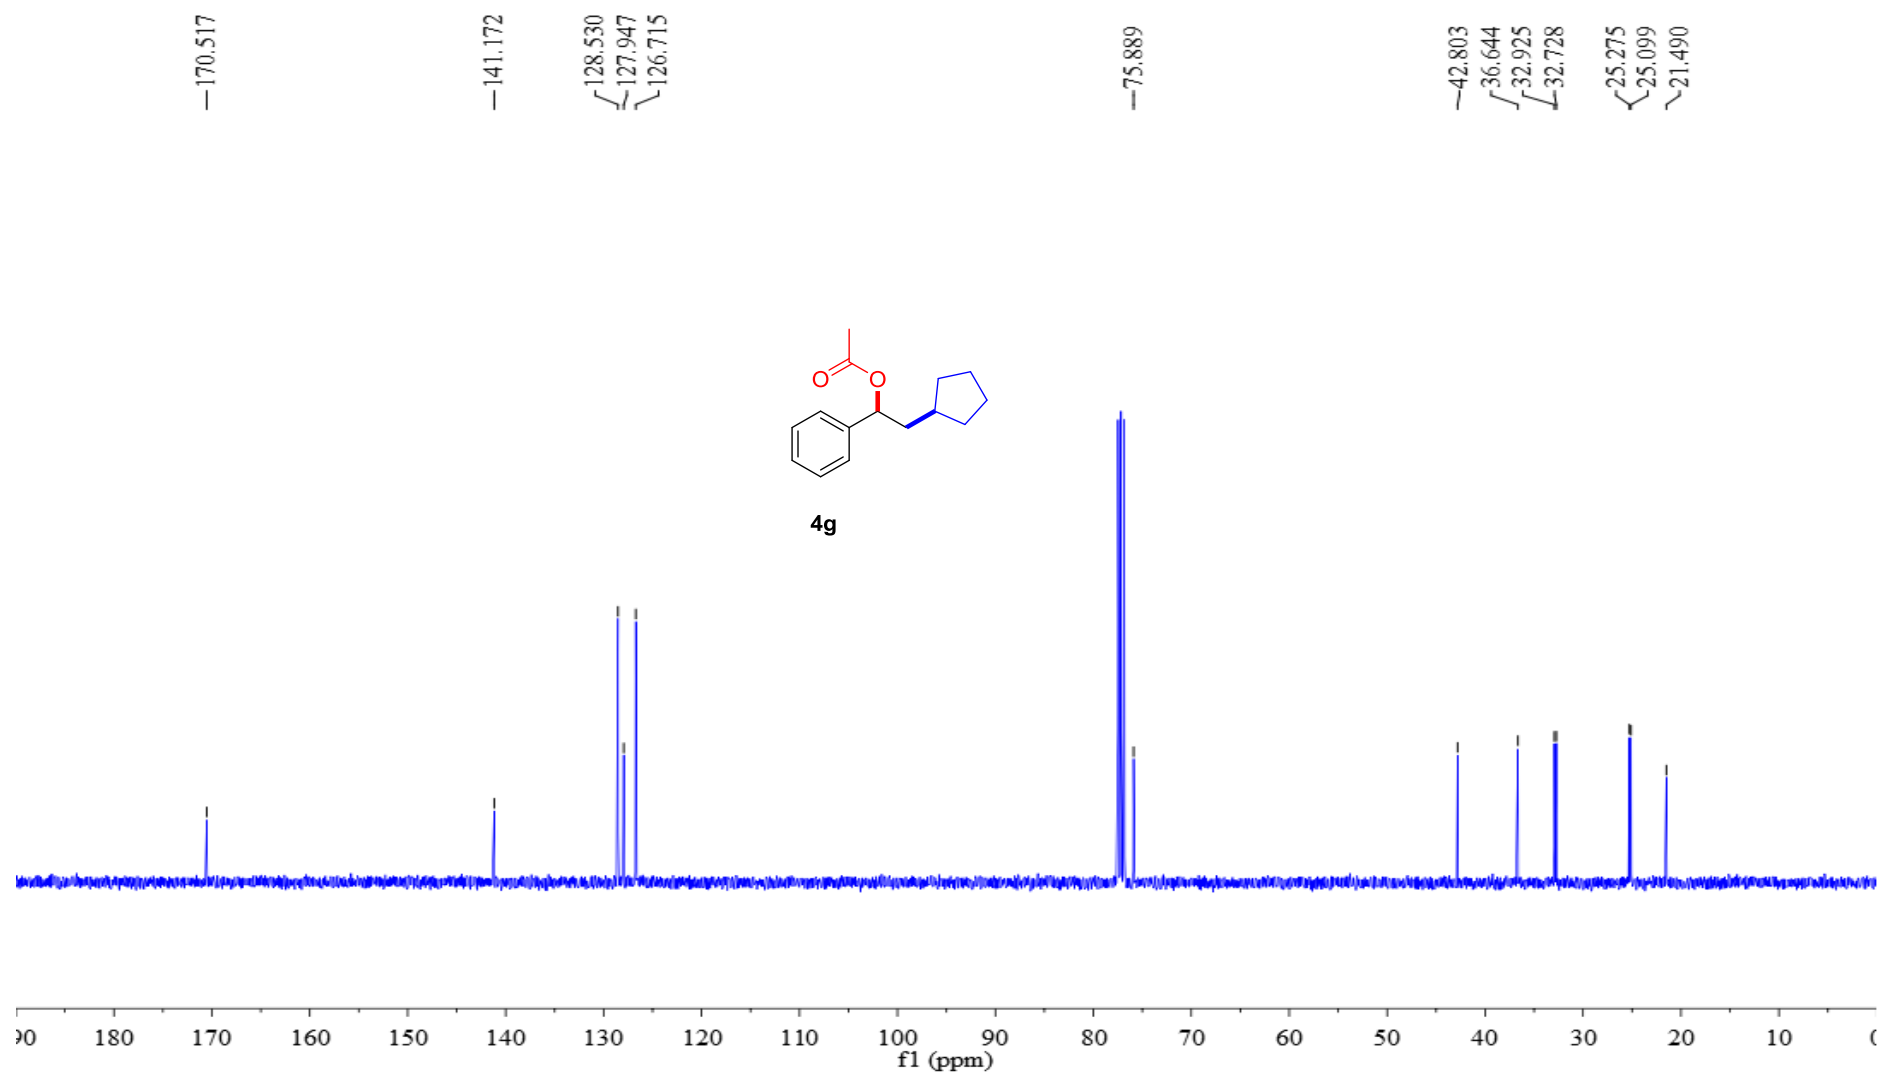

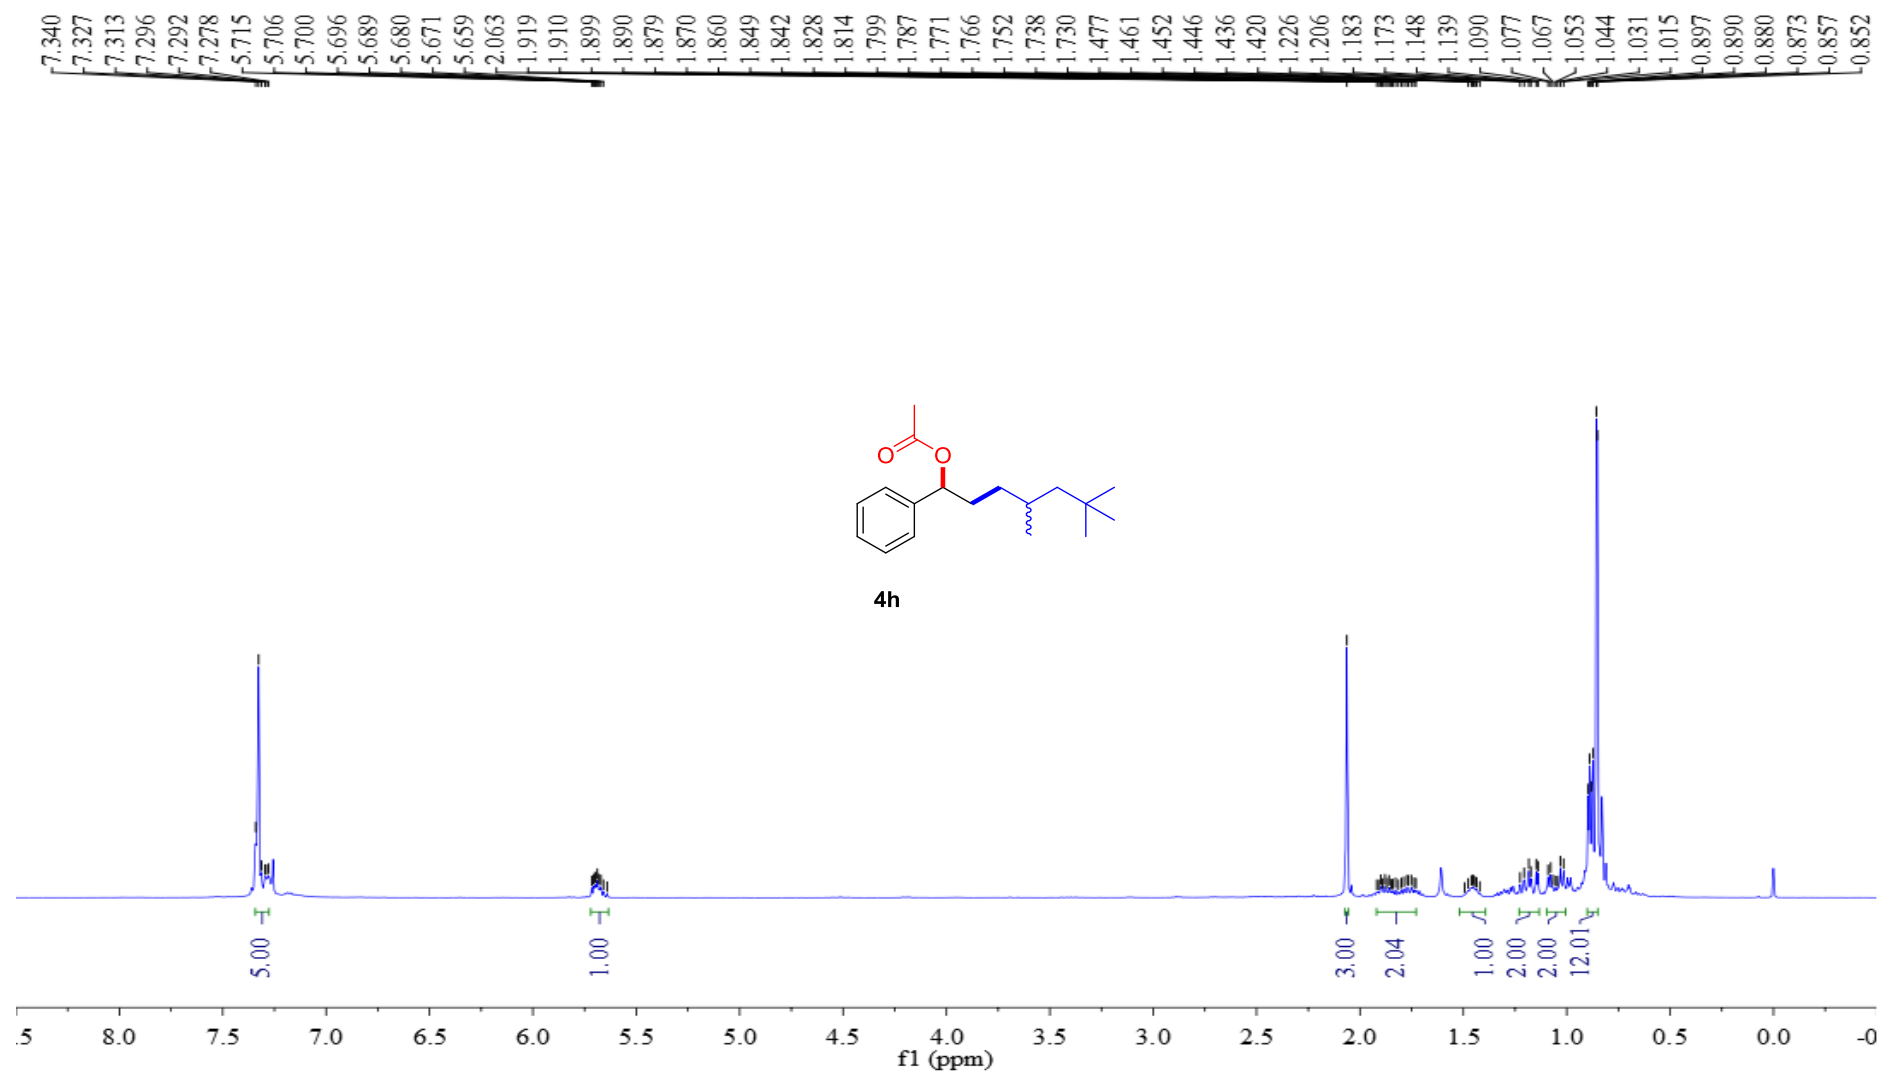

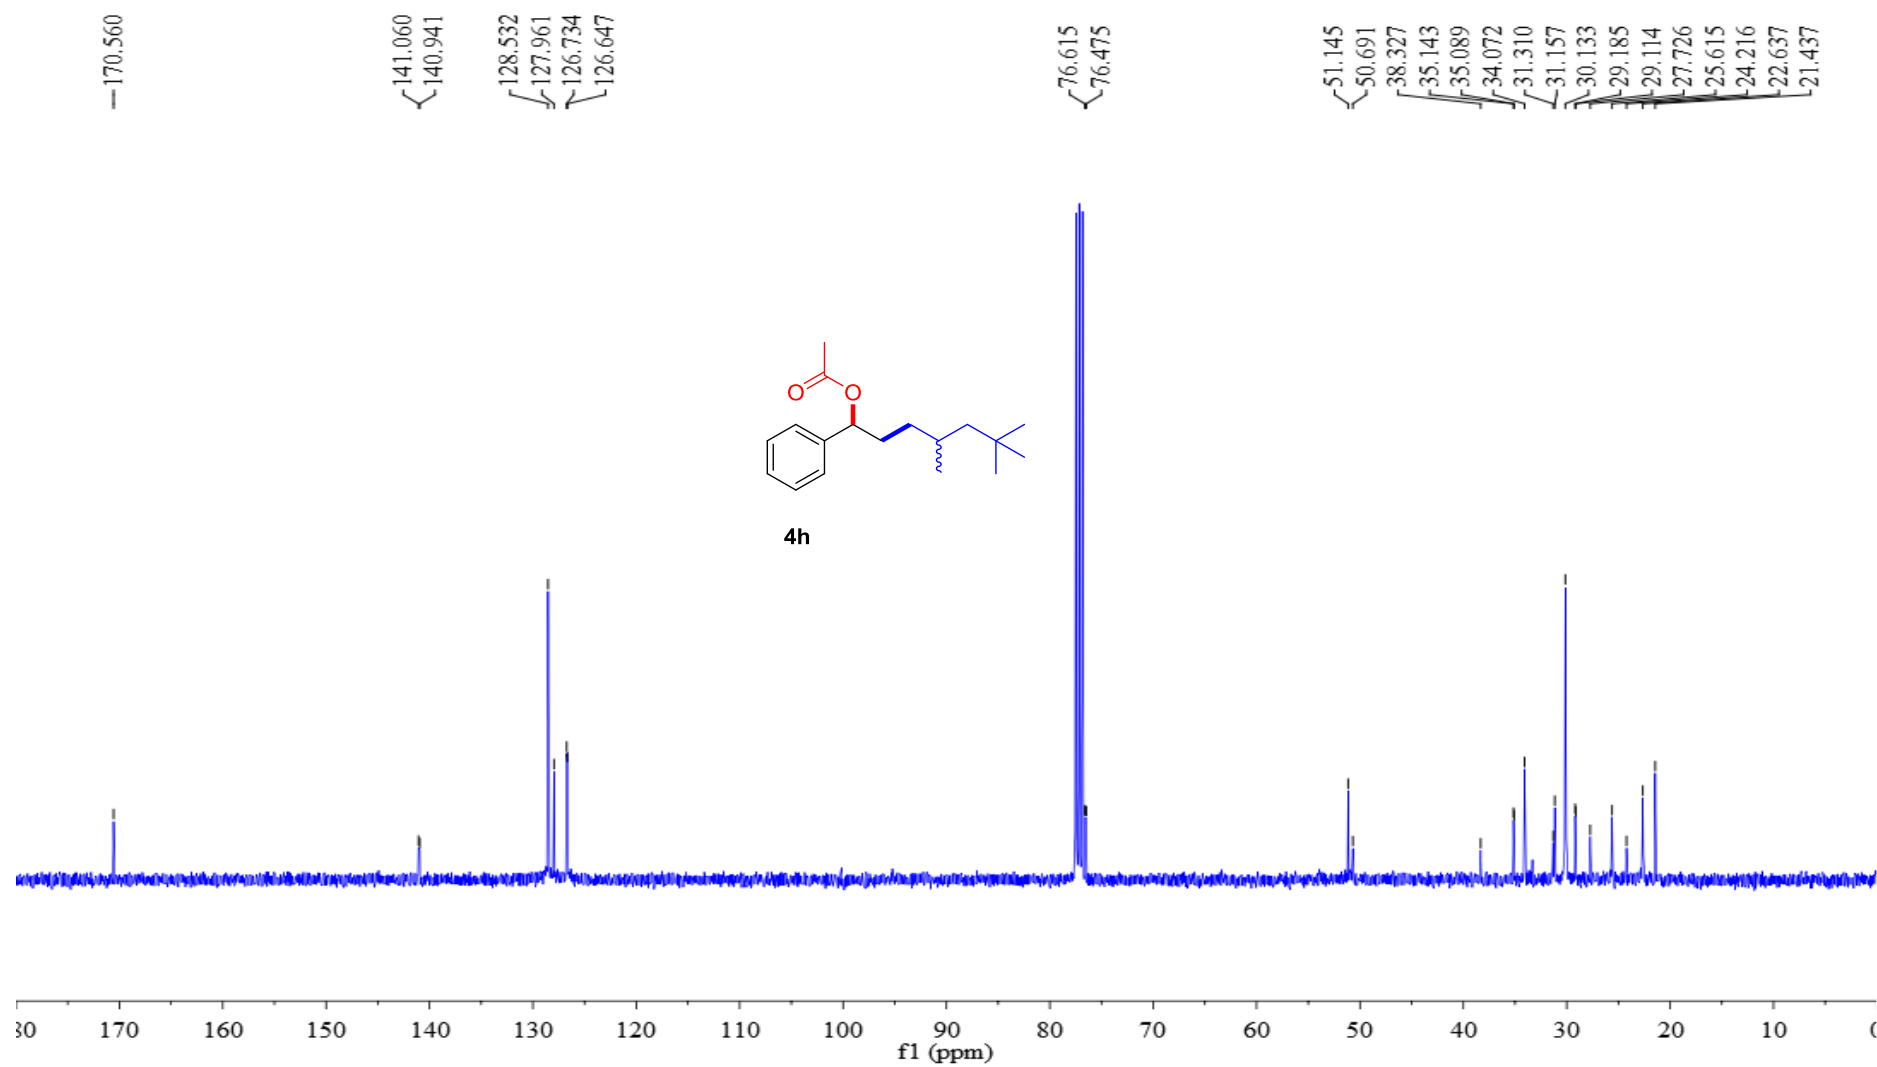

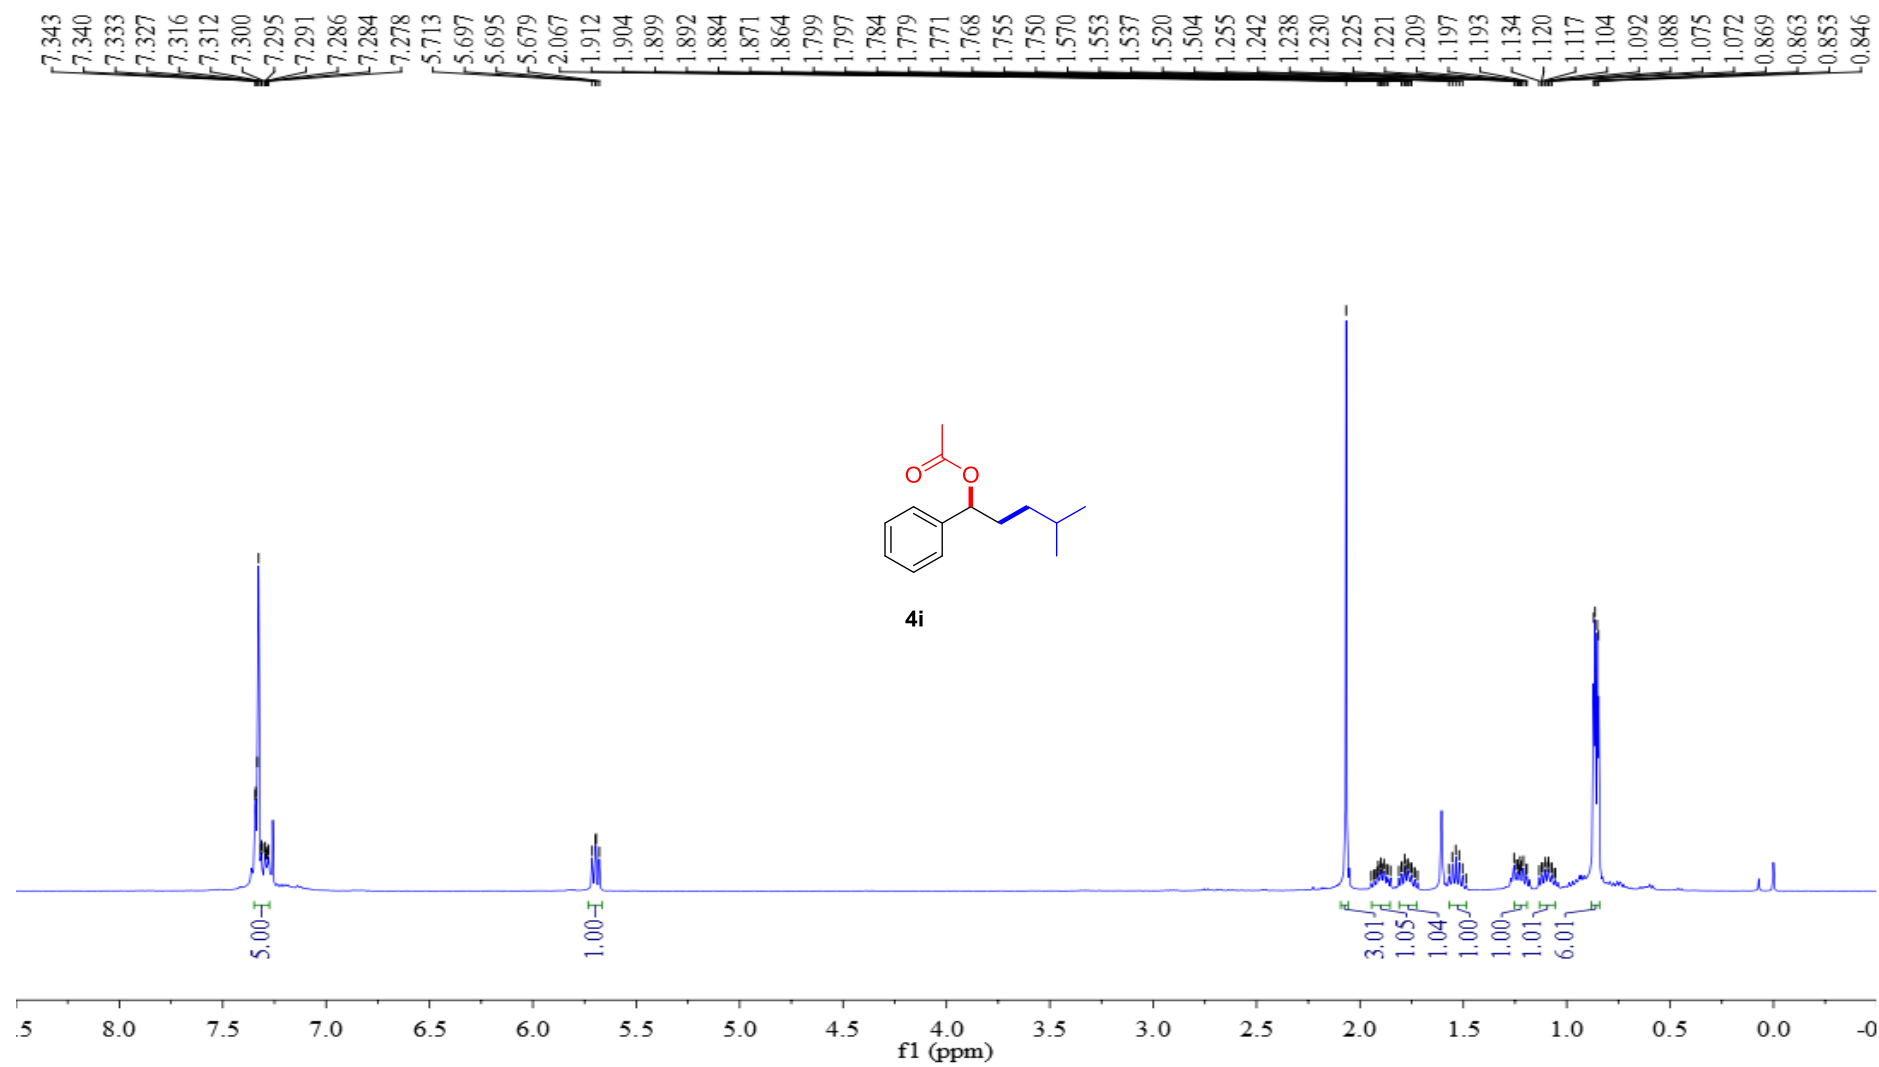

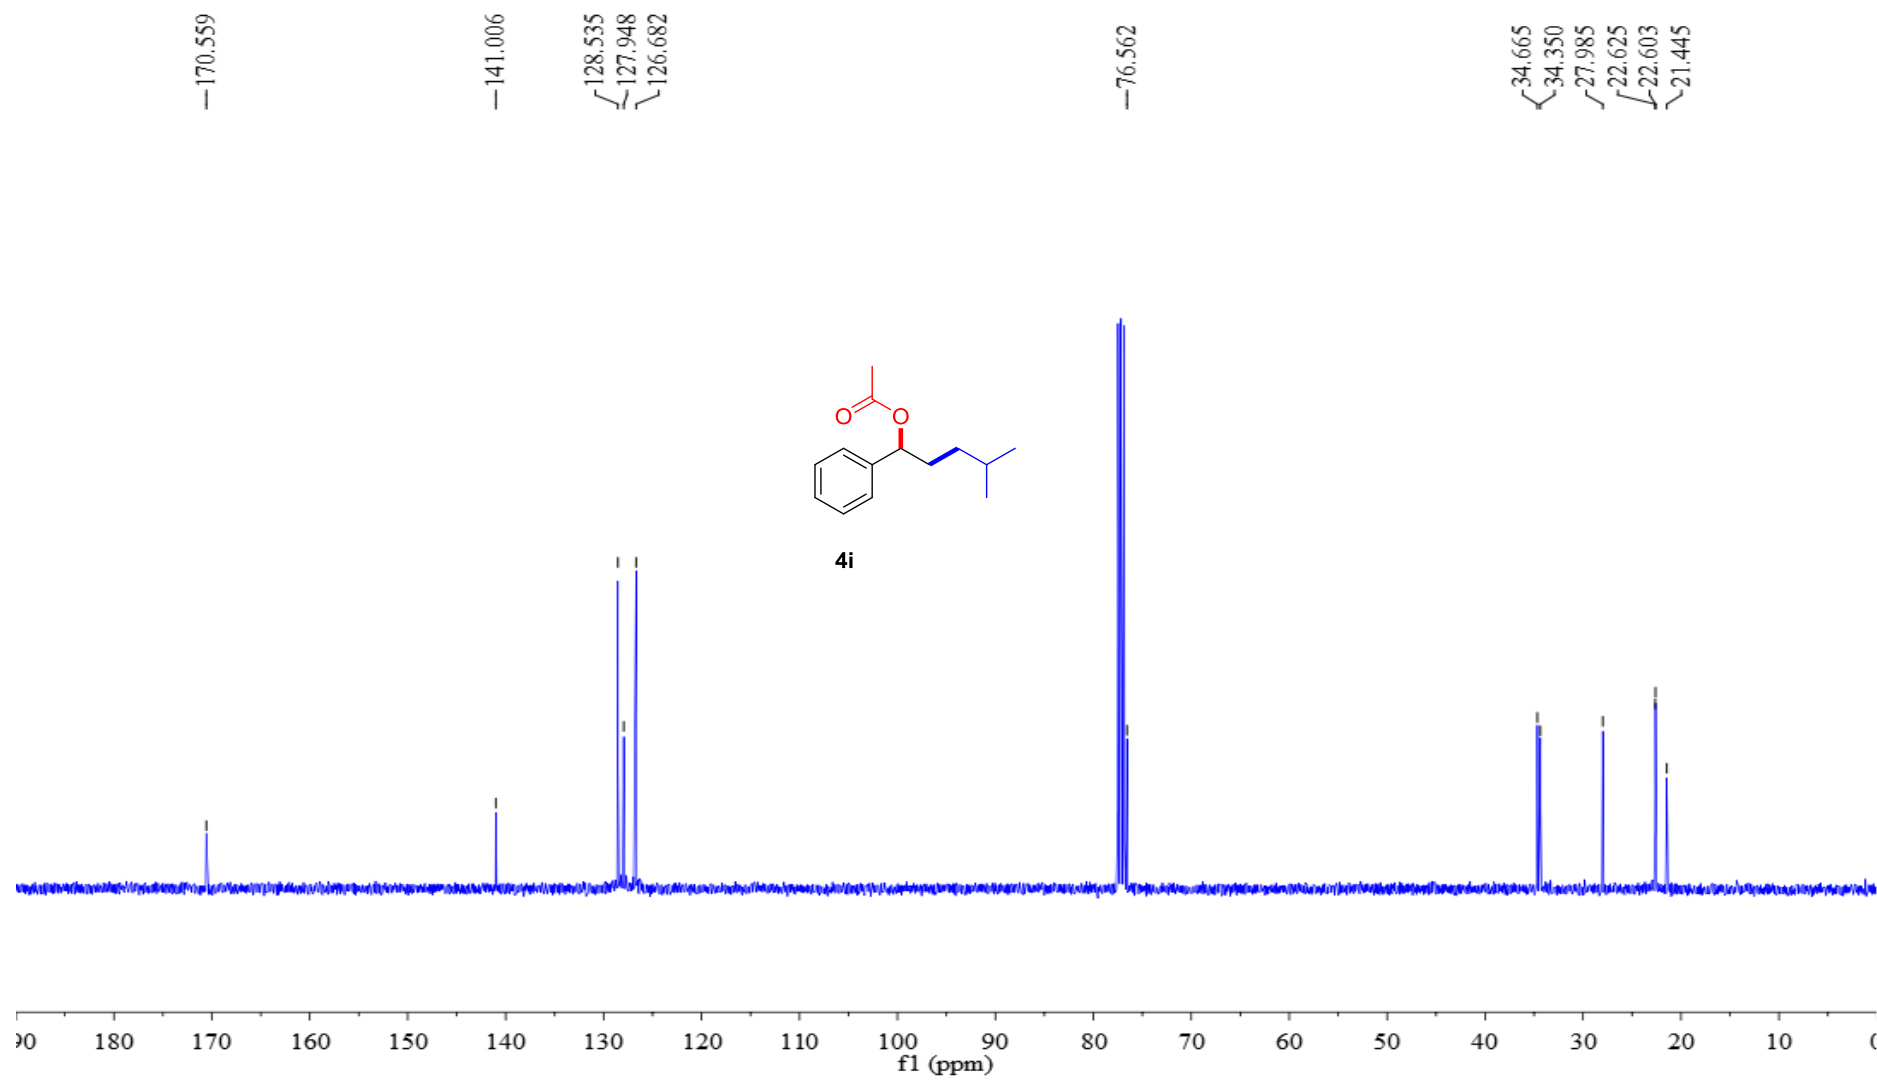



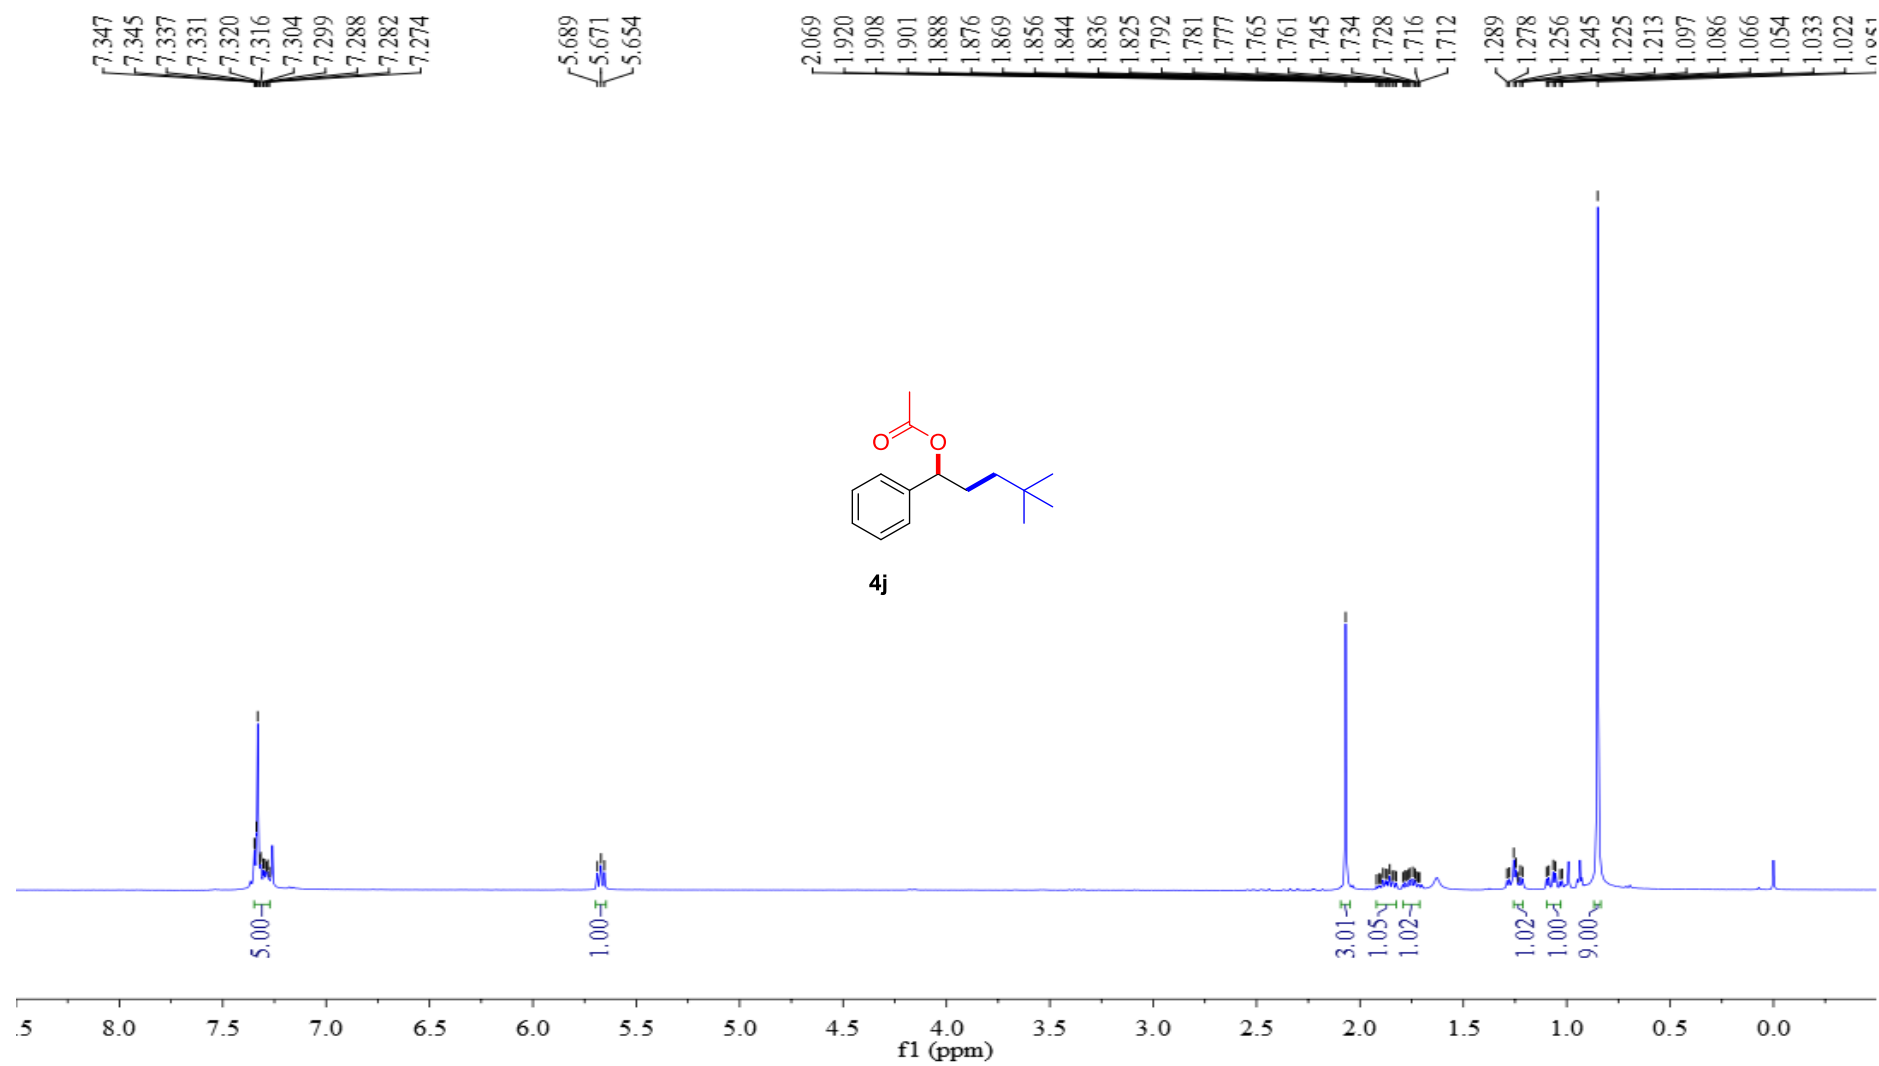

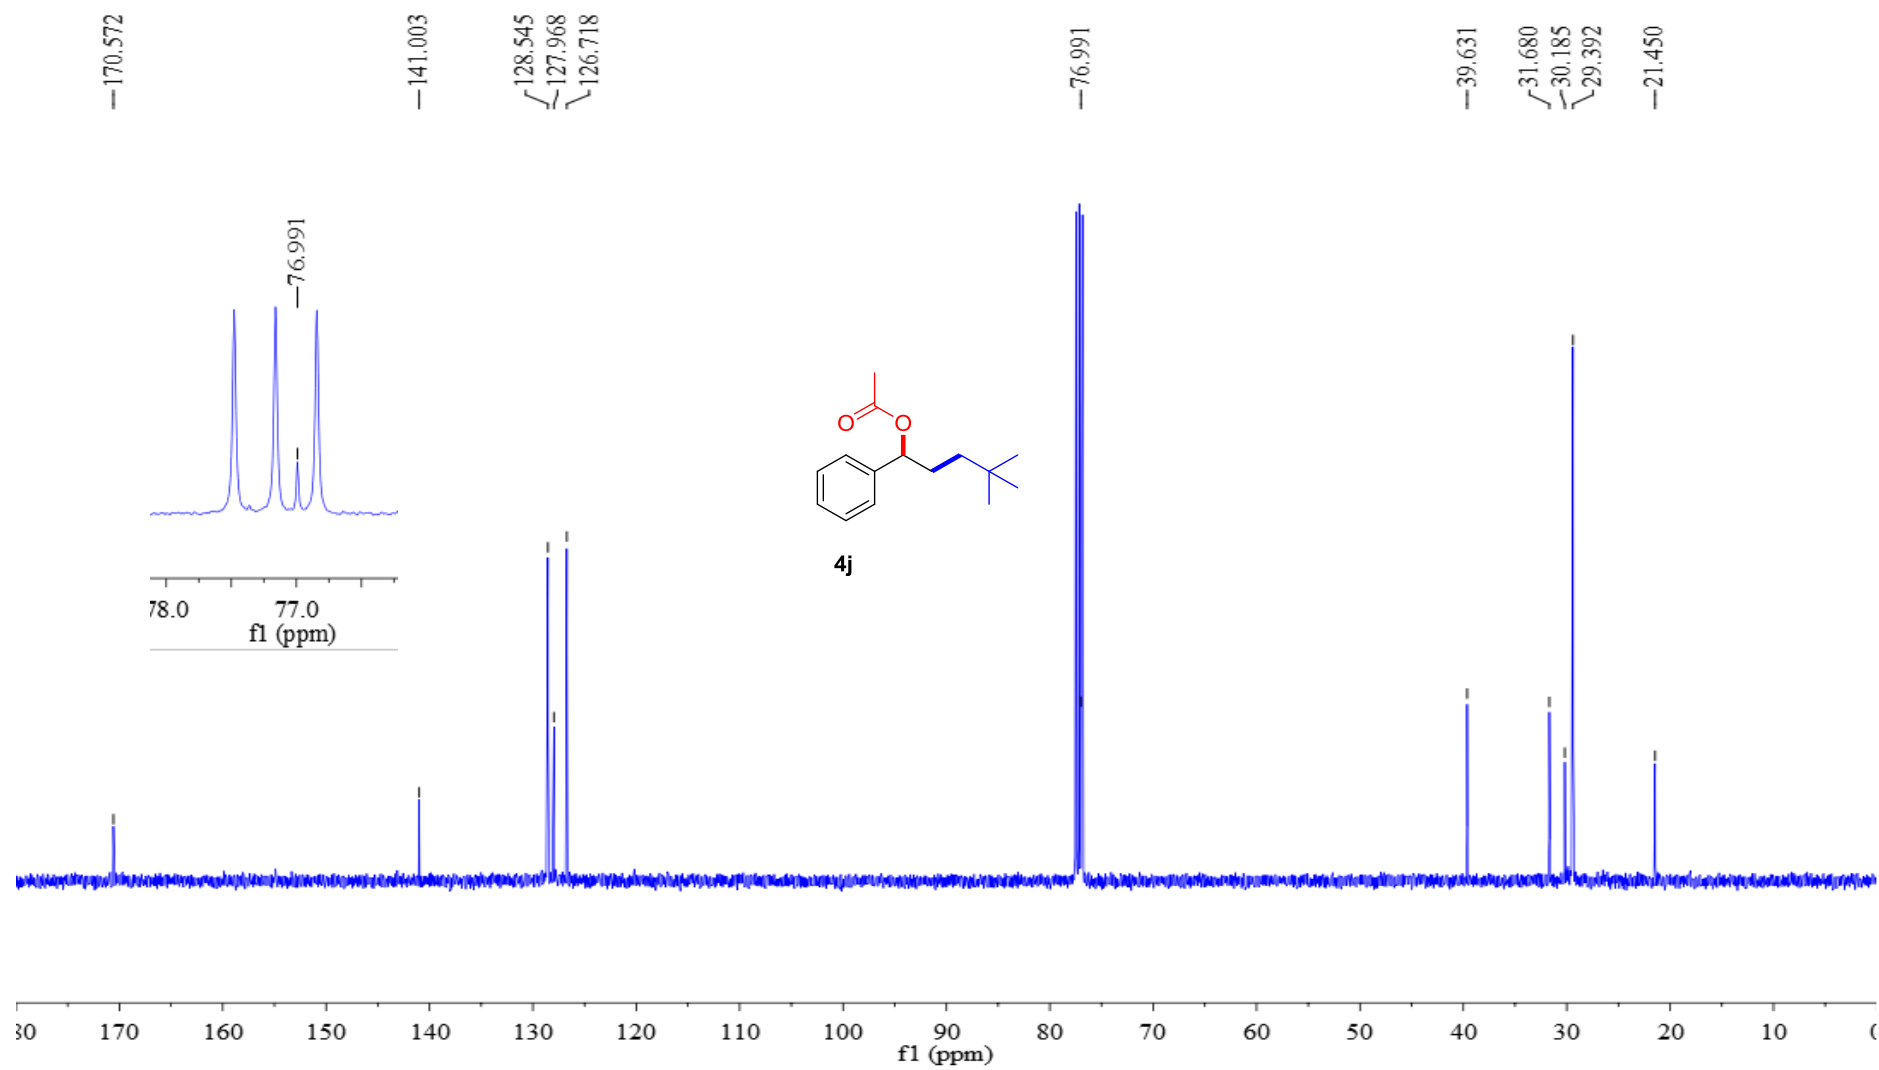

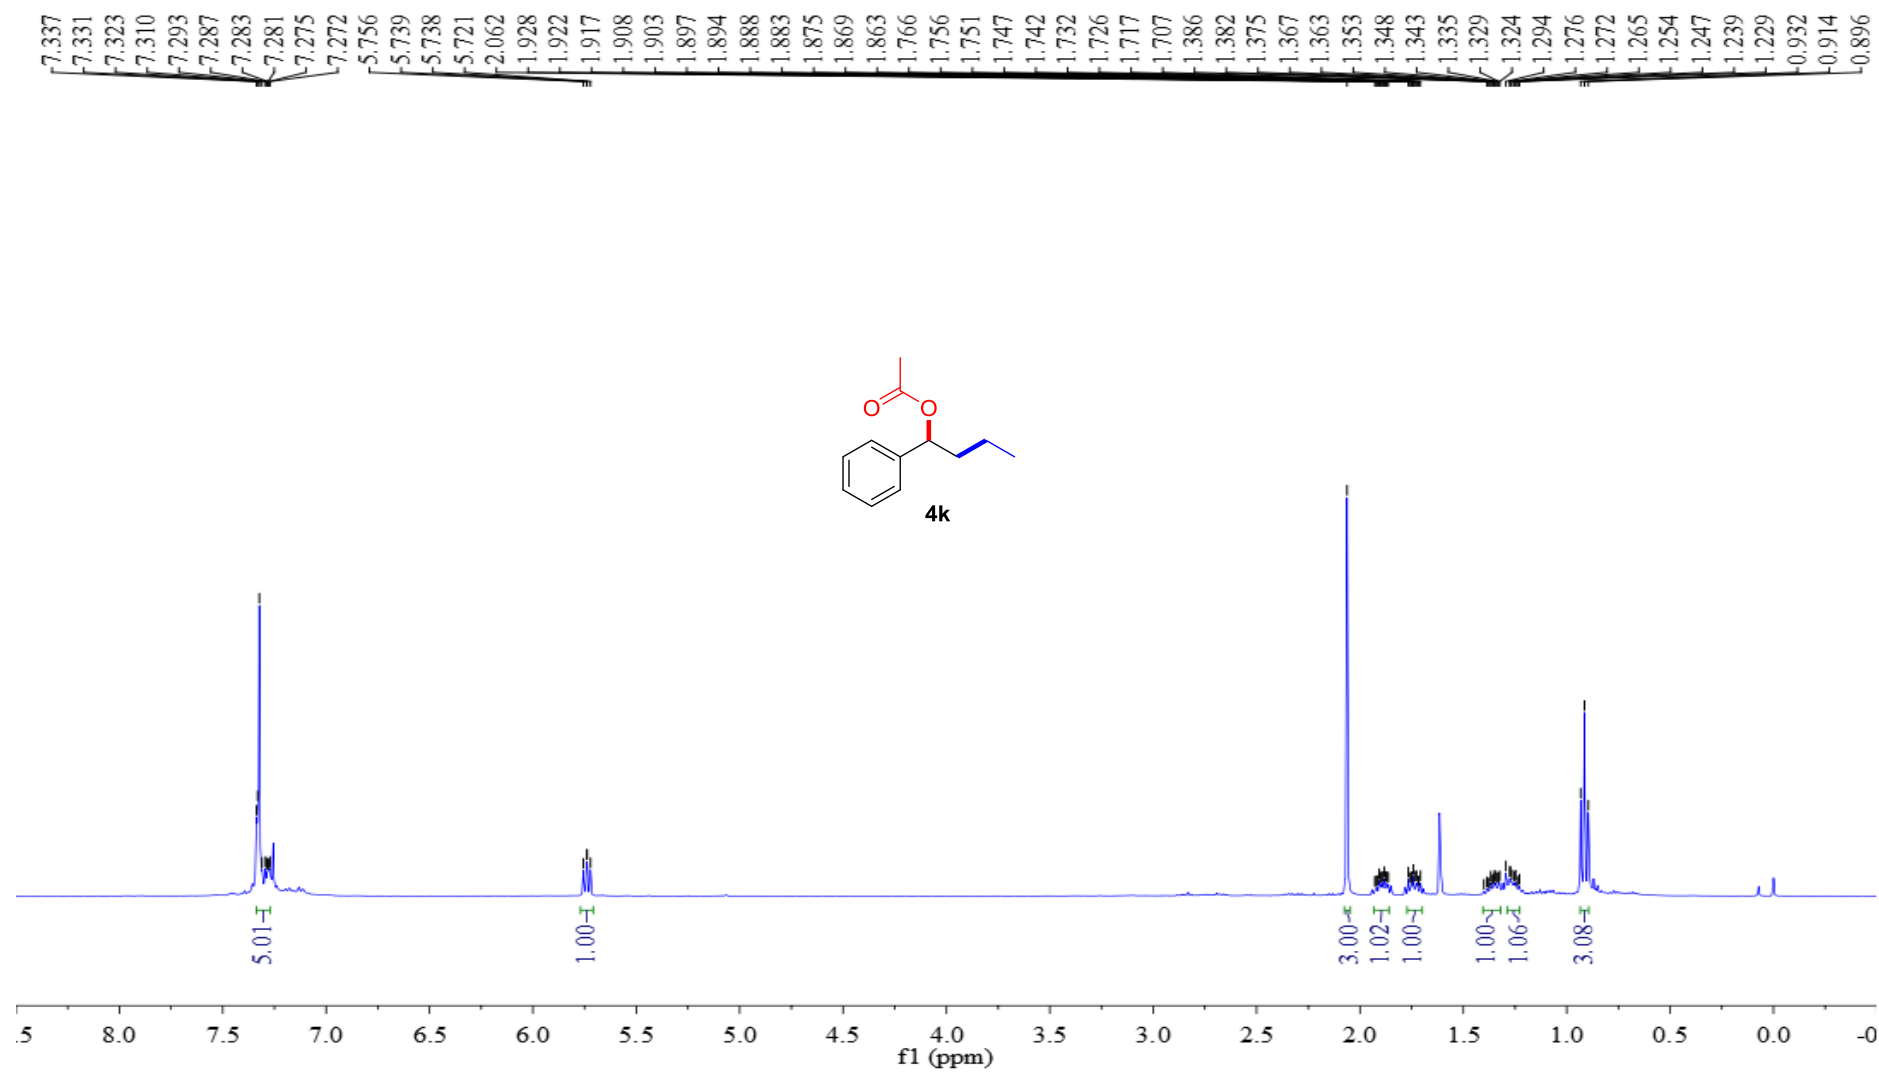

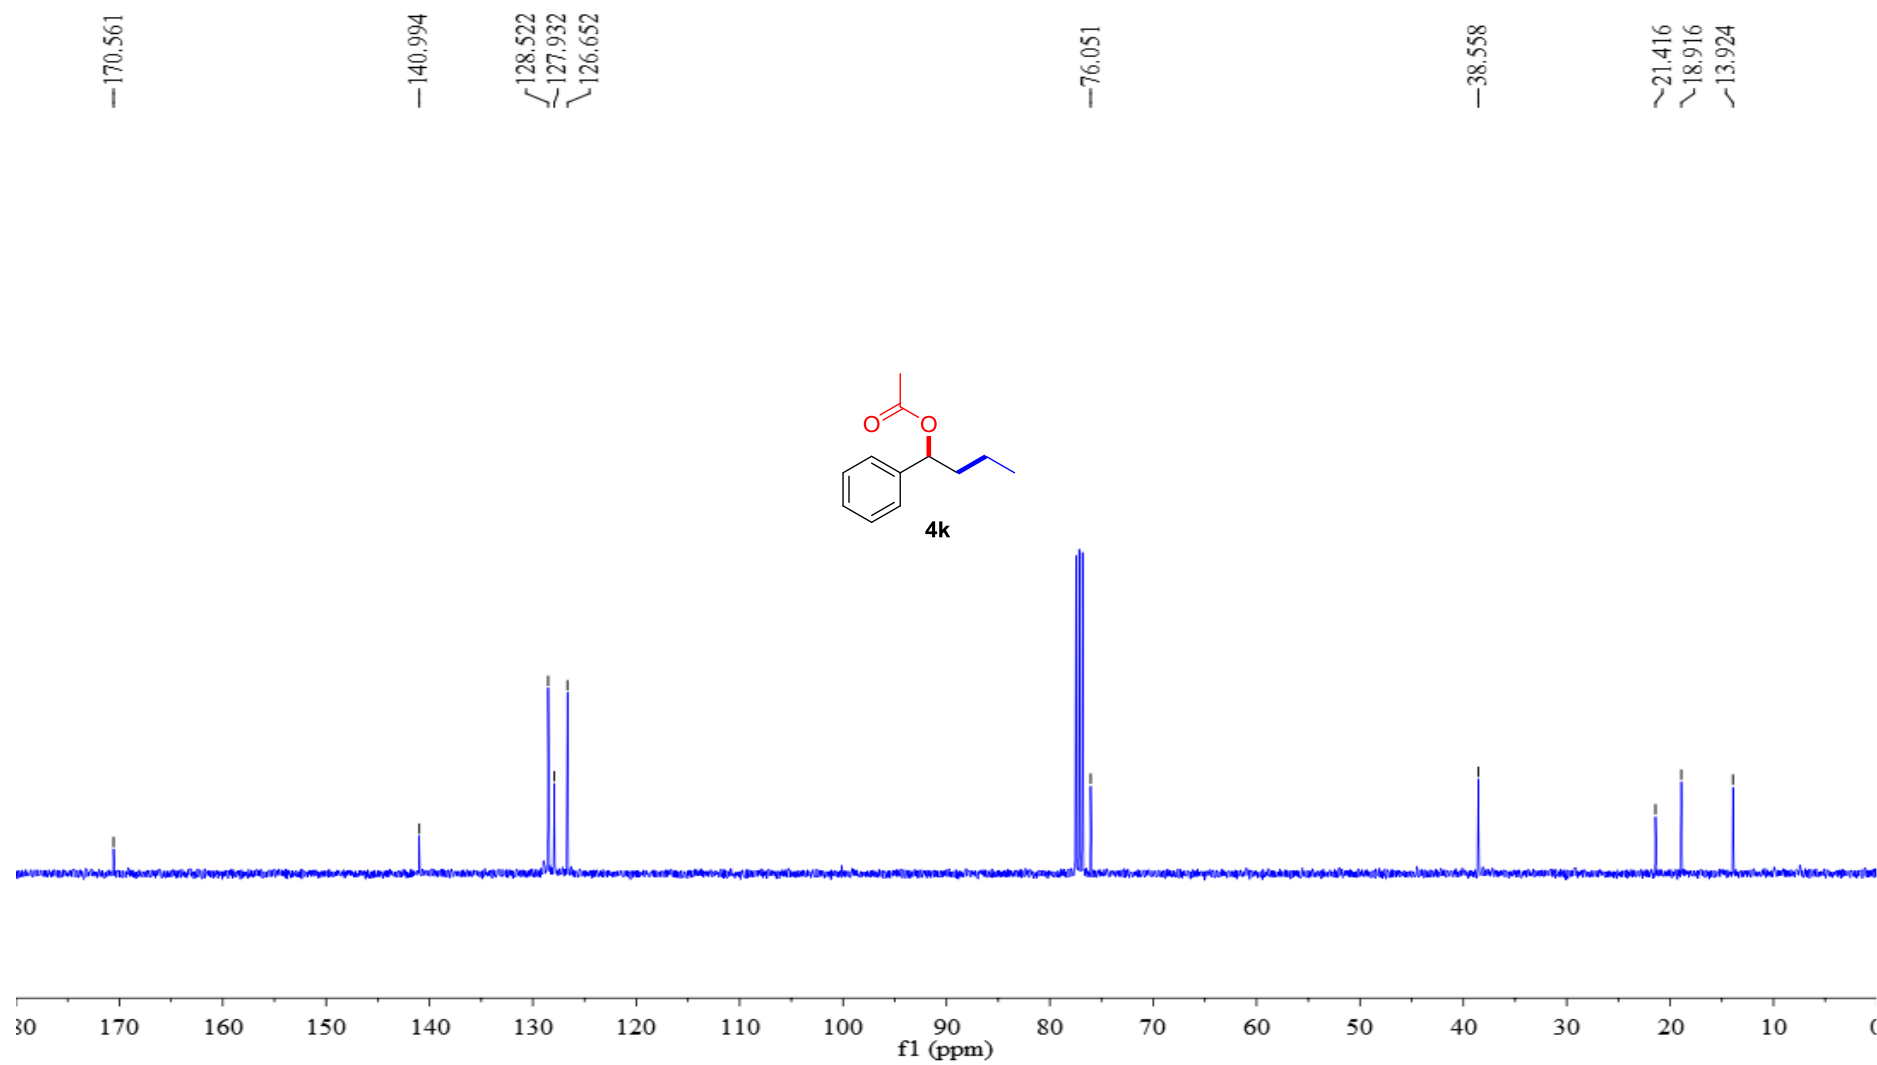

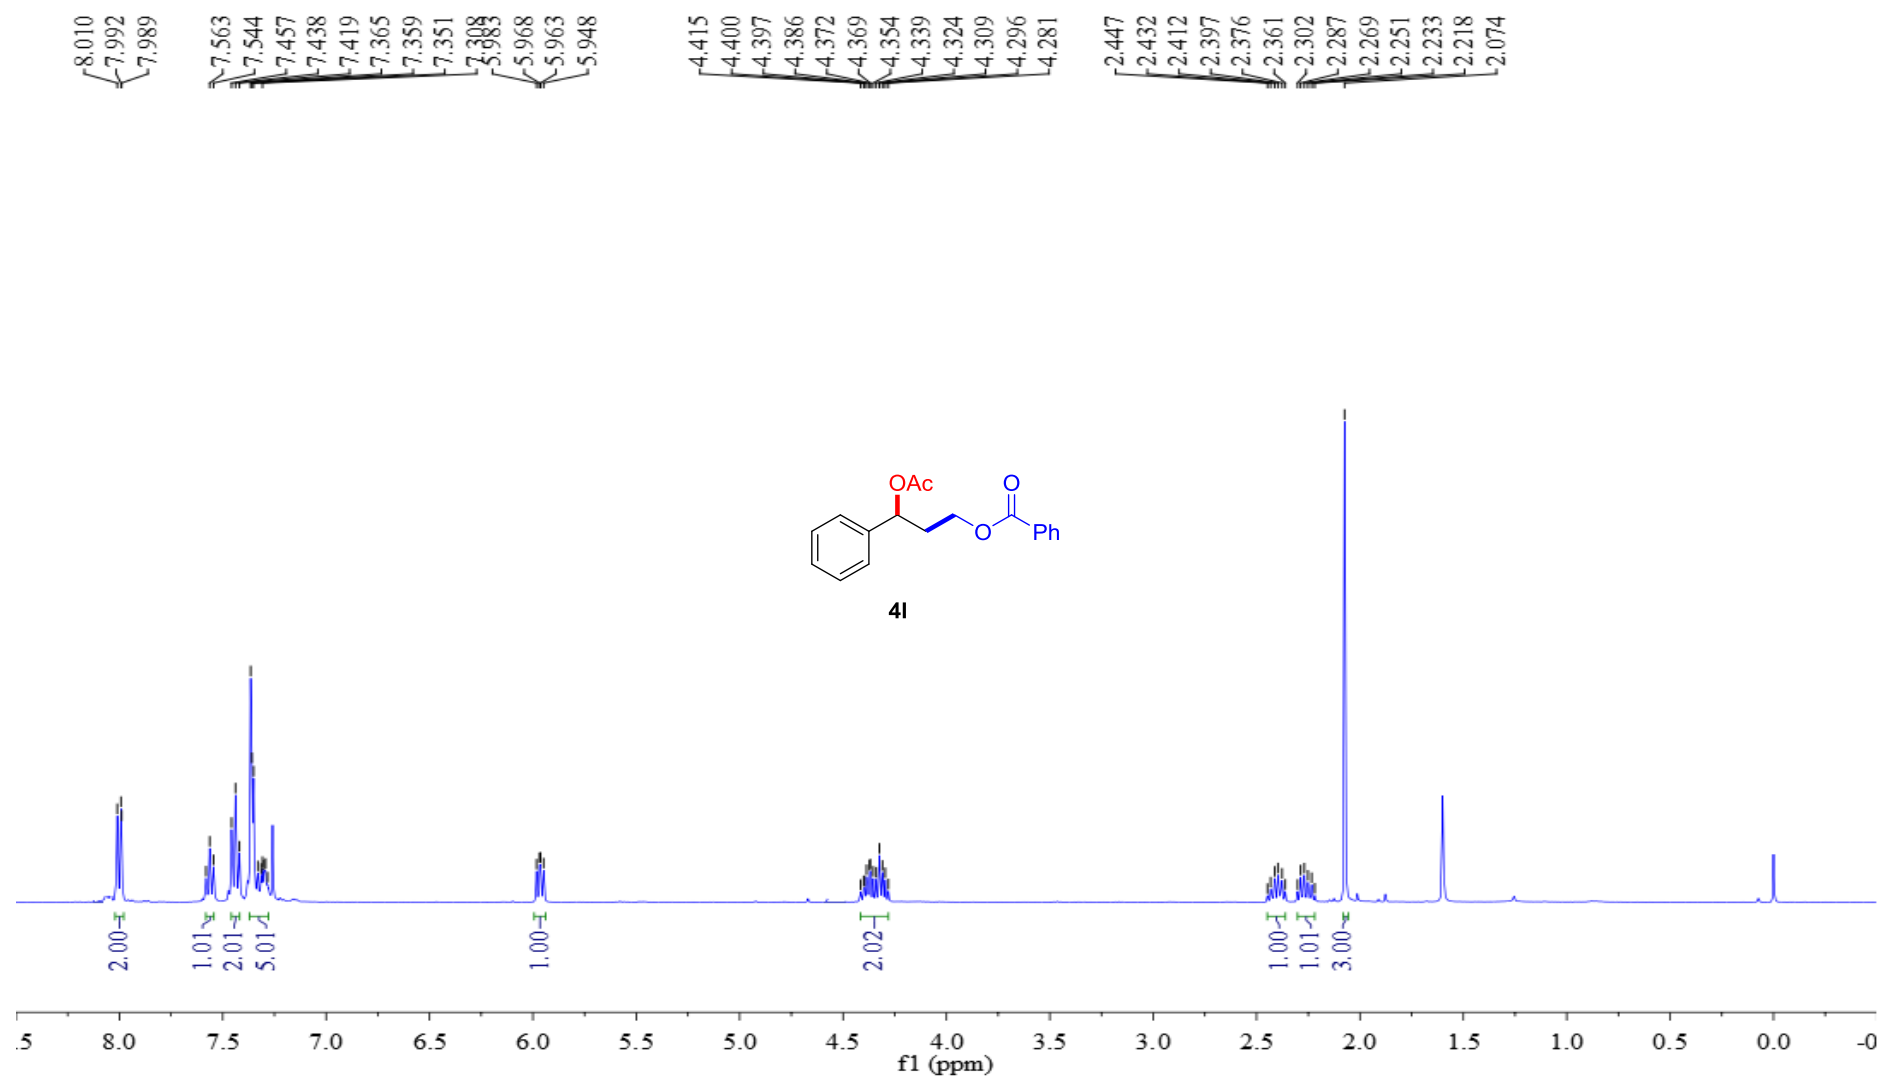

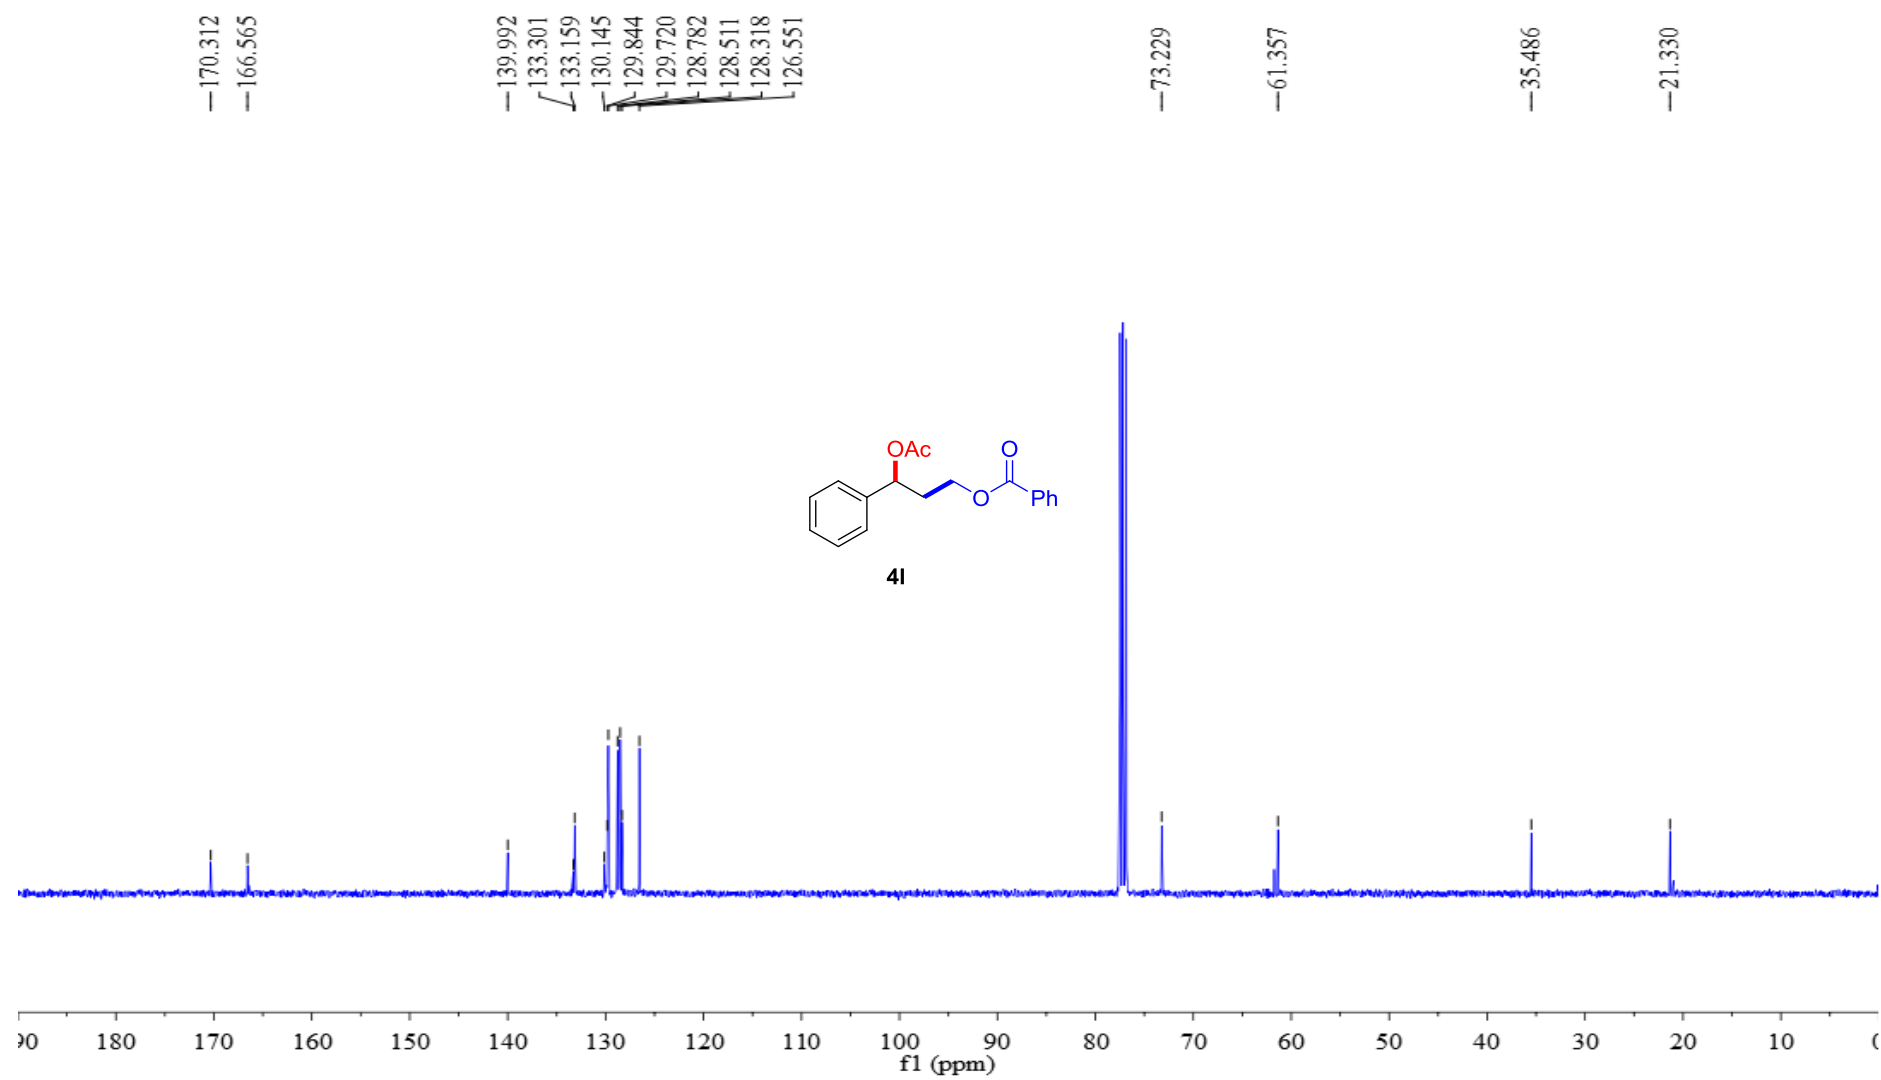

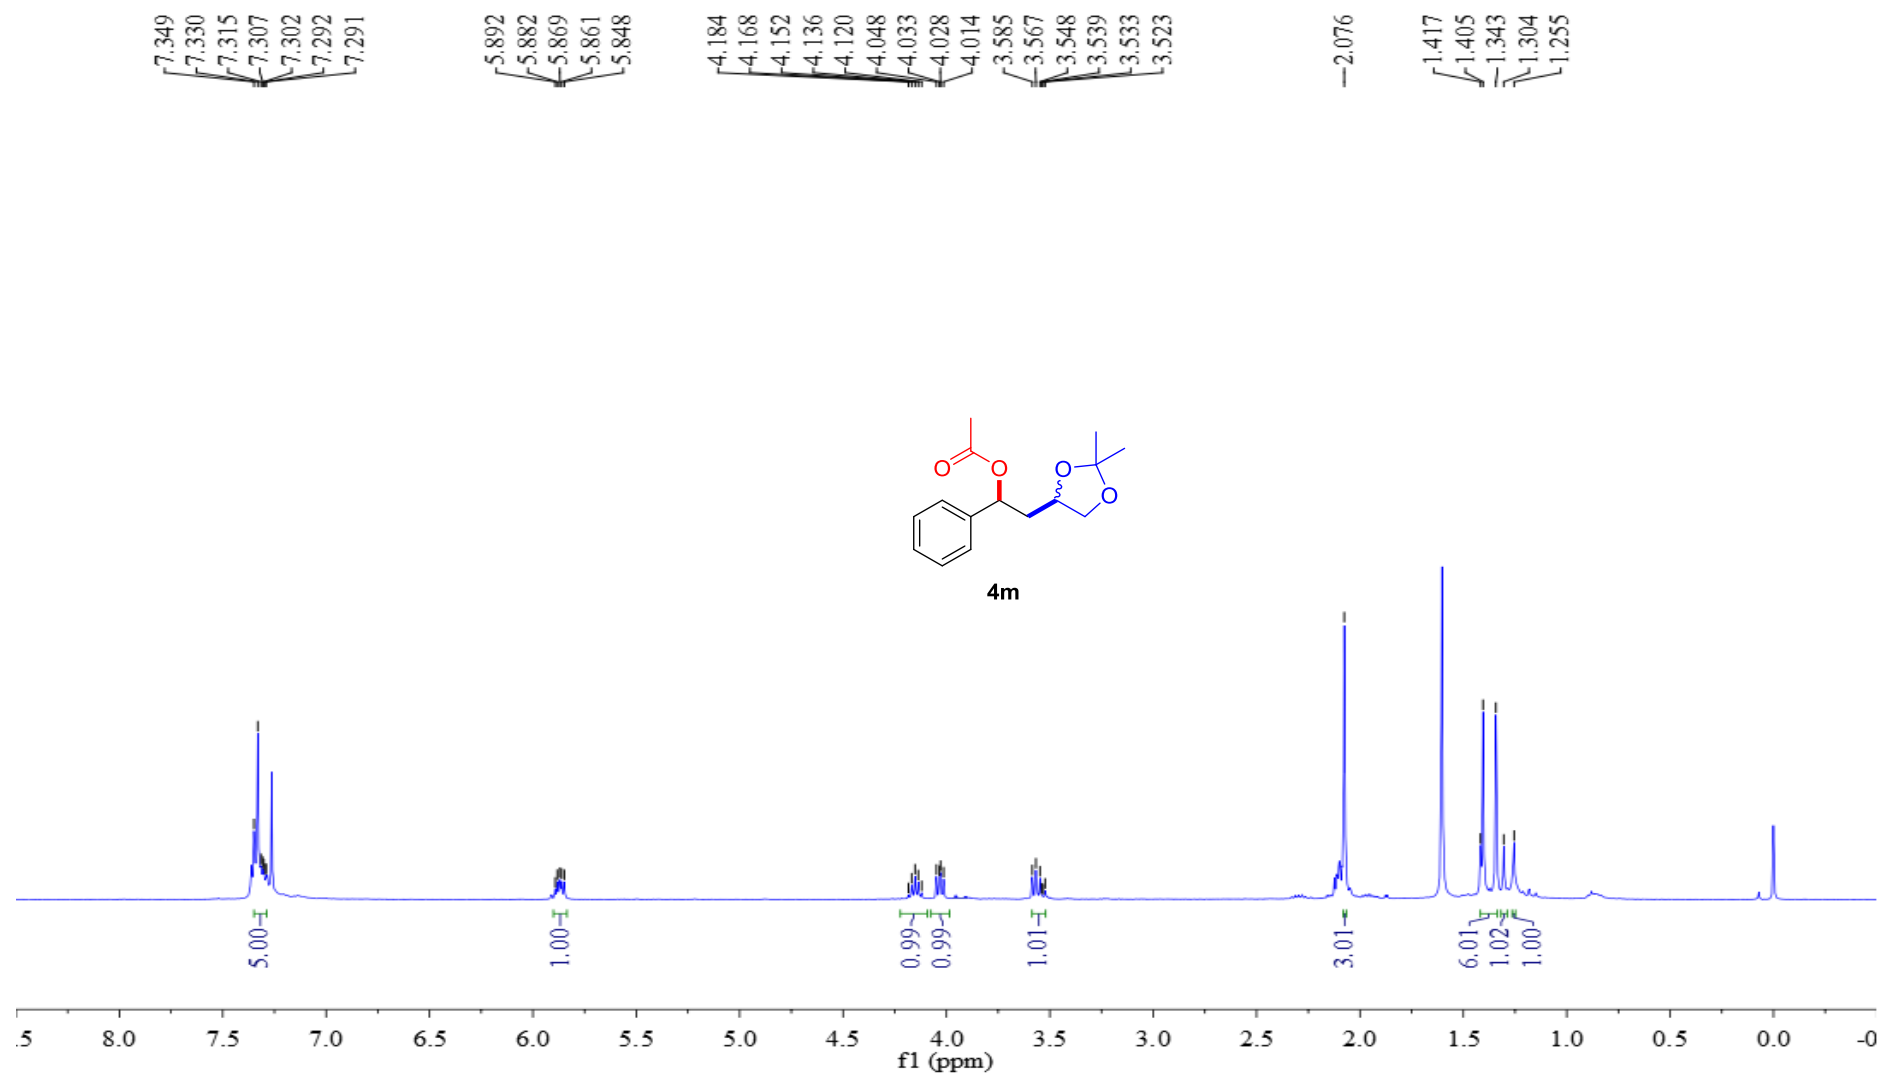

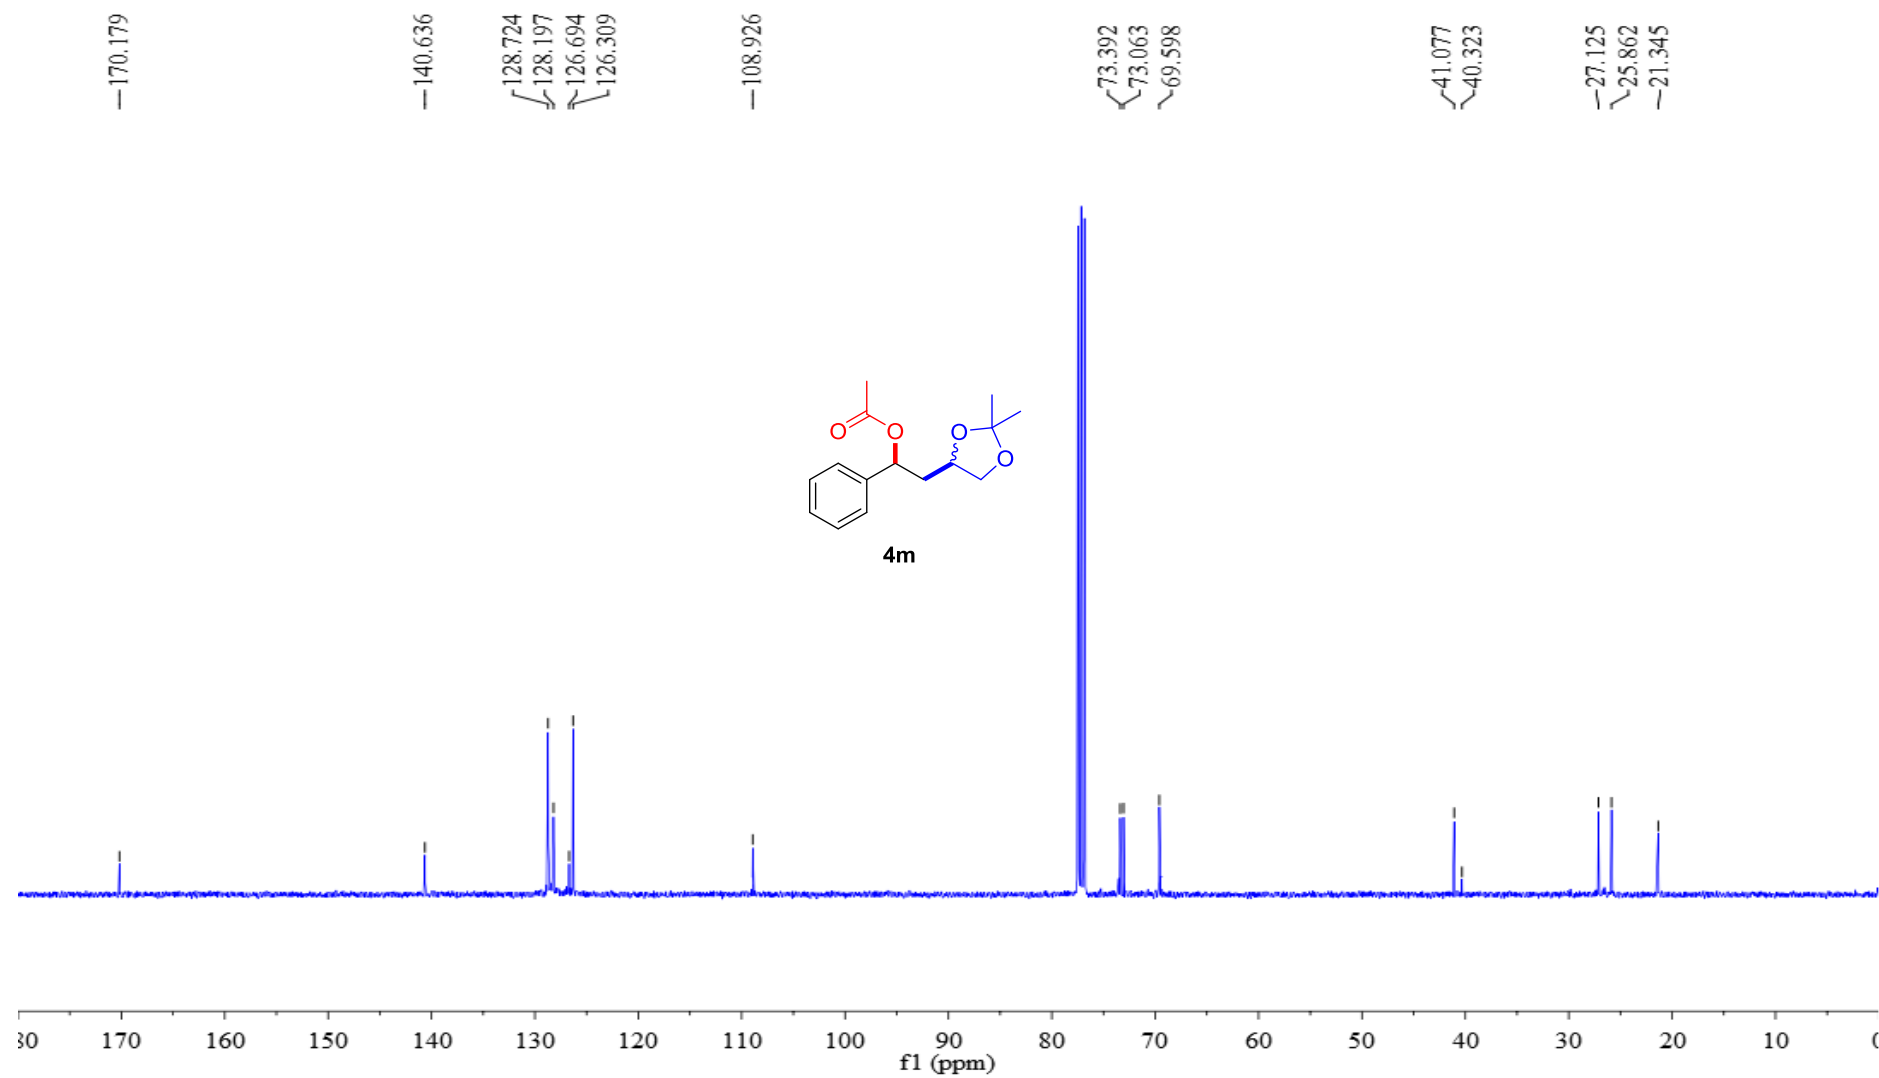



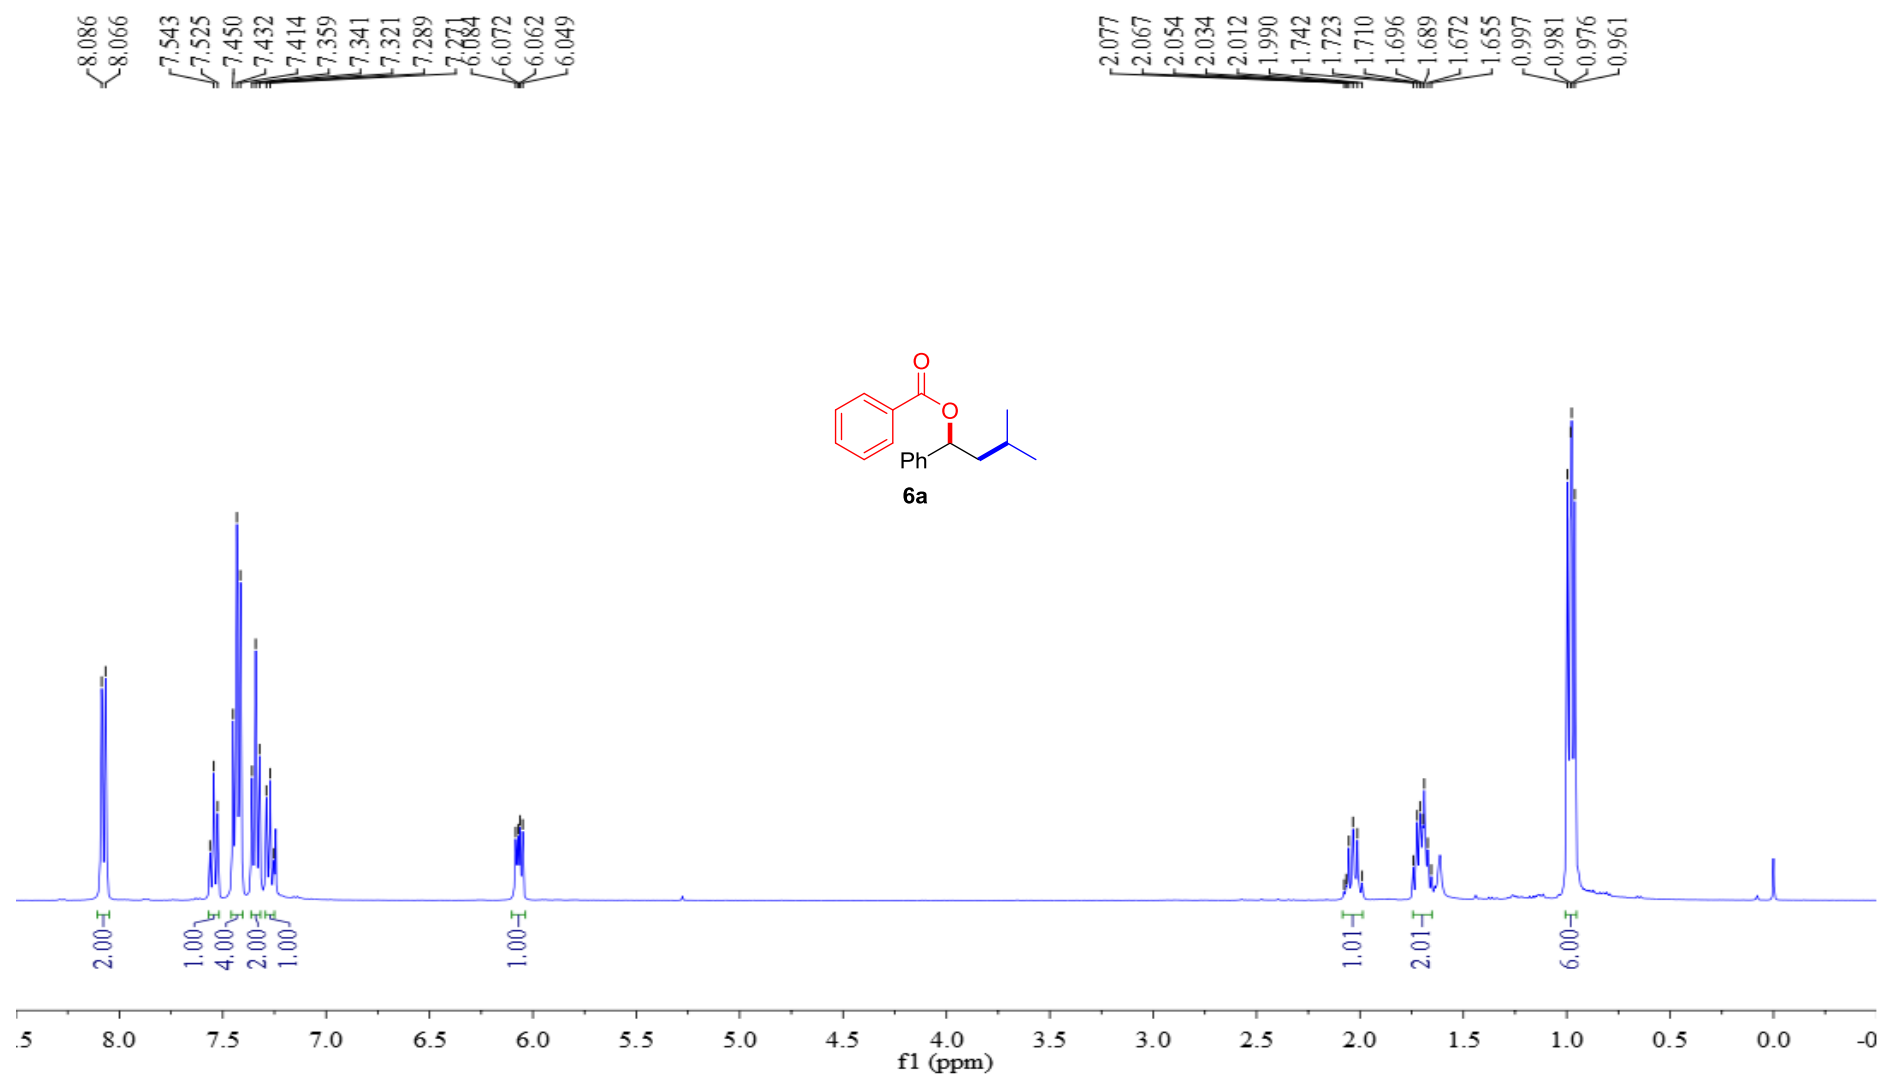

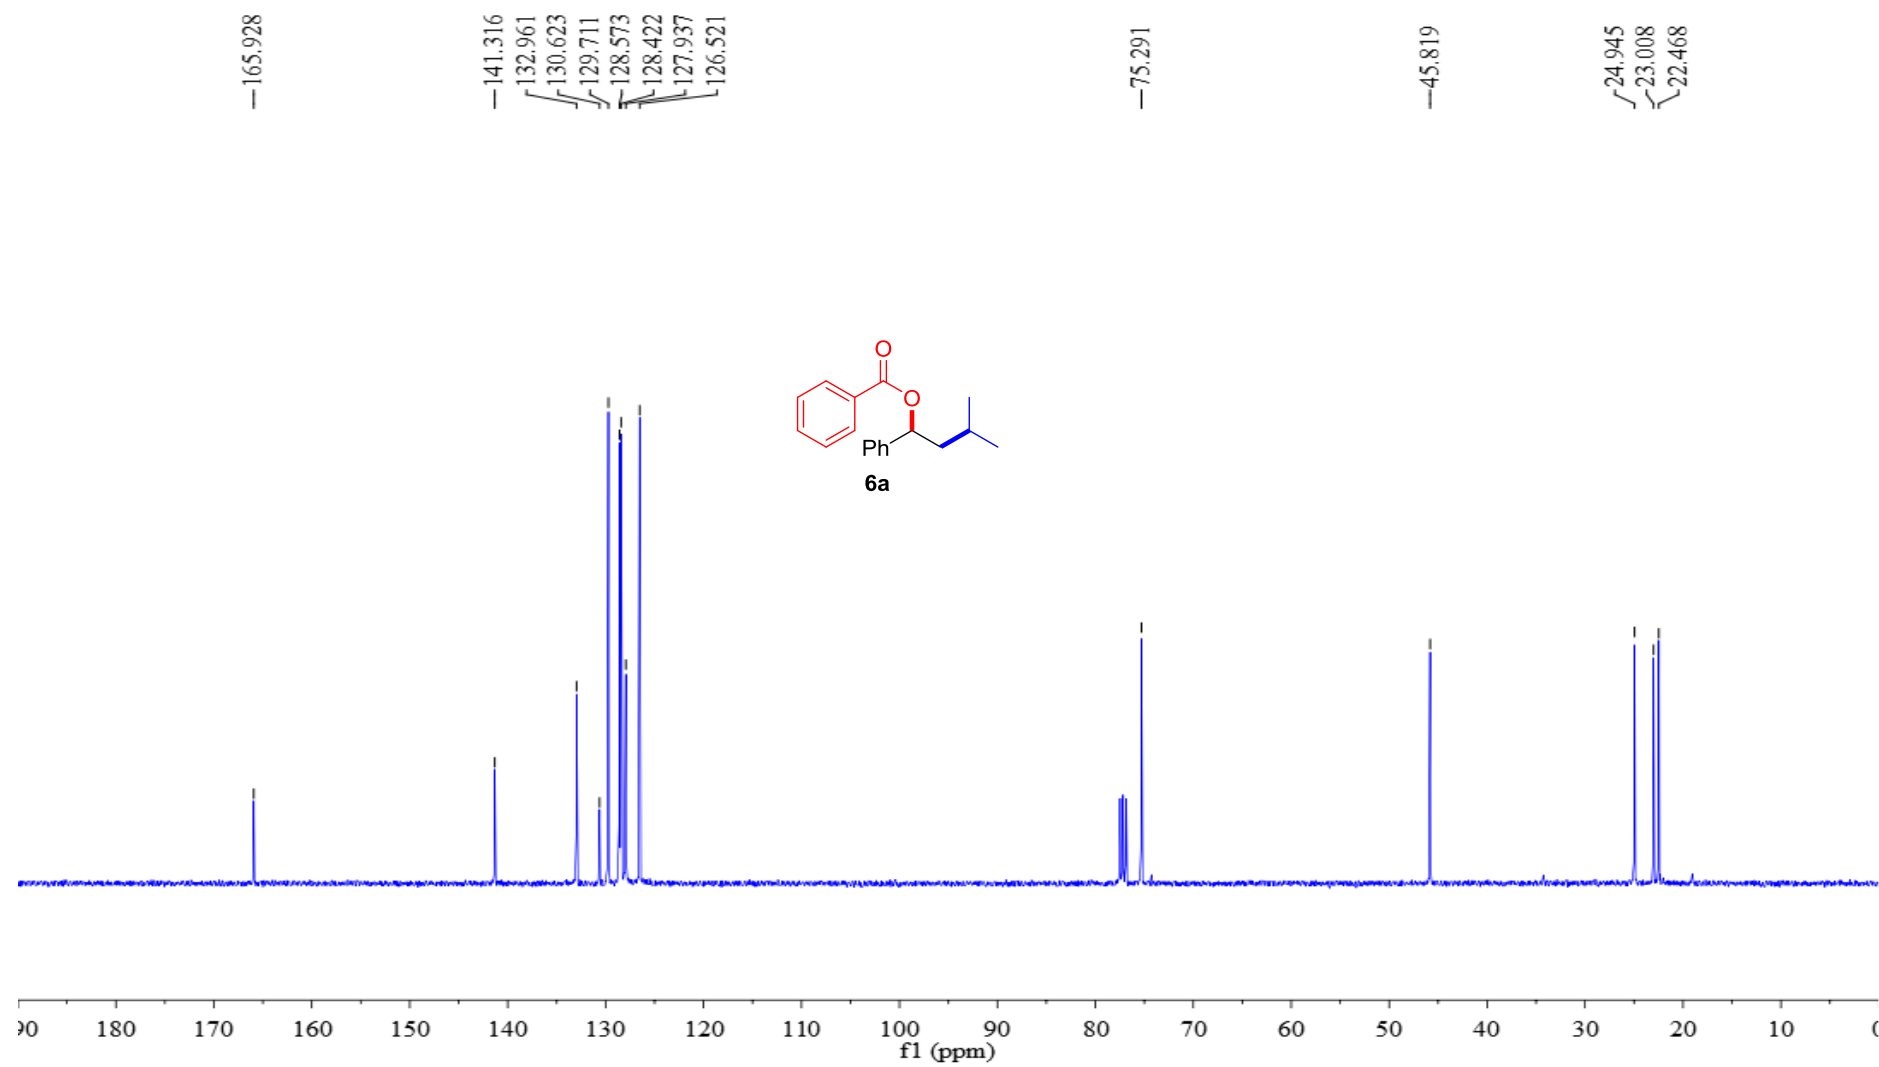

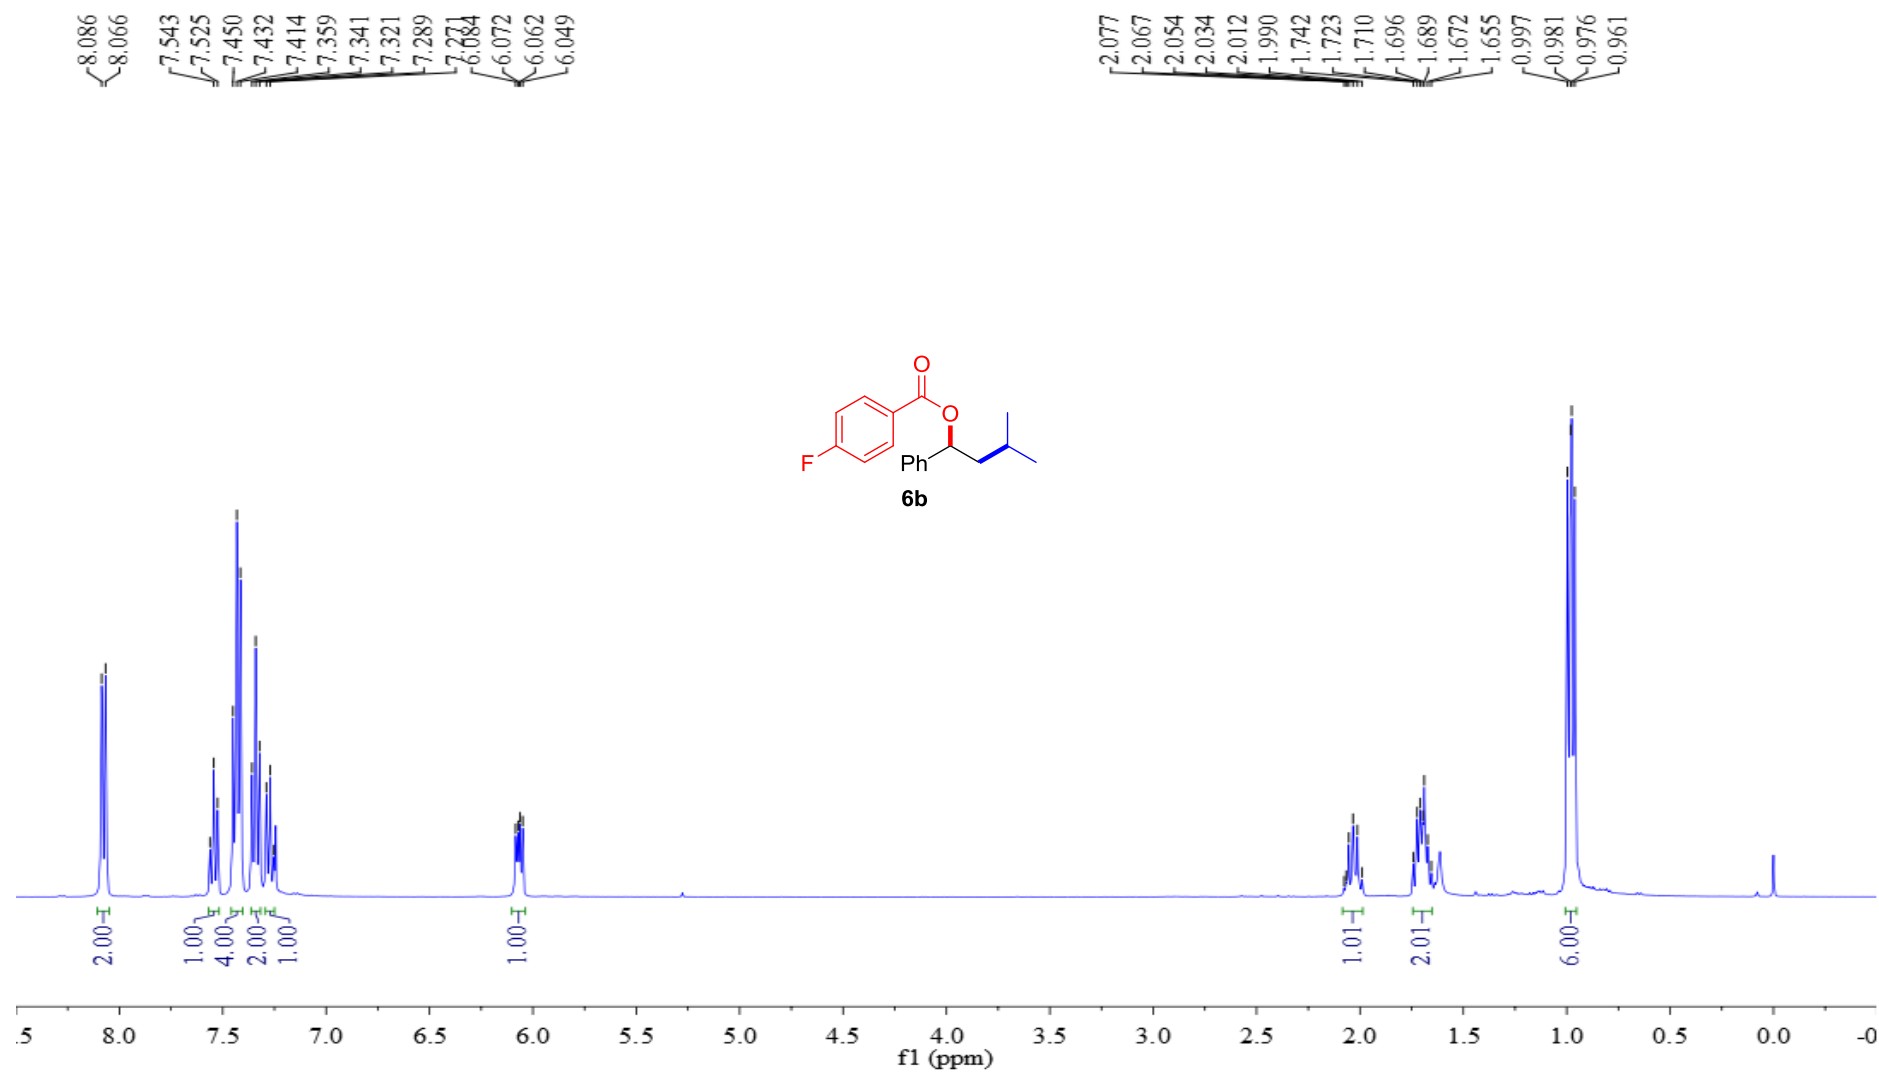

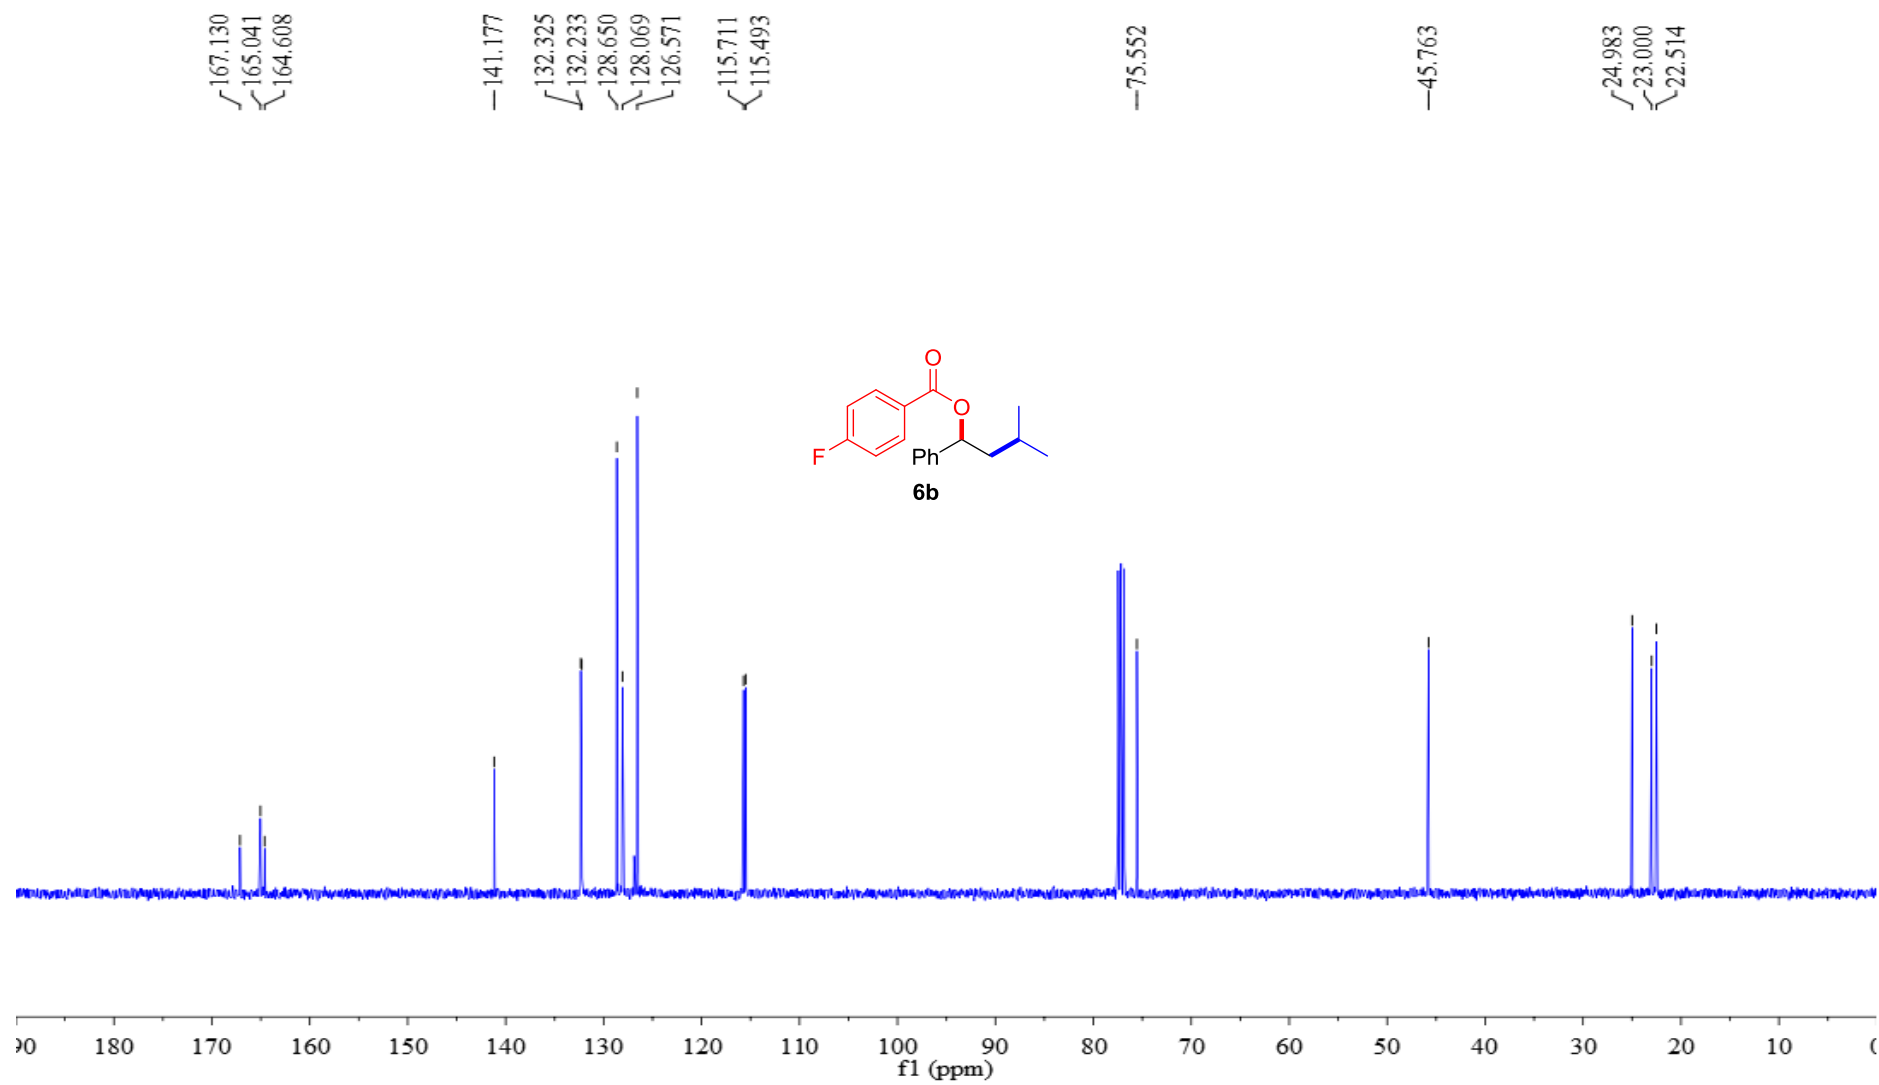

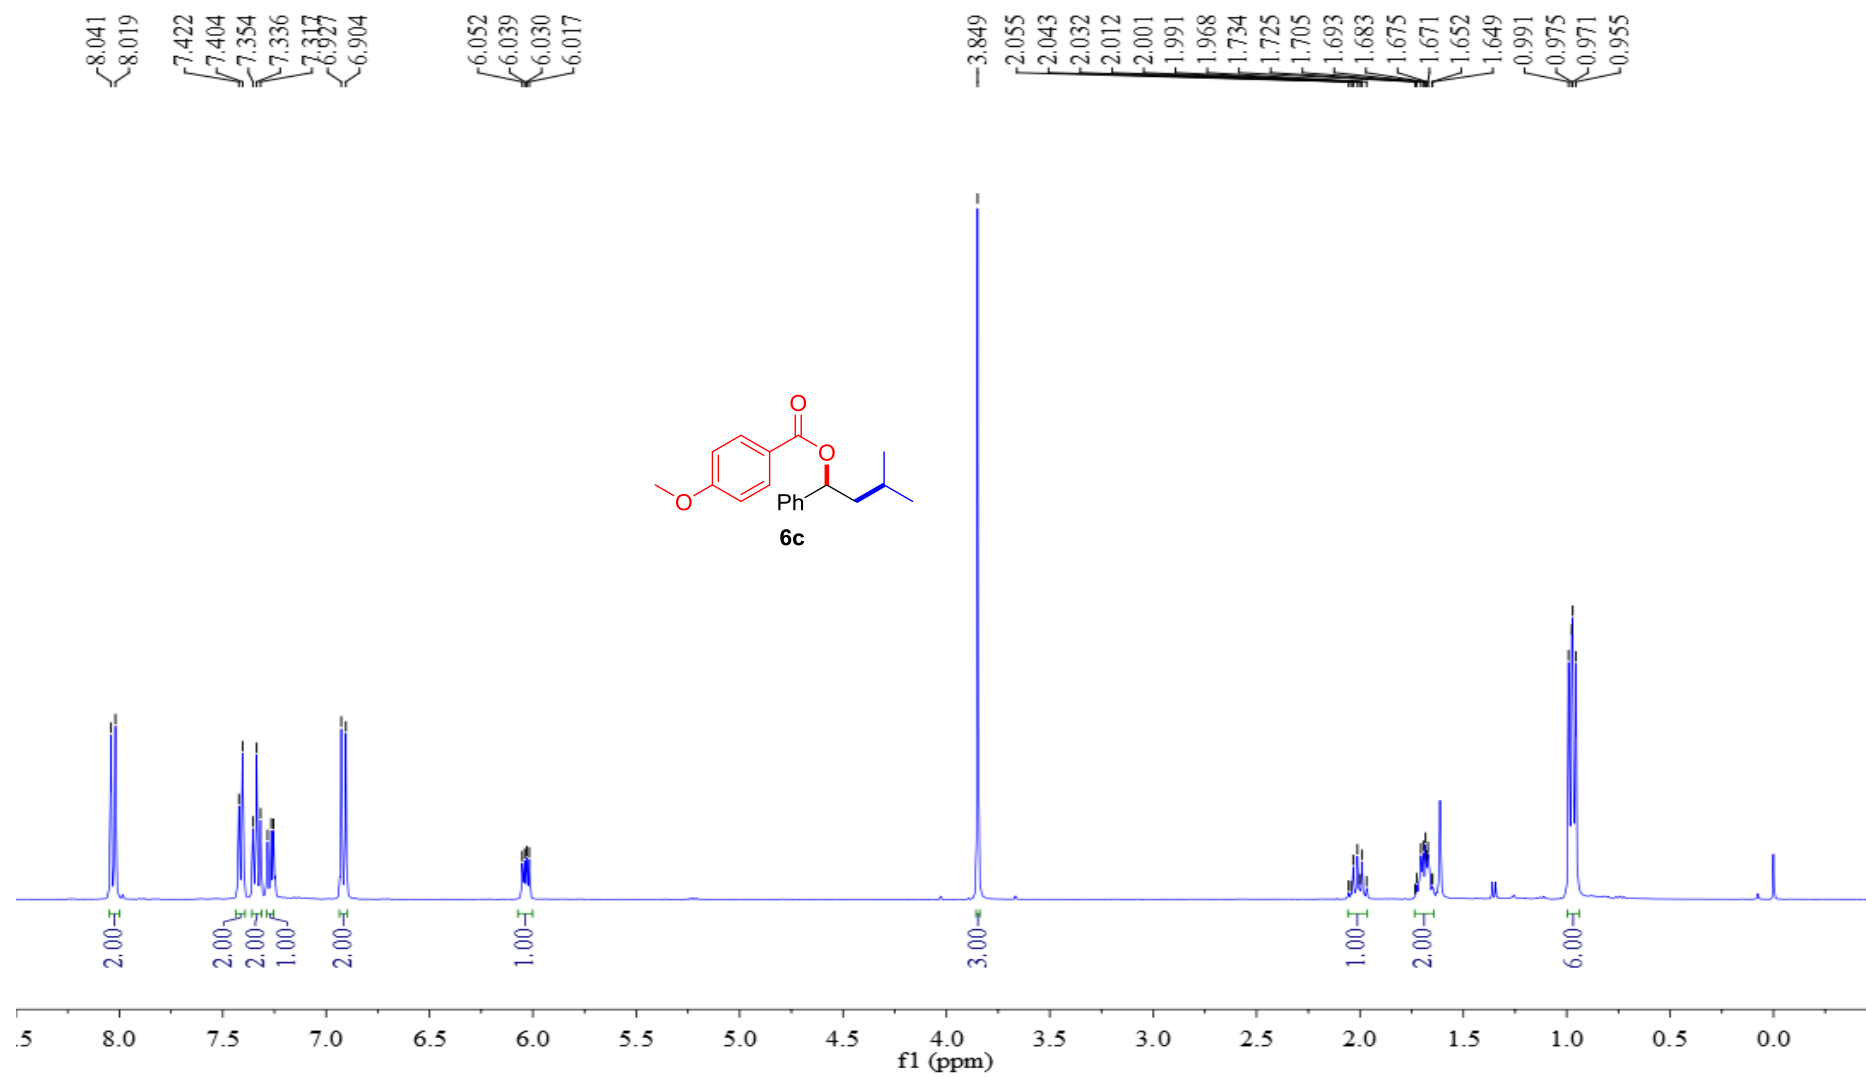

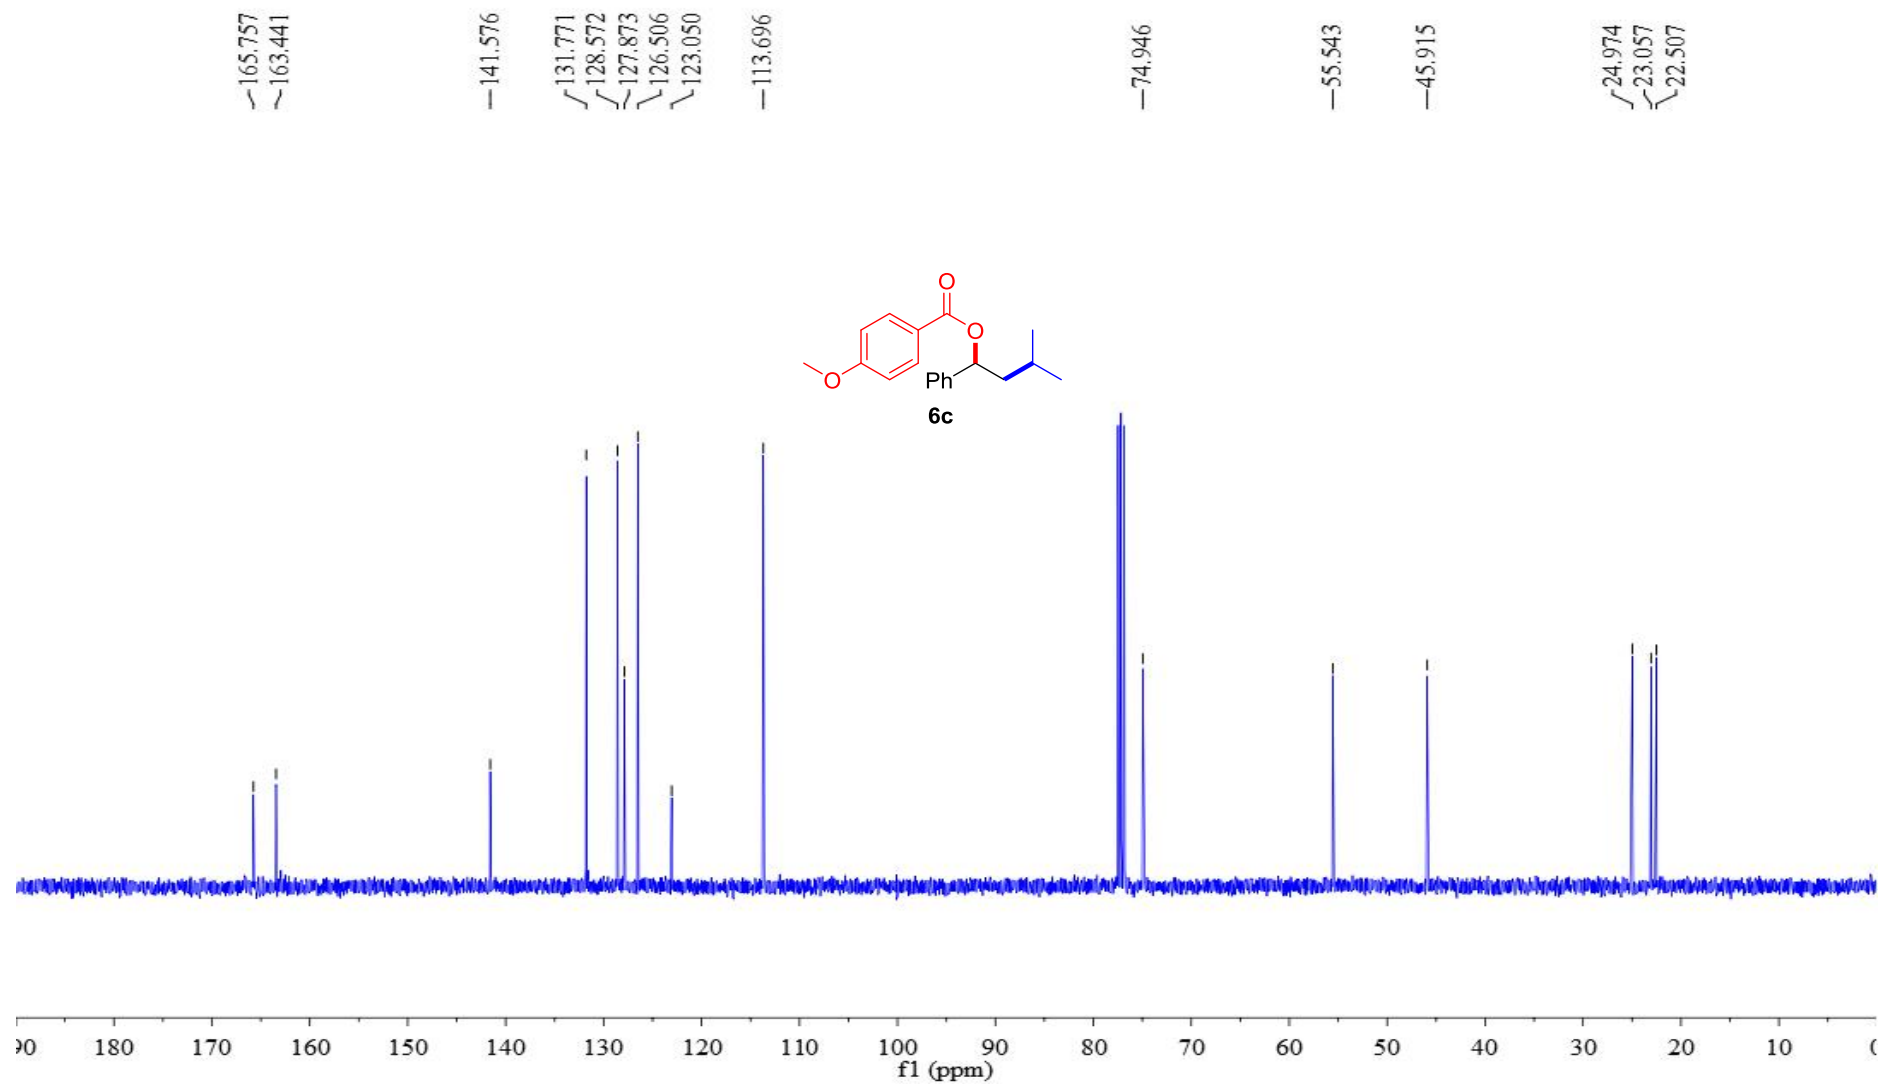

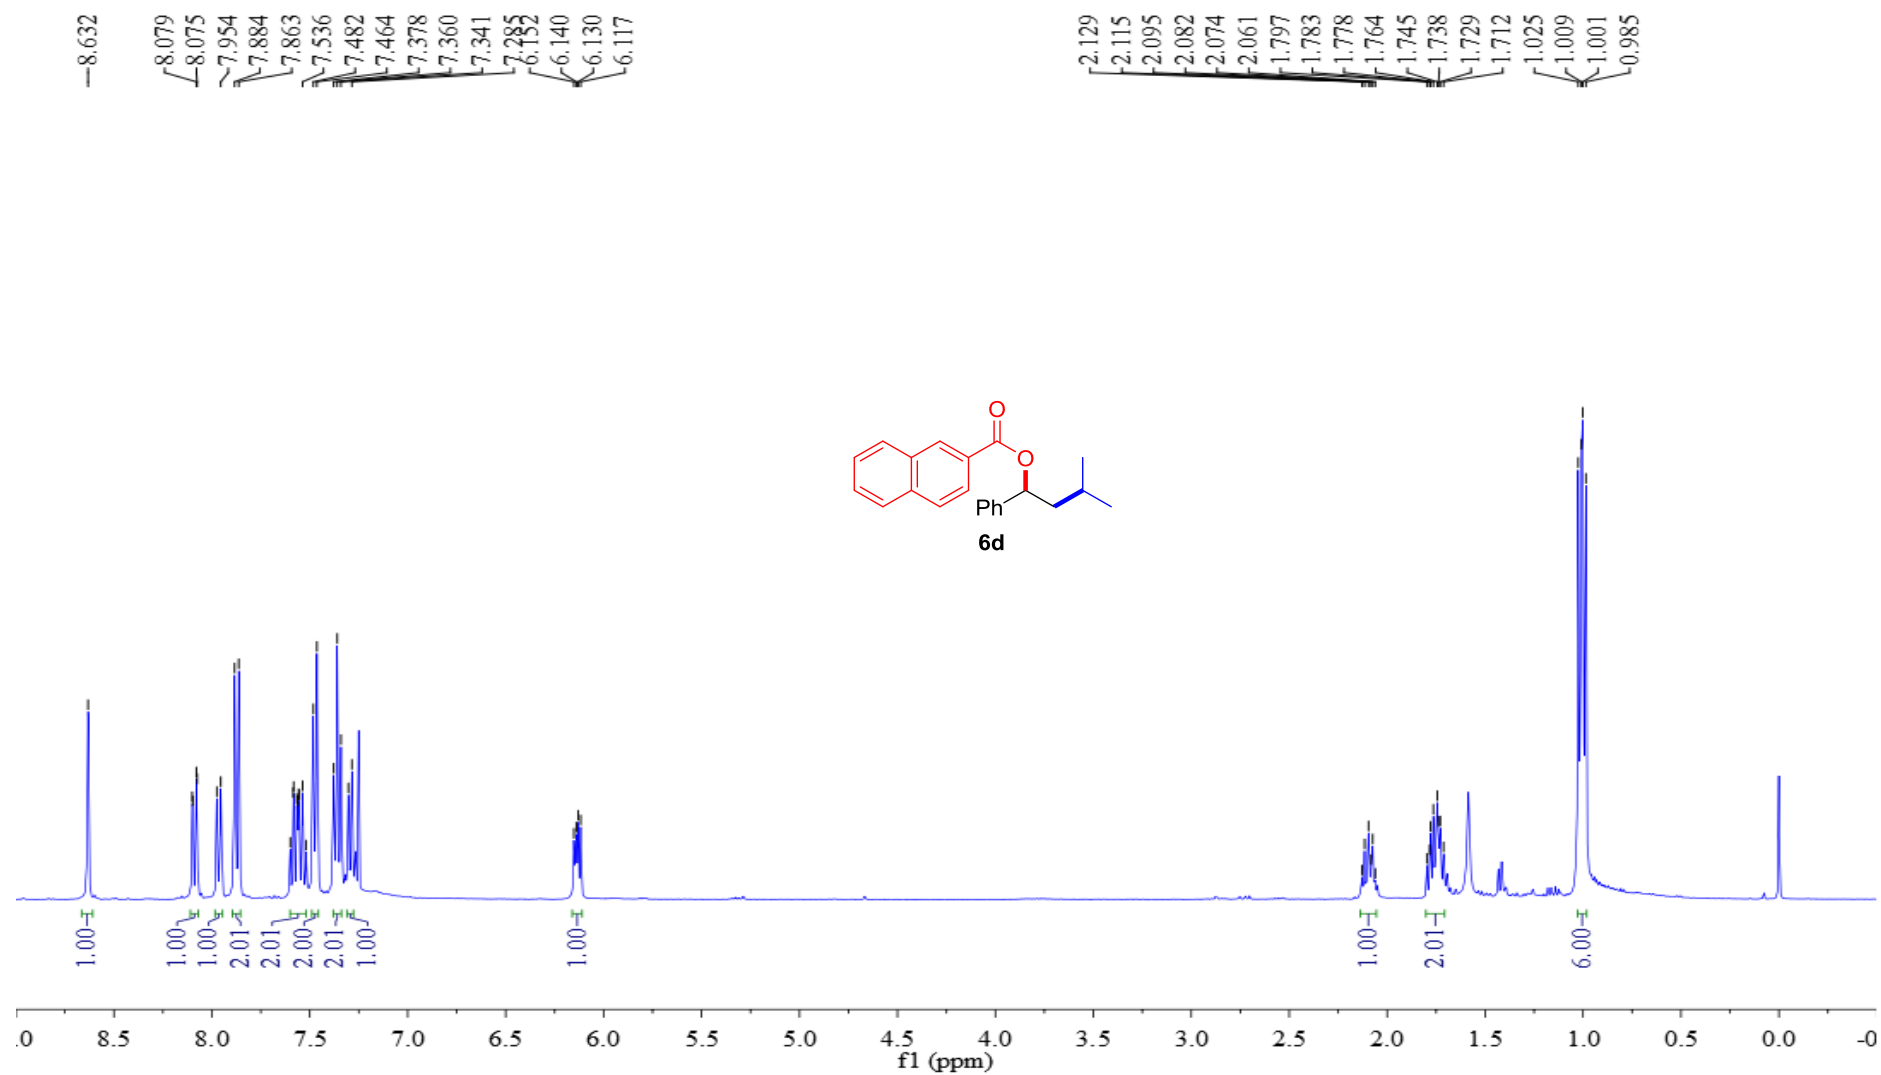

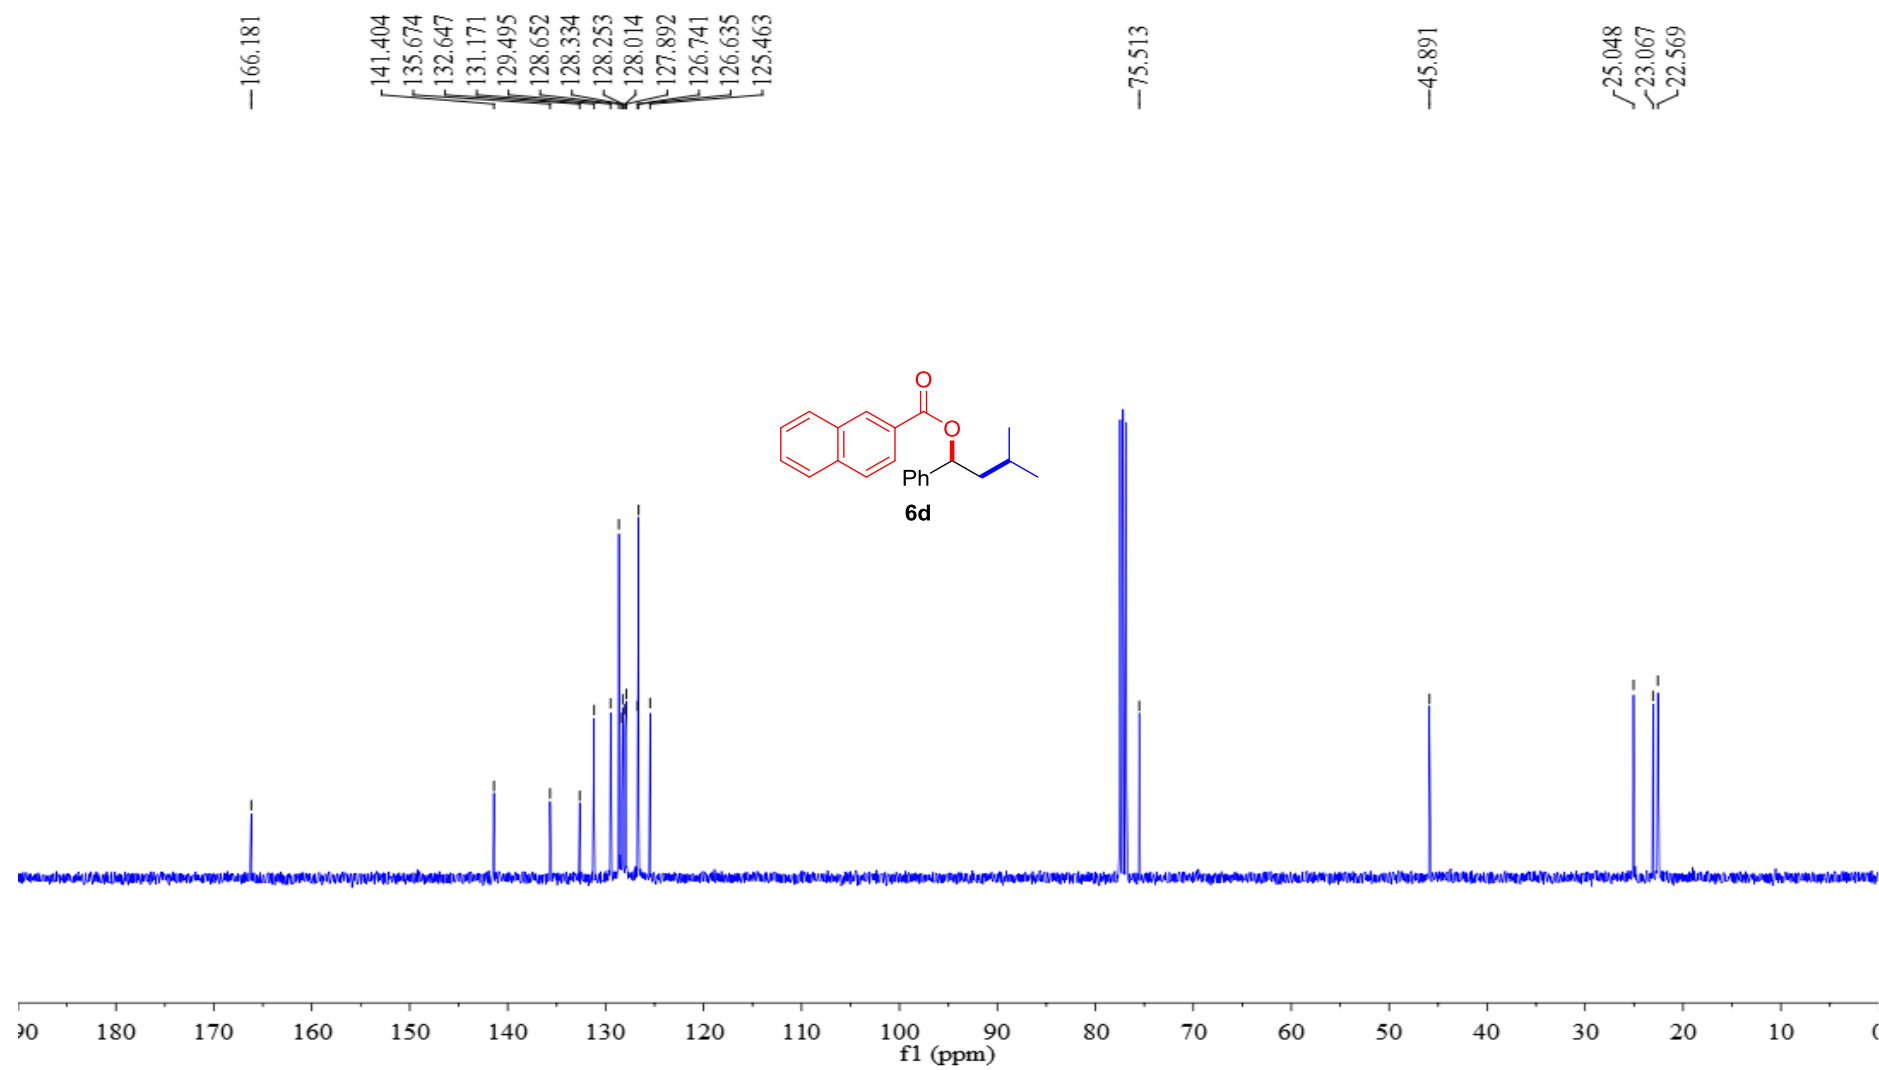



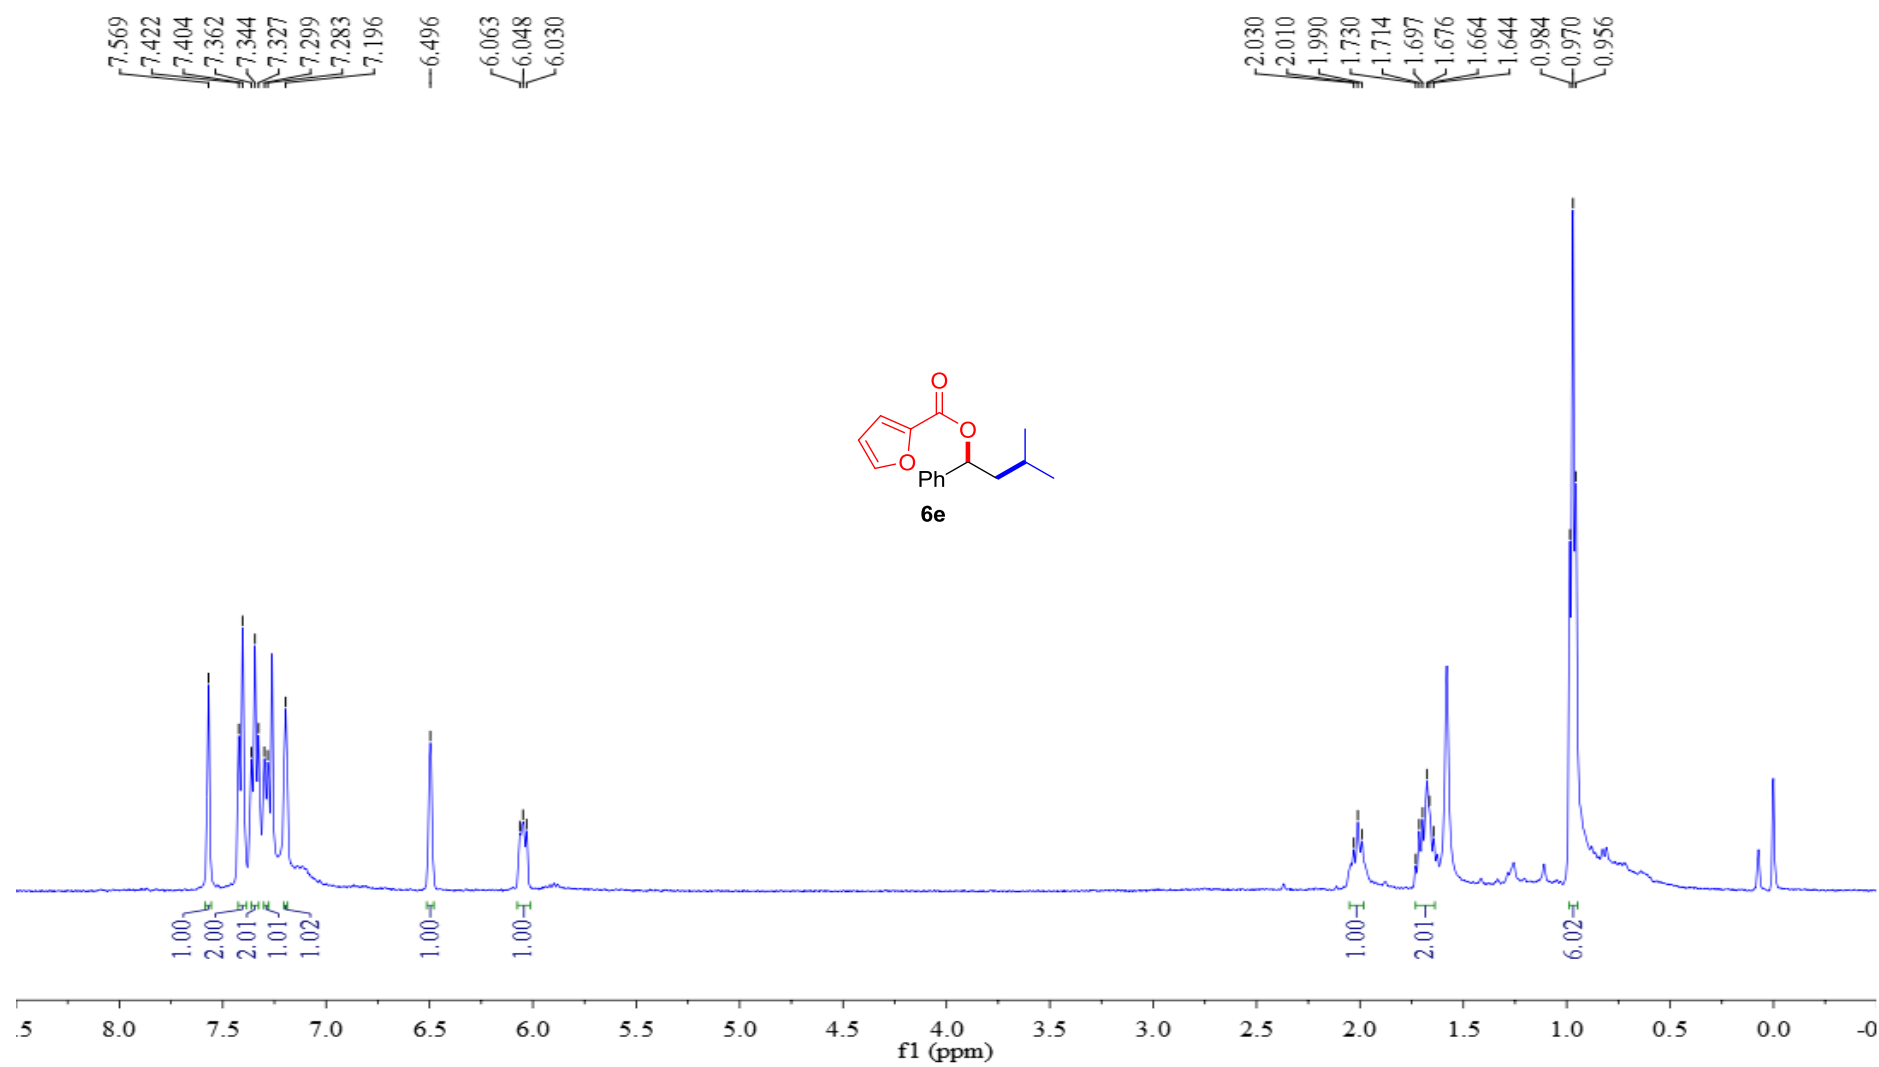

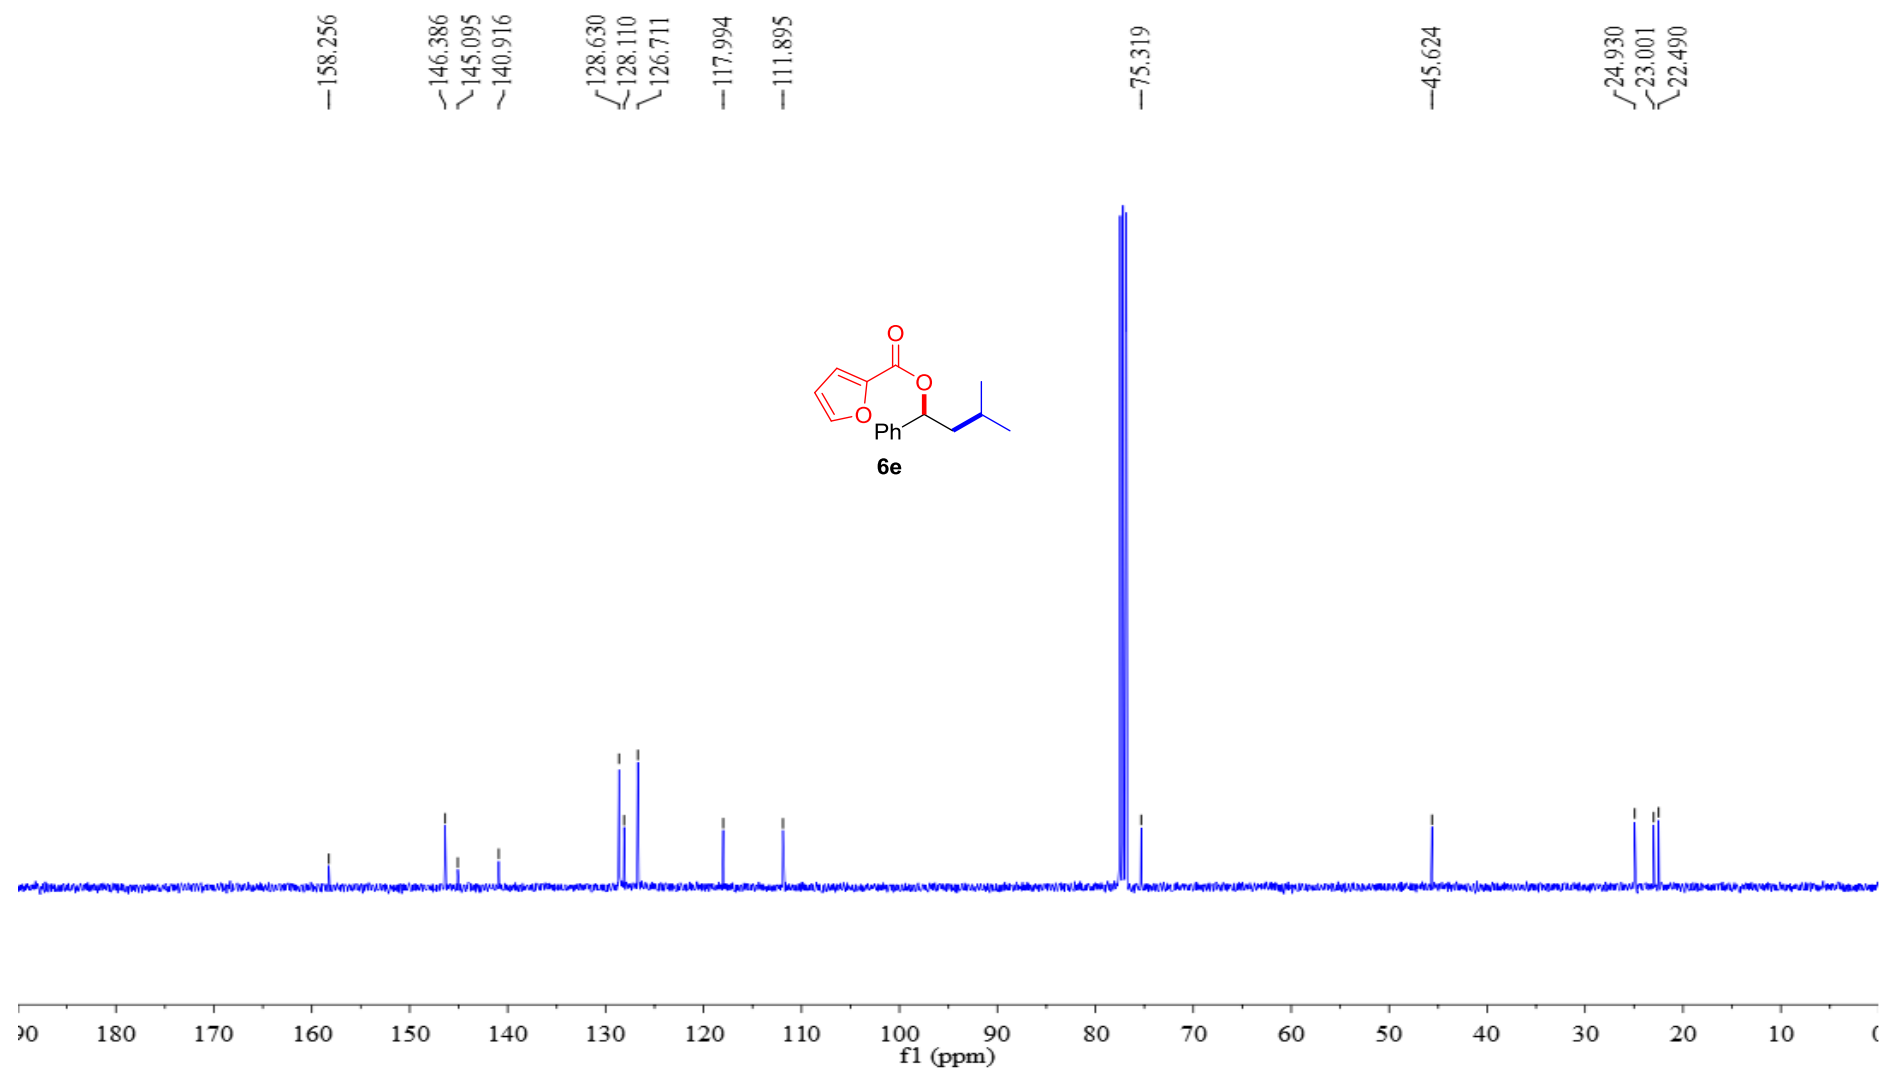

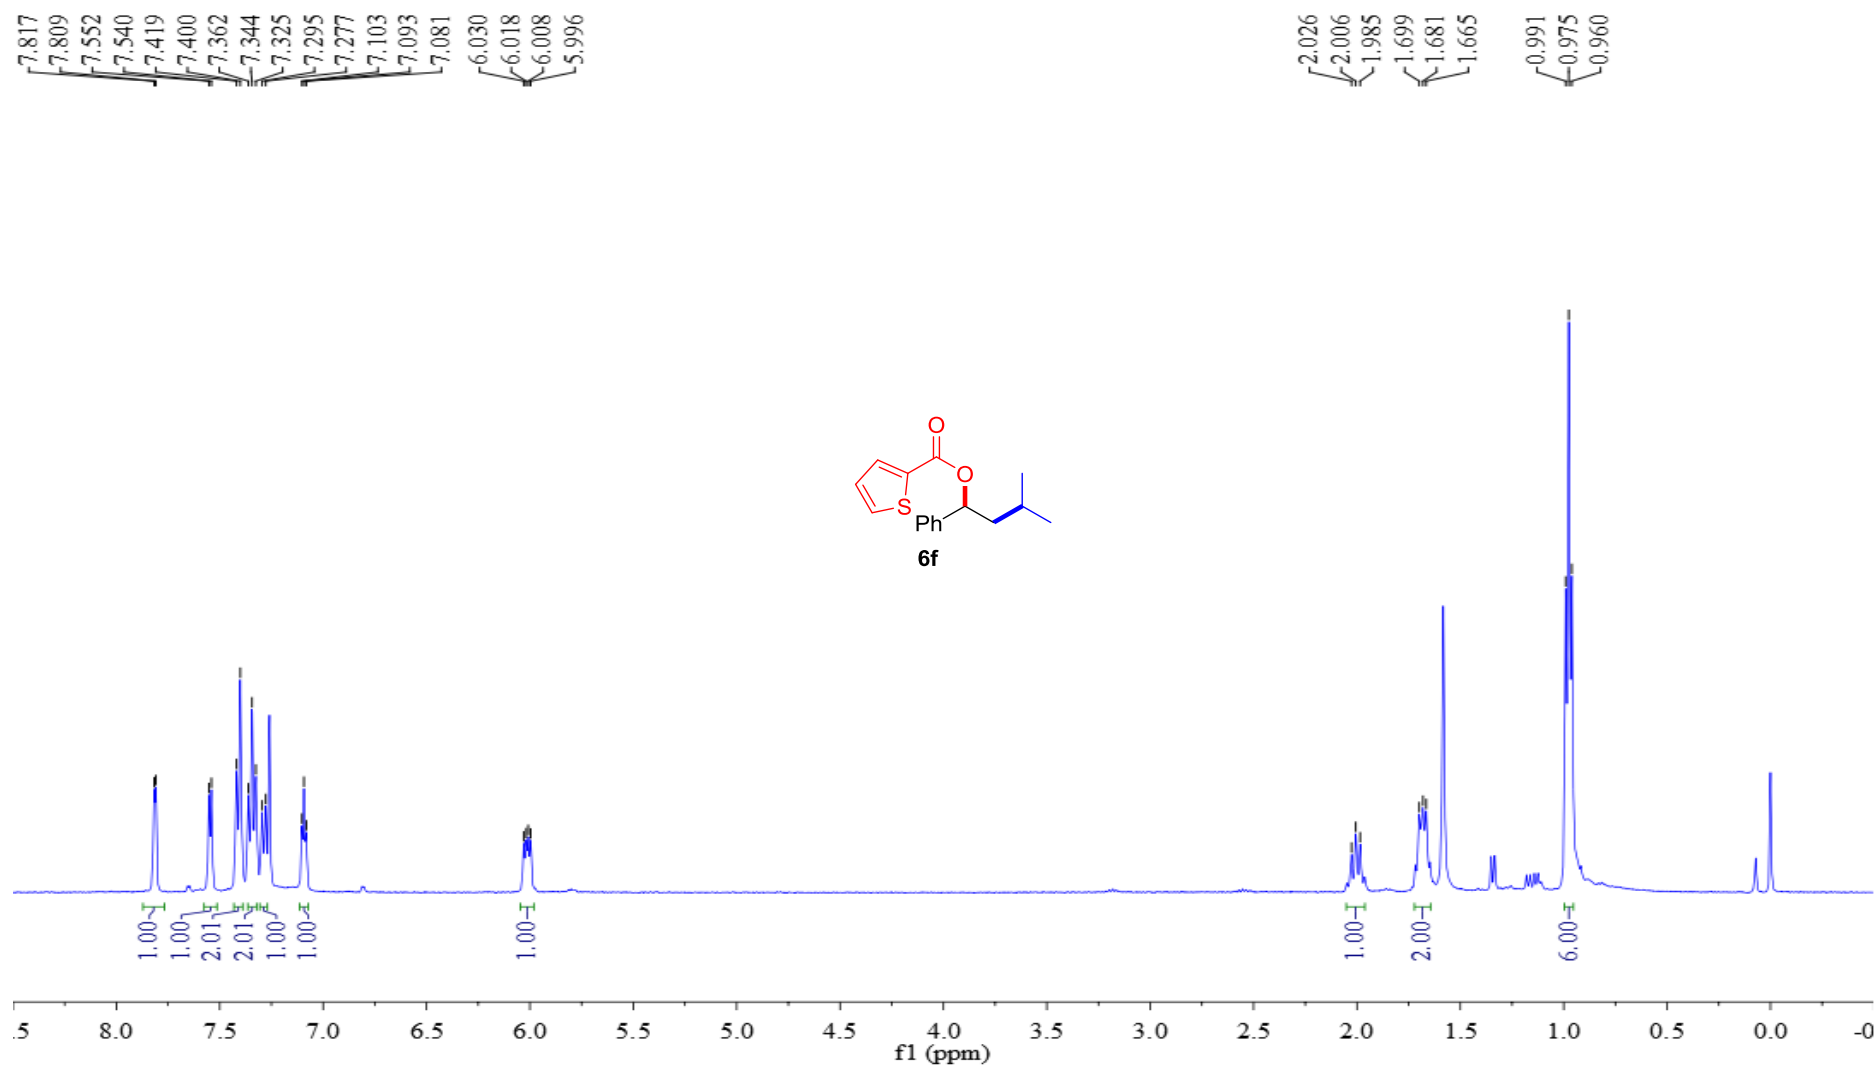

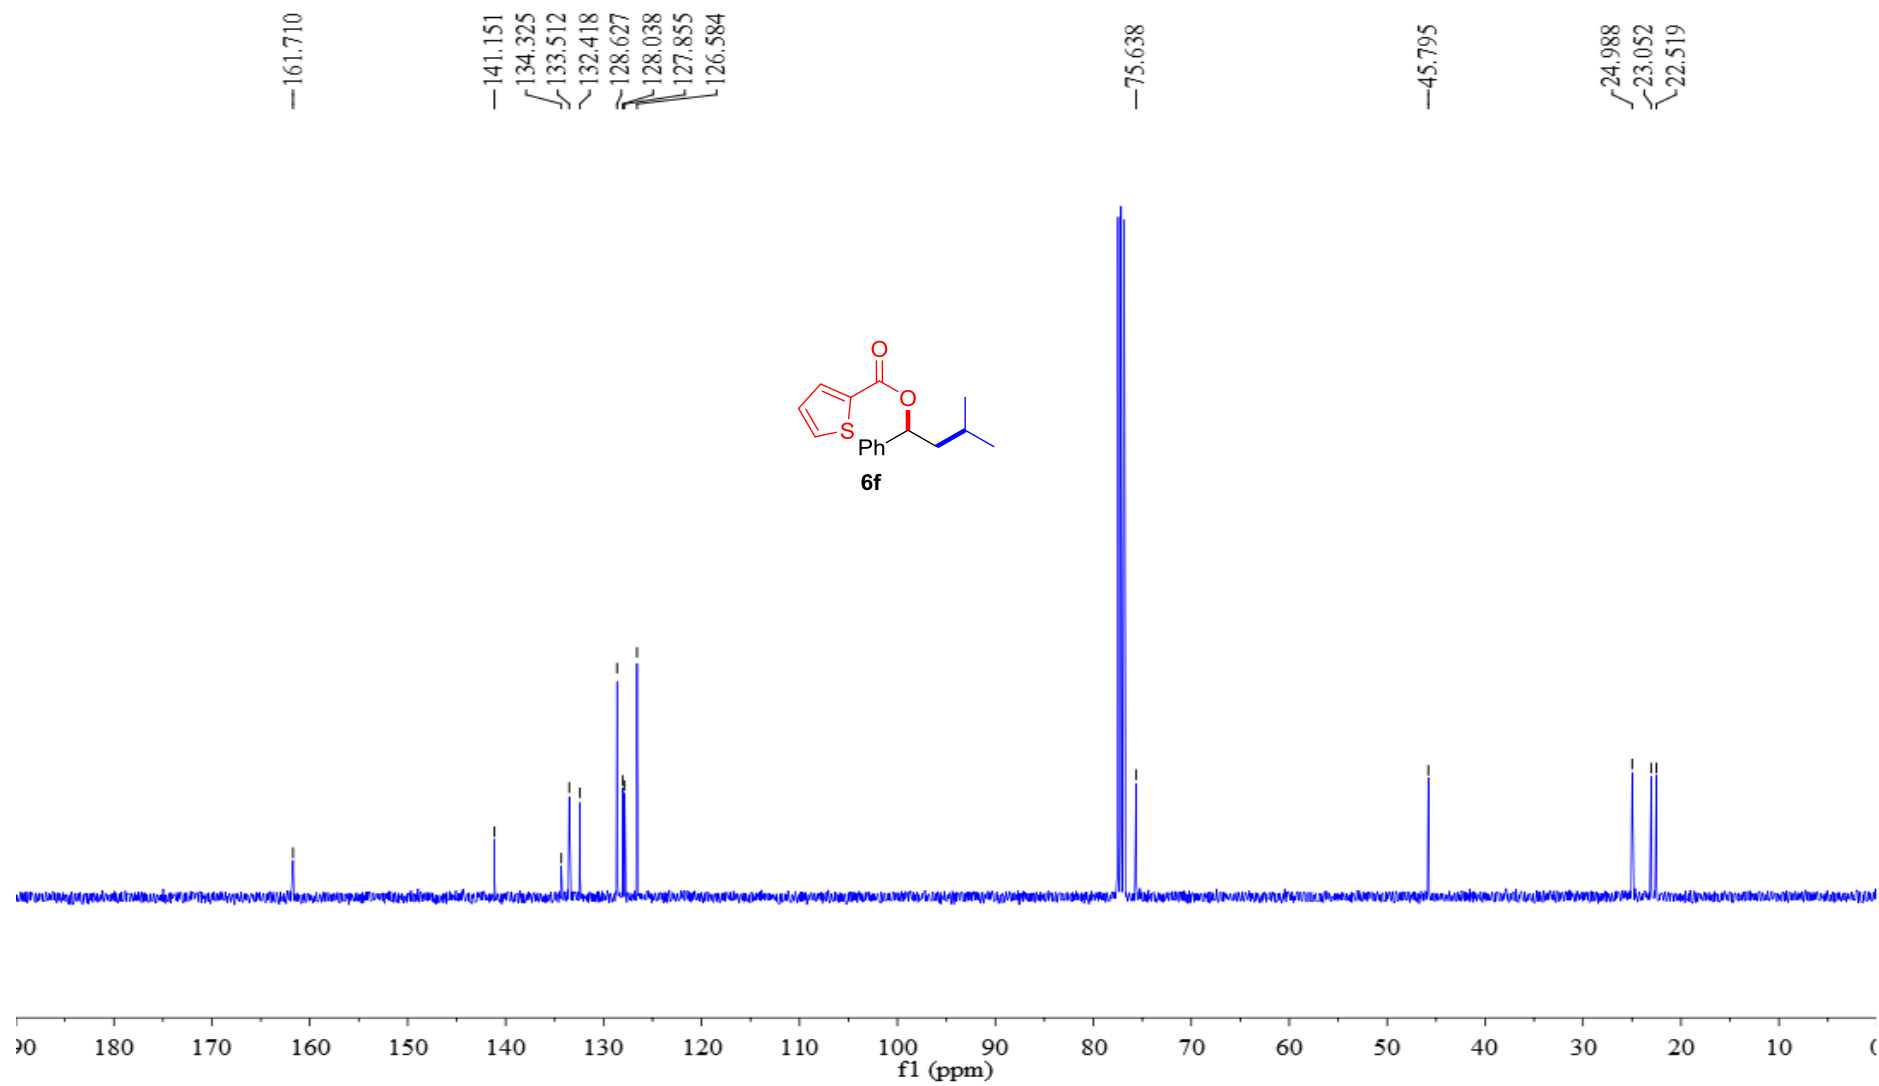

Supplement: c9qo00748b1.pdf [file c9qo00748b1.pdf]
